# Supplementary material for: GATK hard filtering: tunable parameters to improve variant calling for next generation sequencing targeted gene panel data
Source: PubMed Central journal article supplement (PMC5374681; doi:10.1186/s12859-017-1537-8), 2017-03-23

# ROC-plot pp.low.nsnp.hete BaseQRankSum

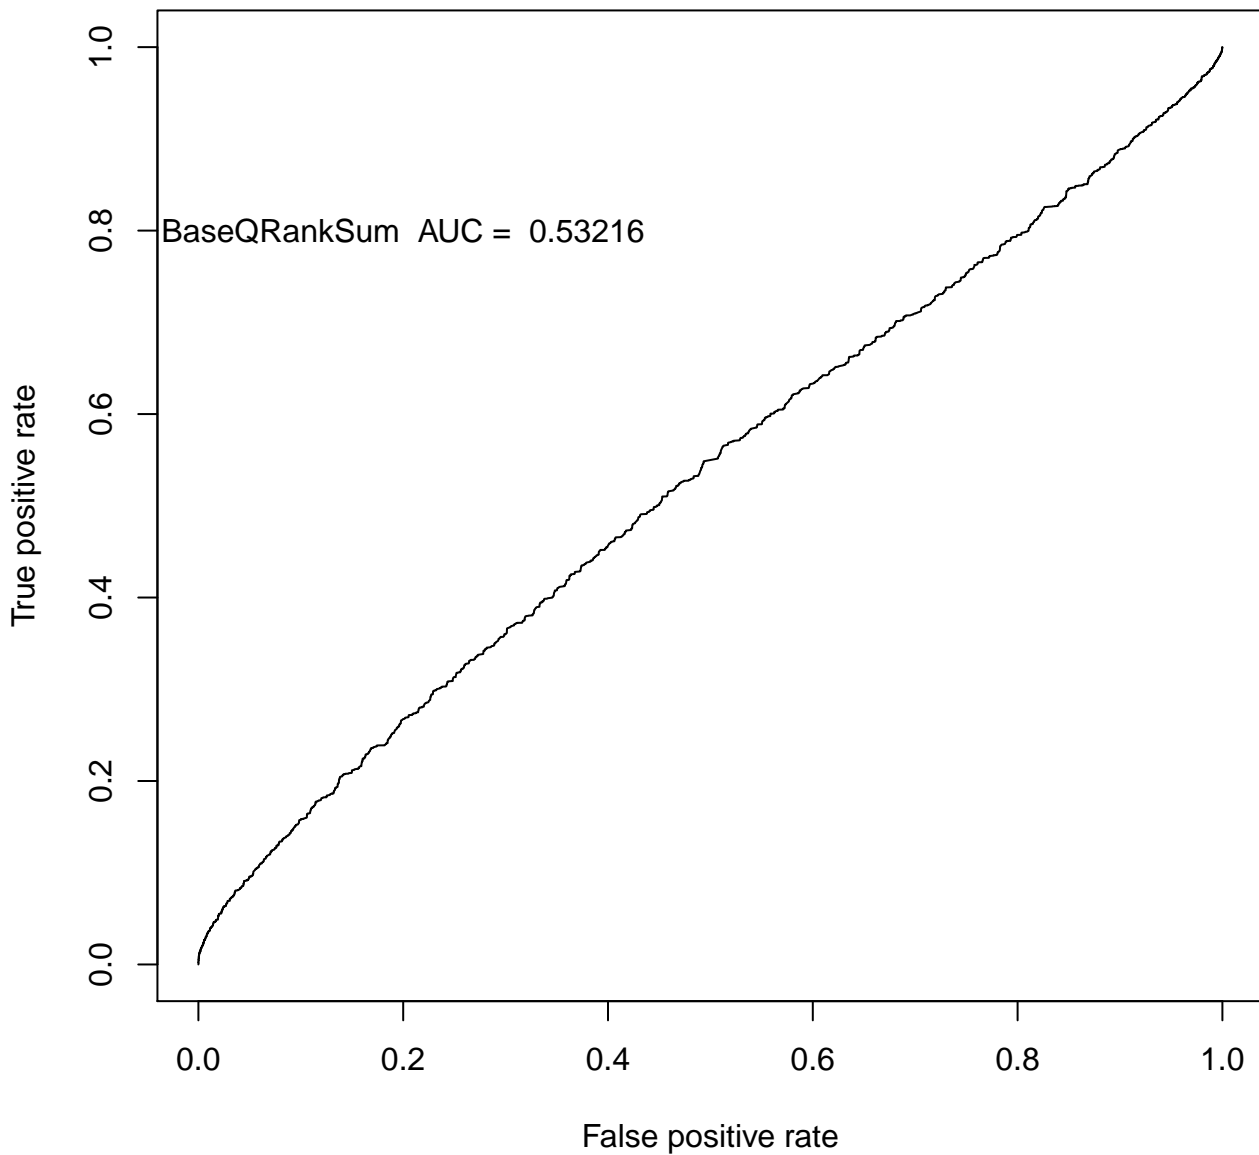

# ROC-plot pp.low.nsnp.hete ClippingRankSum

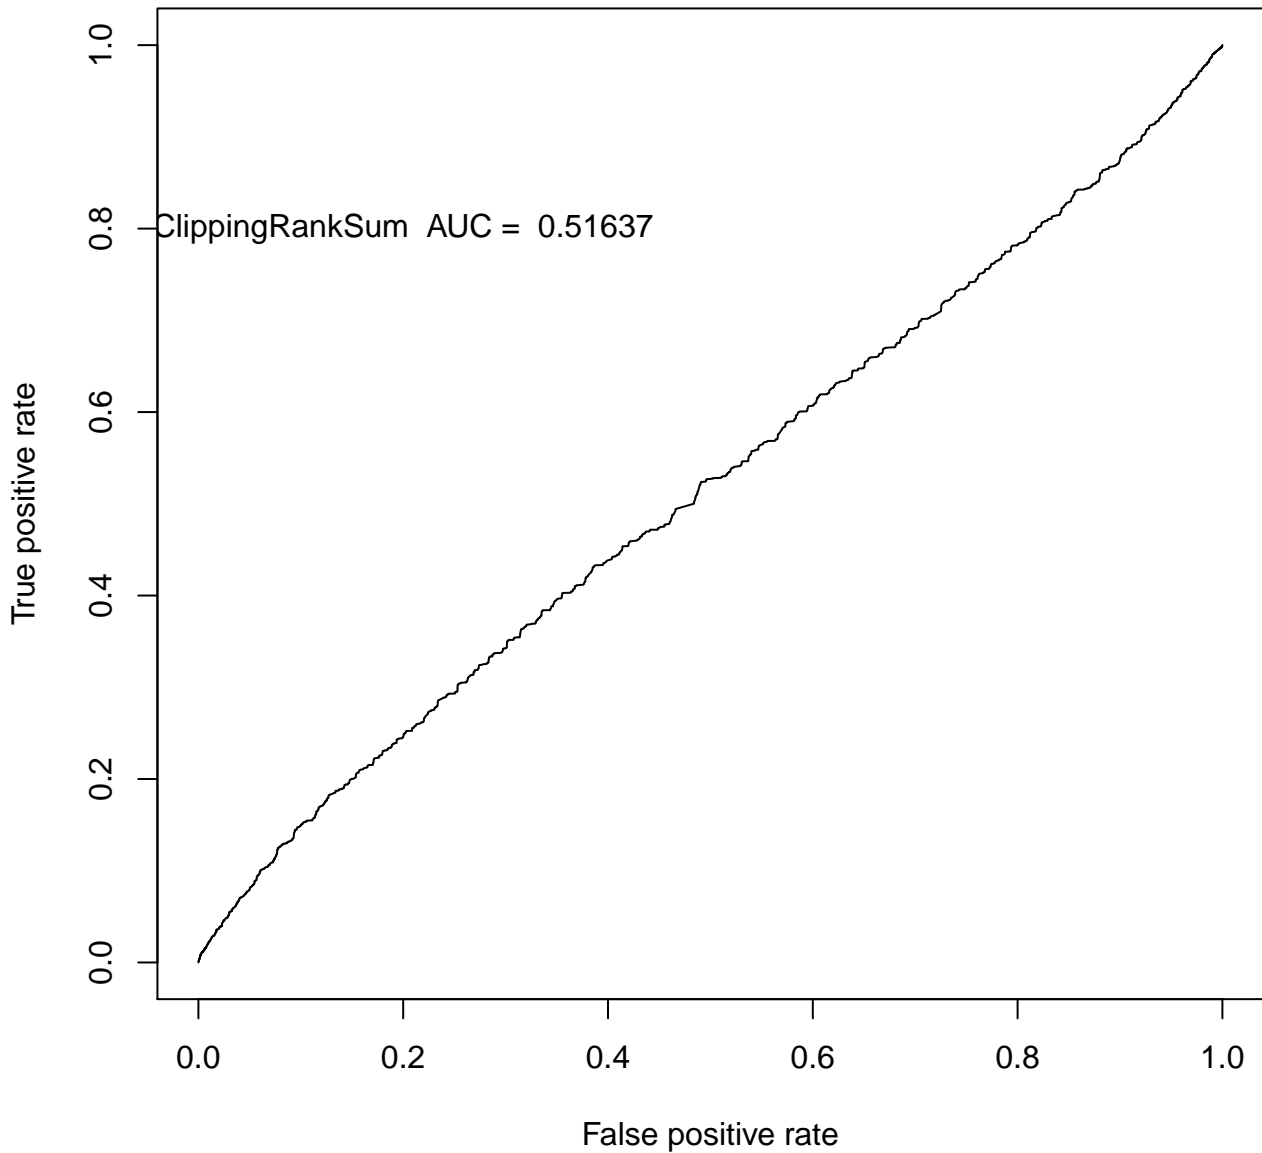

# ROC-plot pp.low.nsnp.hete DP

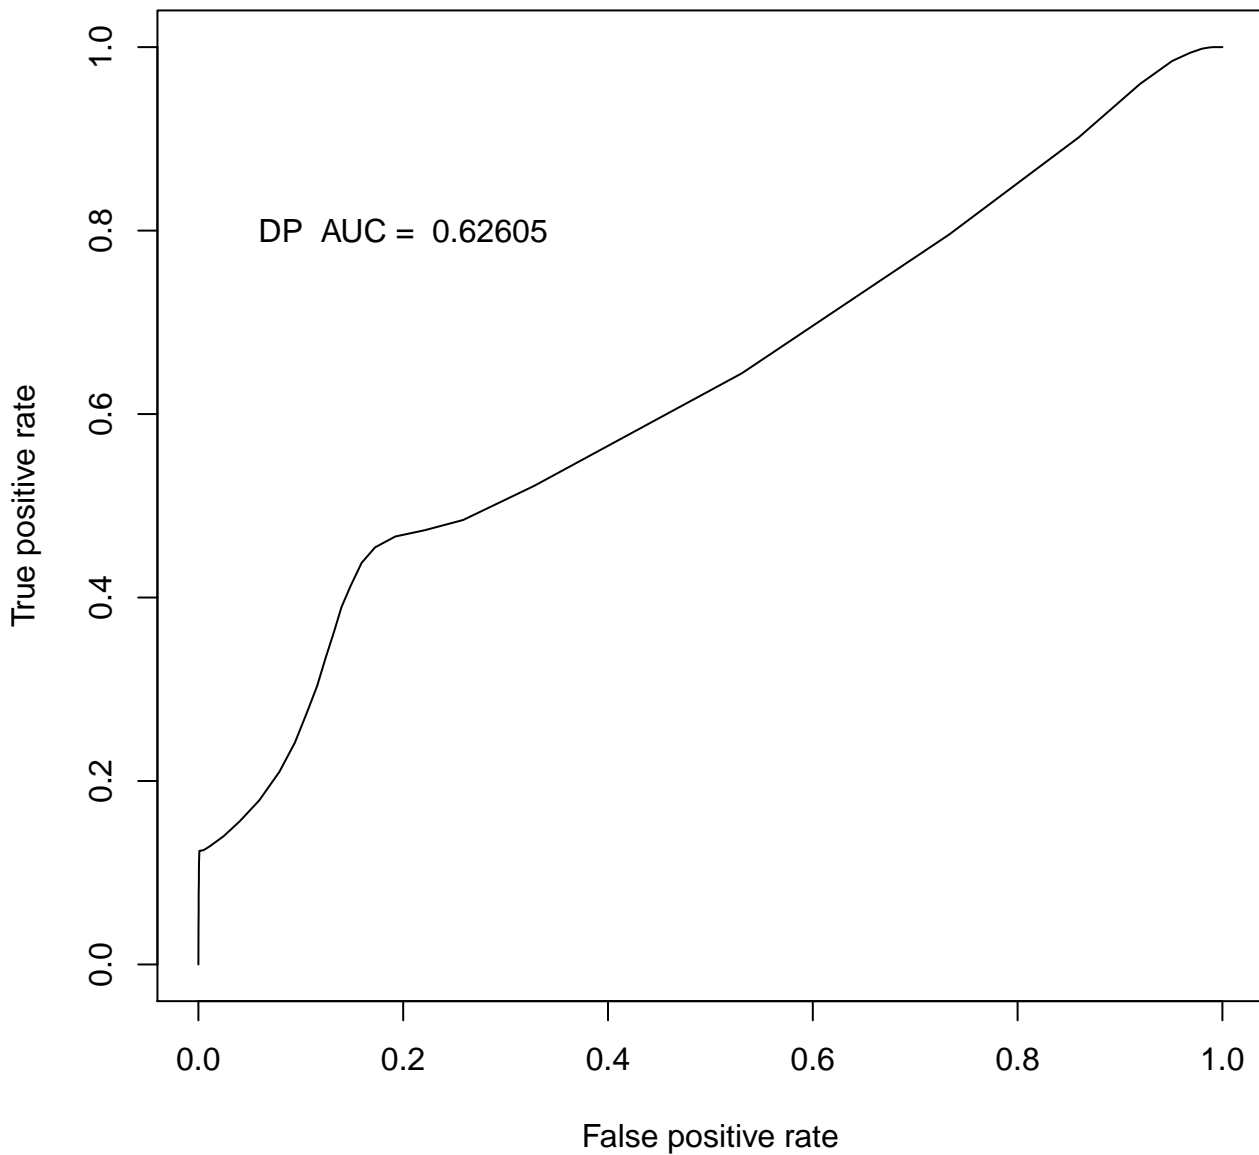

# ROC-plot pp.low.nsnp.hete MQ

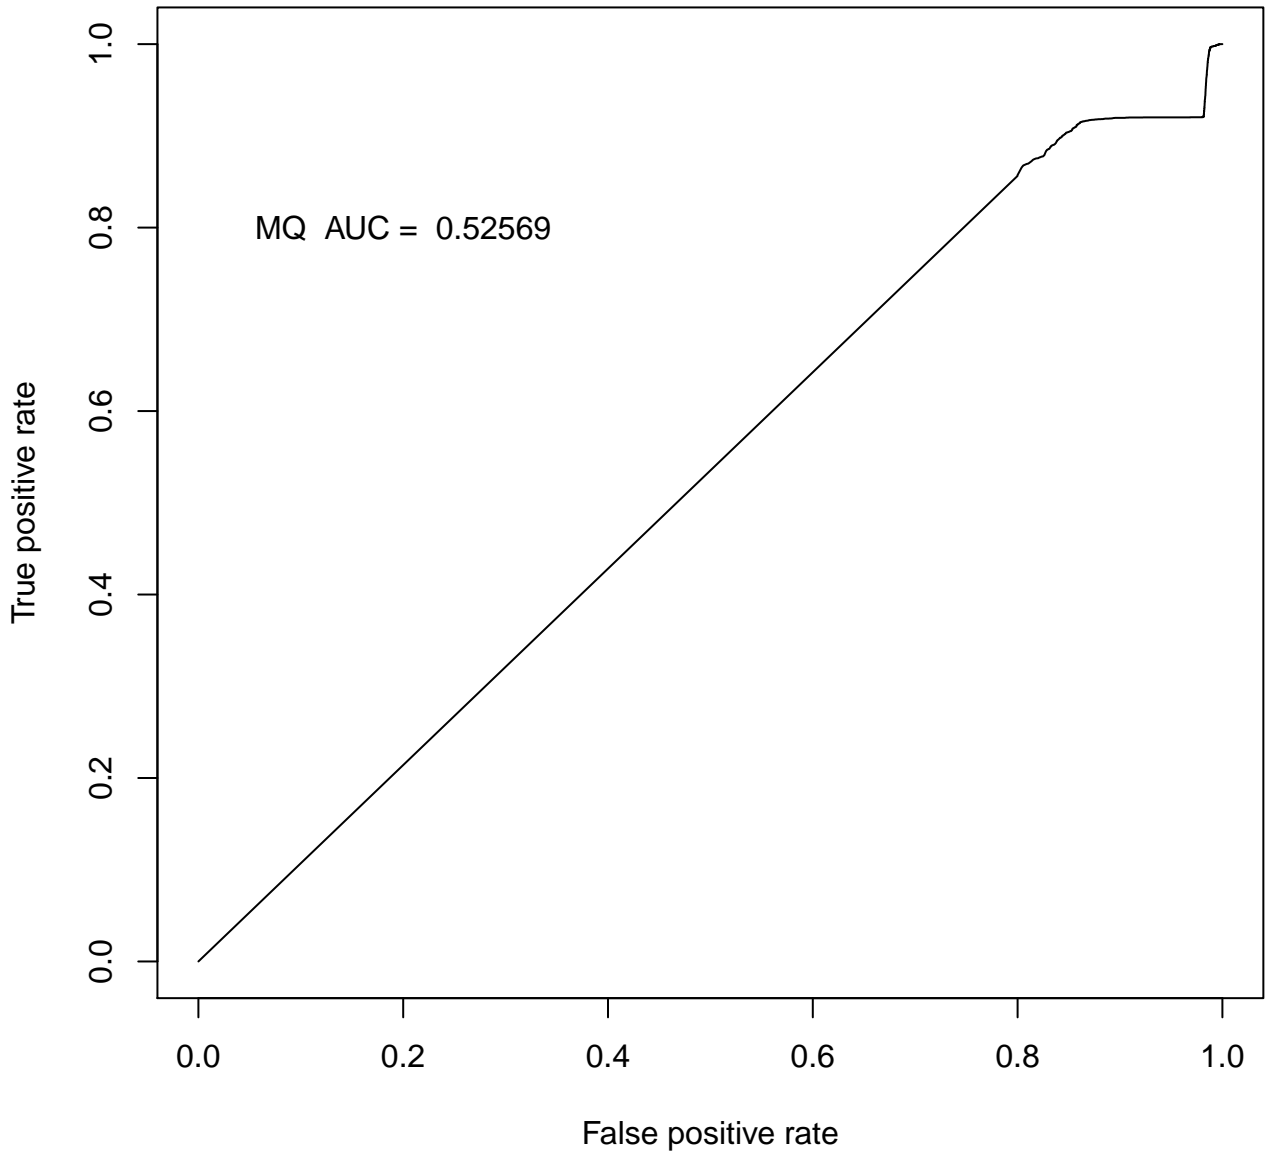

# ROC-plot pp.low.nsnp.hete MQRankSum

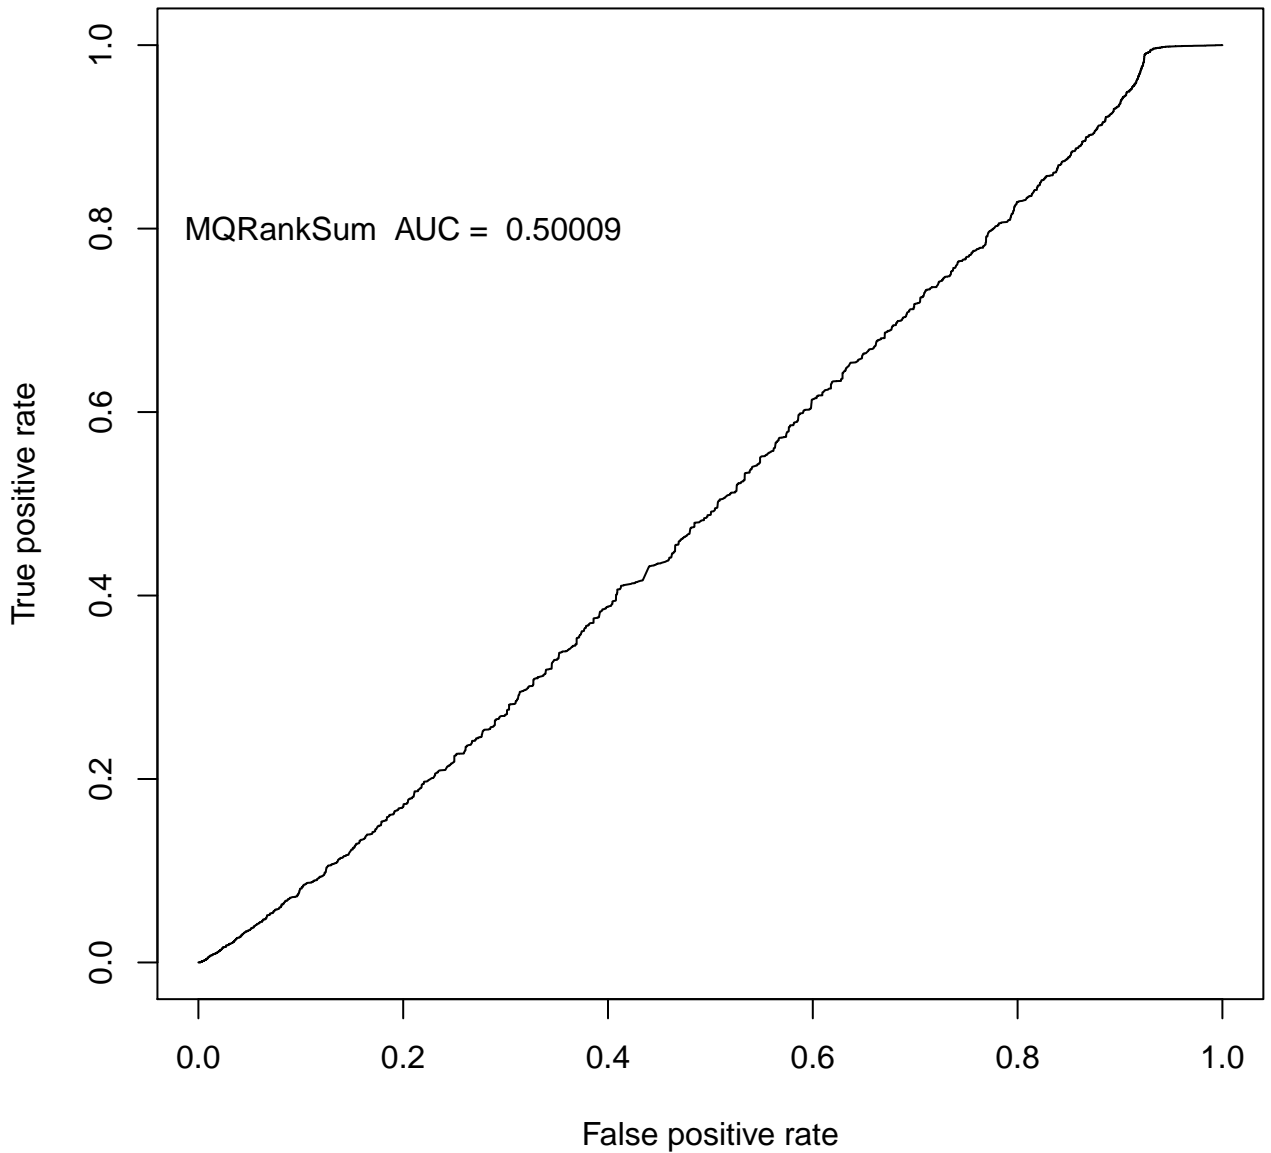

# ROC-plot pp.low.nsnp.hete ReadPosRankSum

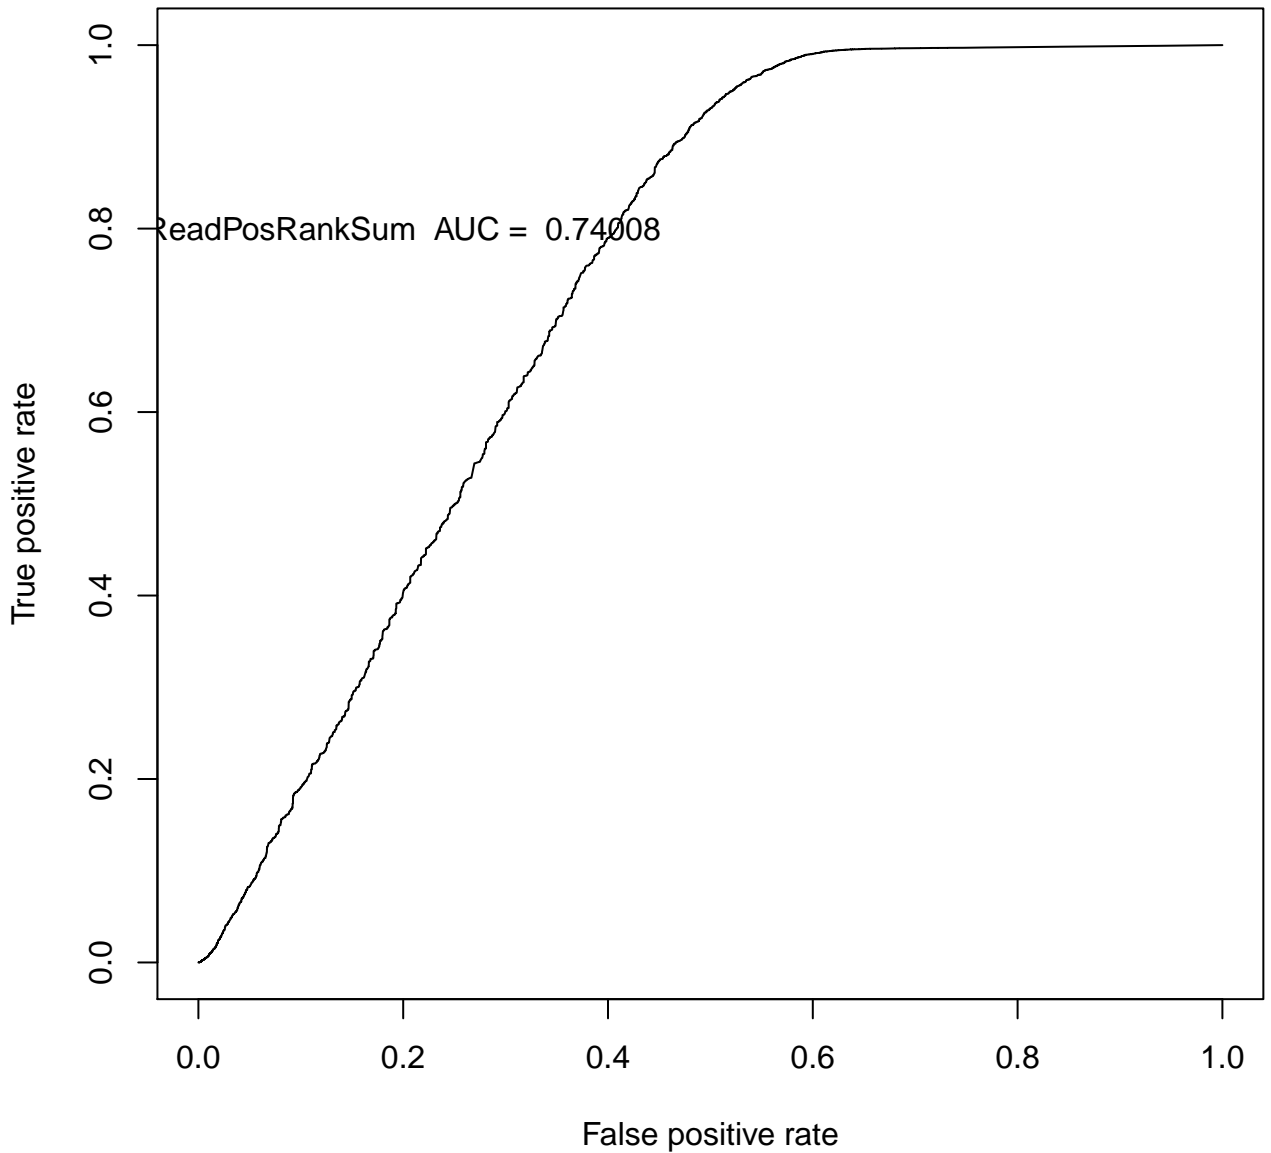

# ROC-plot pp.low.nsnp.hete GQ

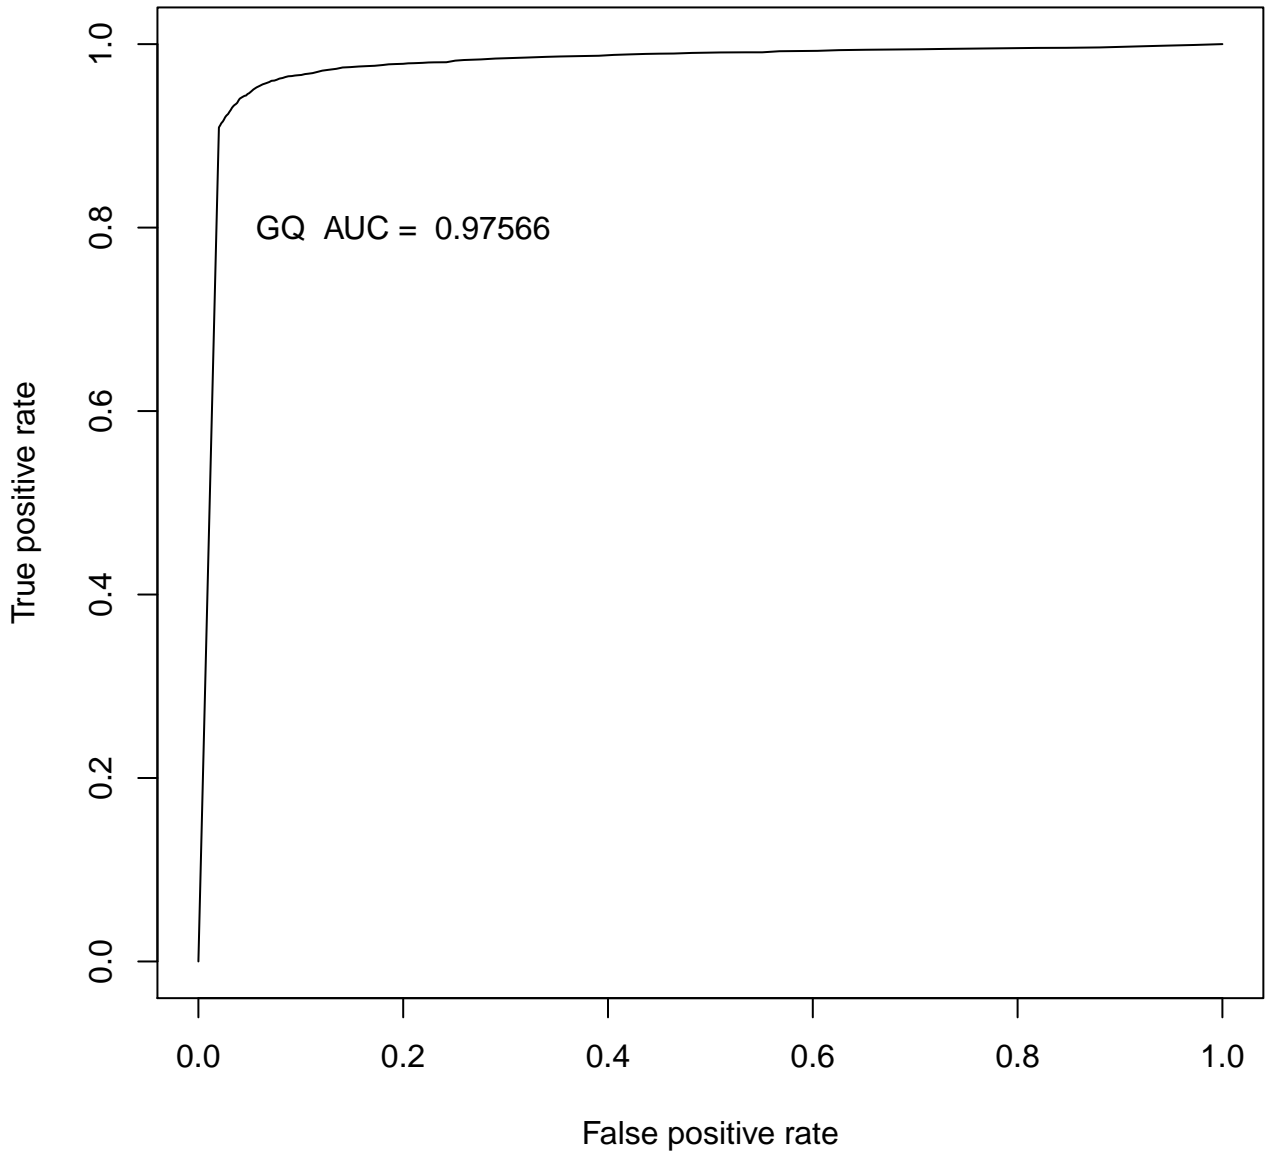

# ROC-plot pp.low.nsnp.hete ADT

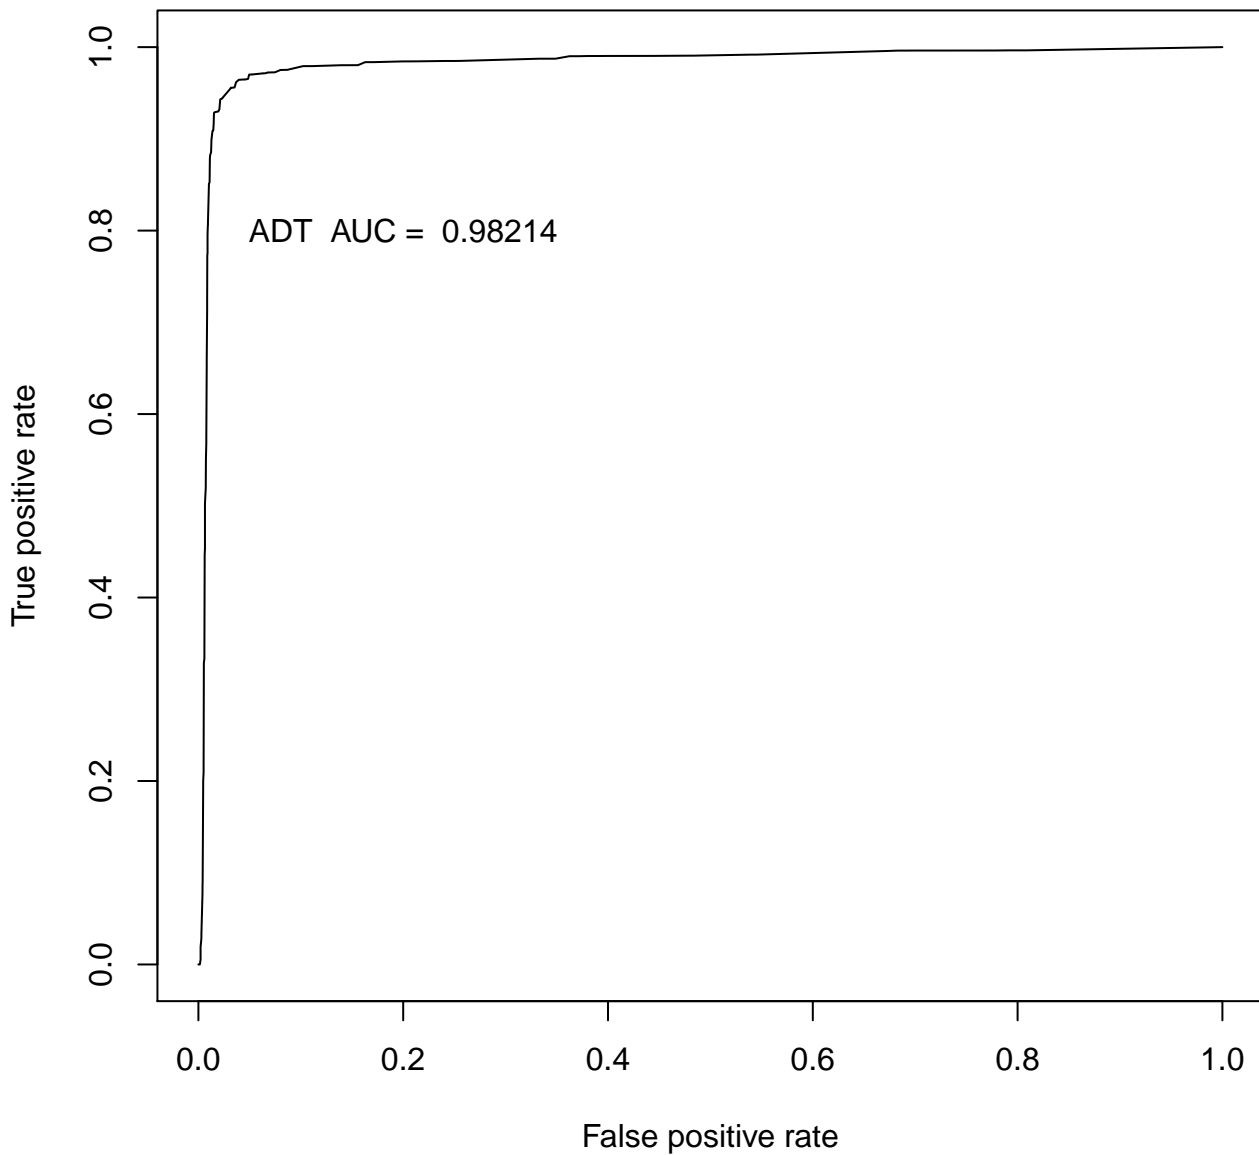



# ROC-plot pp.low.nsnp.hete ADTL

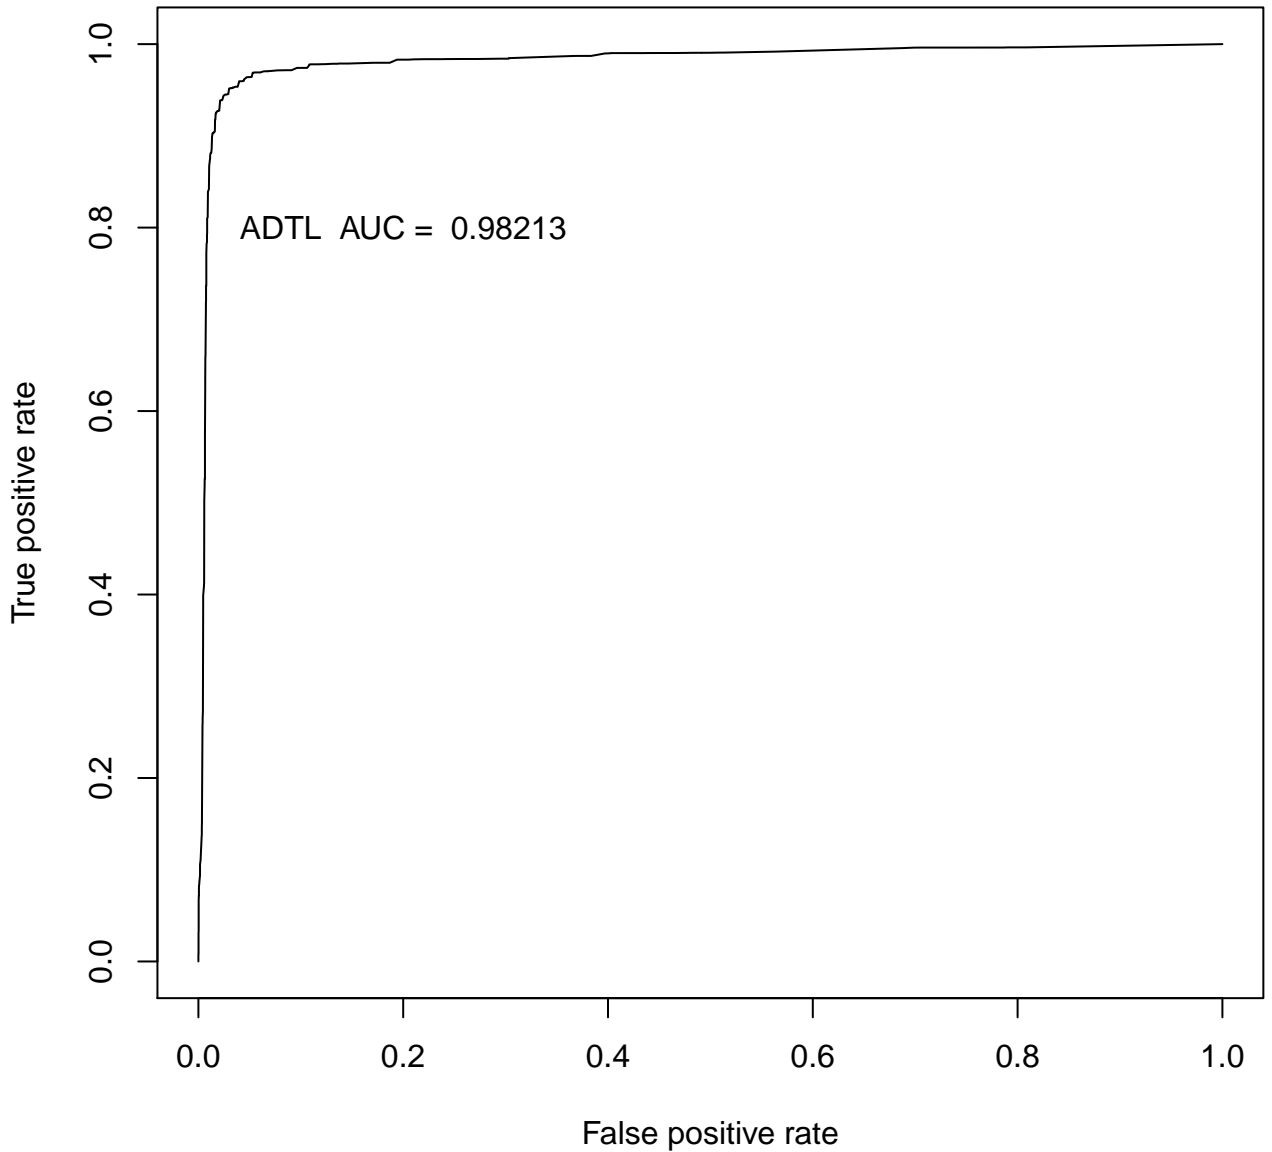

# ROC-plot pp.low.nsnp.hete FS

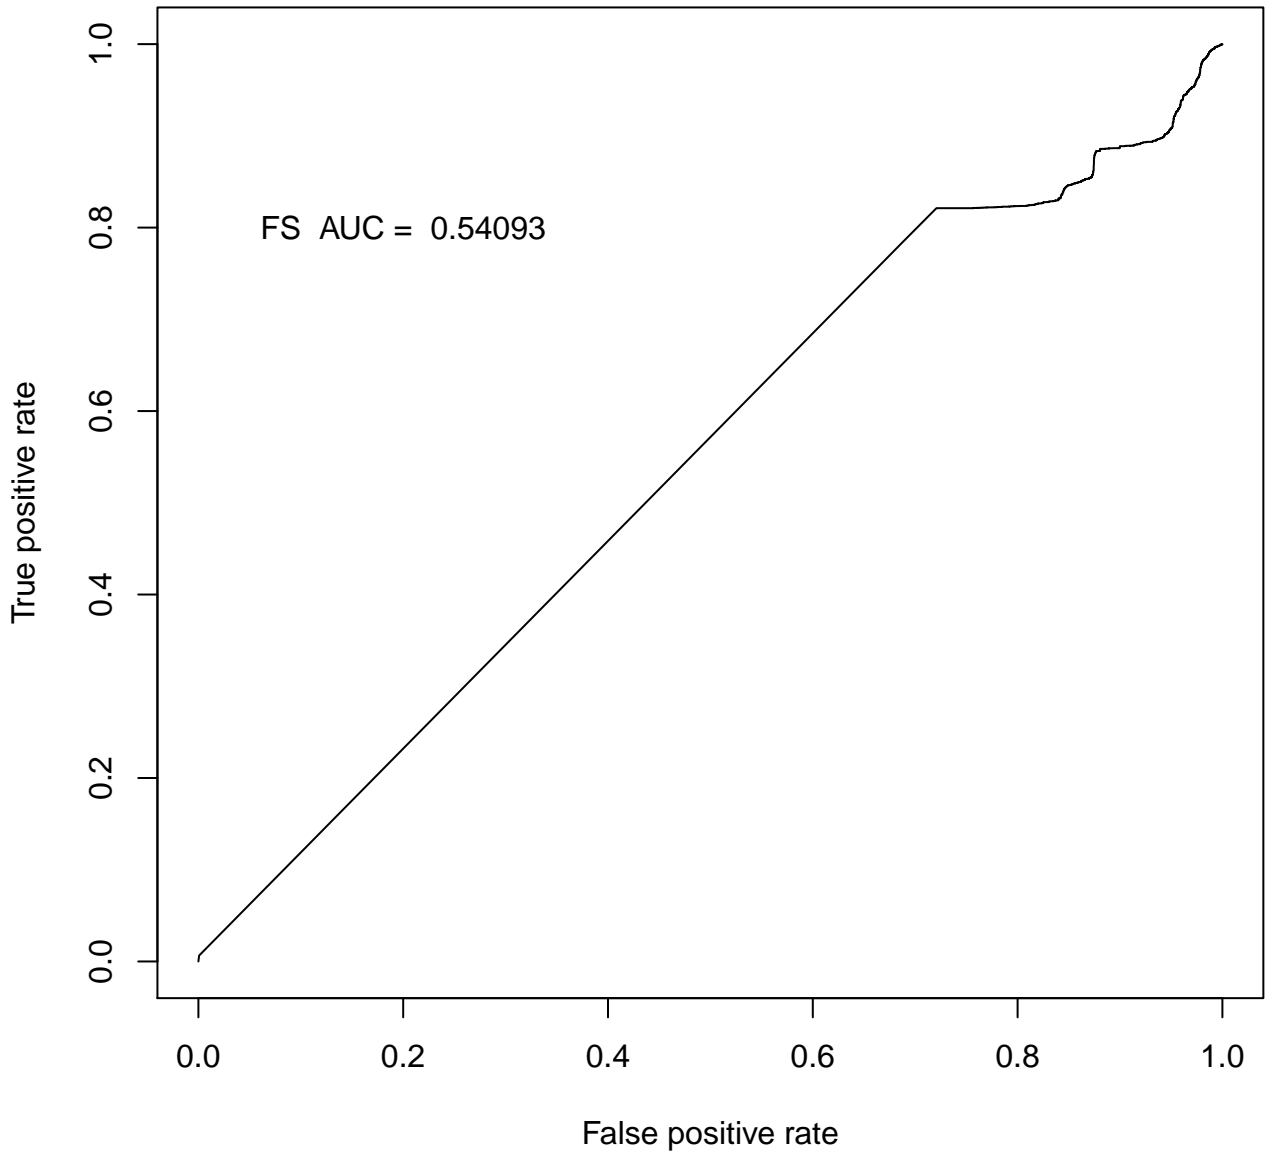

# ROC-plot pp.low.nsnp.homo BaseQRankSum

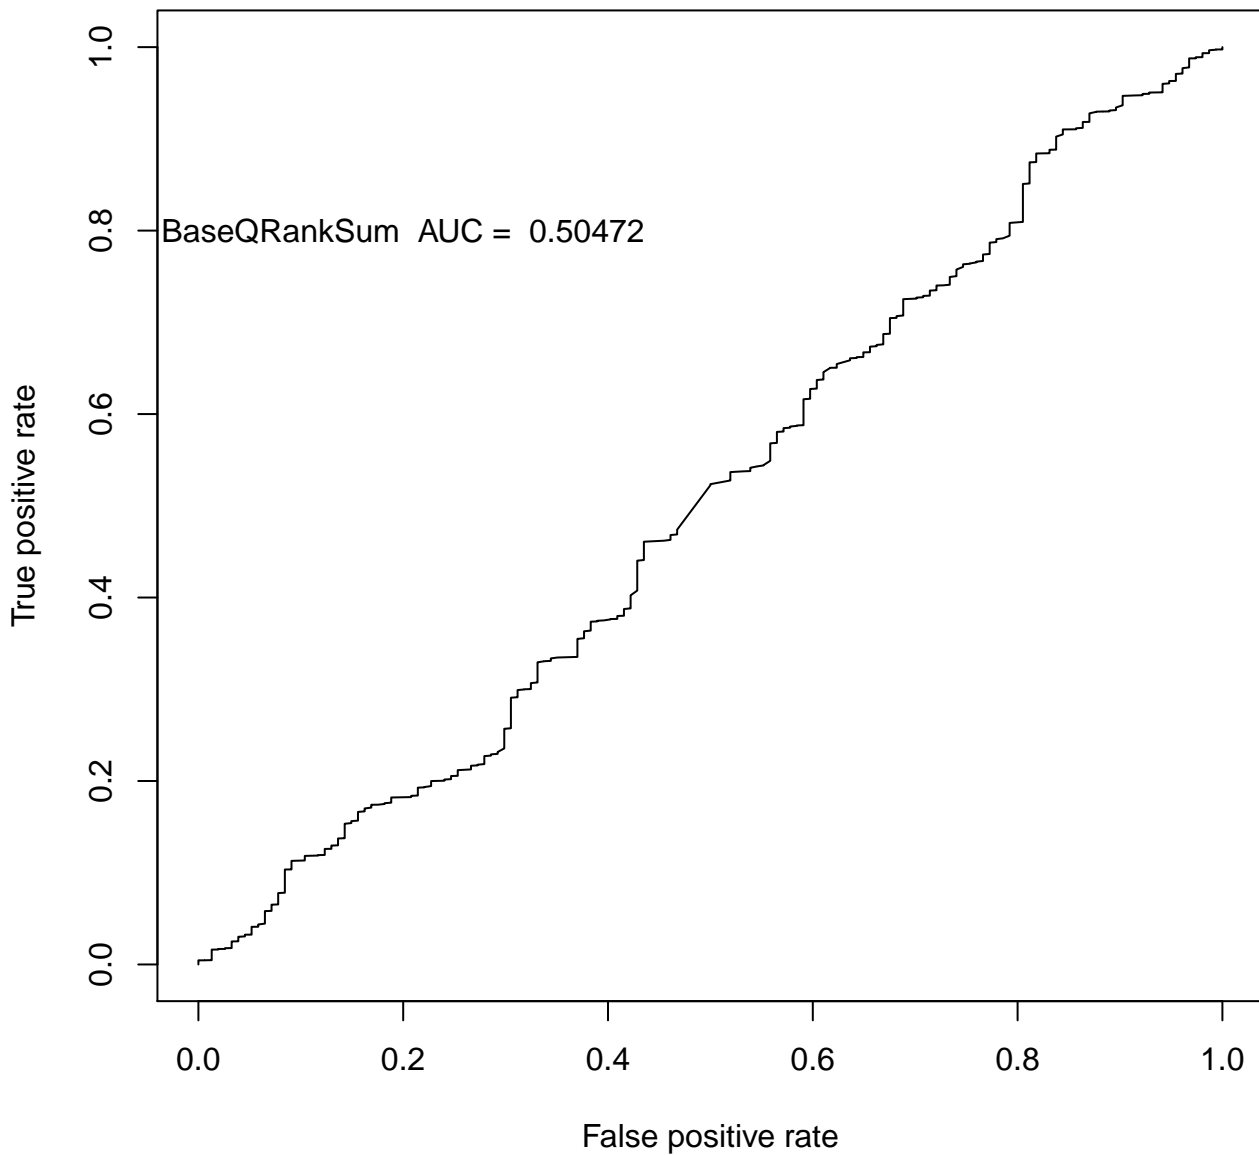

# ROC-plot pp.low.nsnp.homo ClippingRankSum

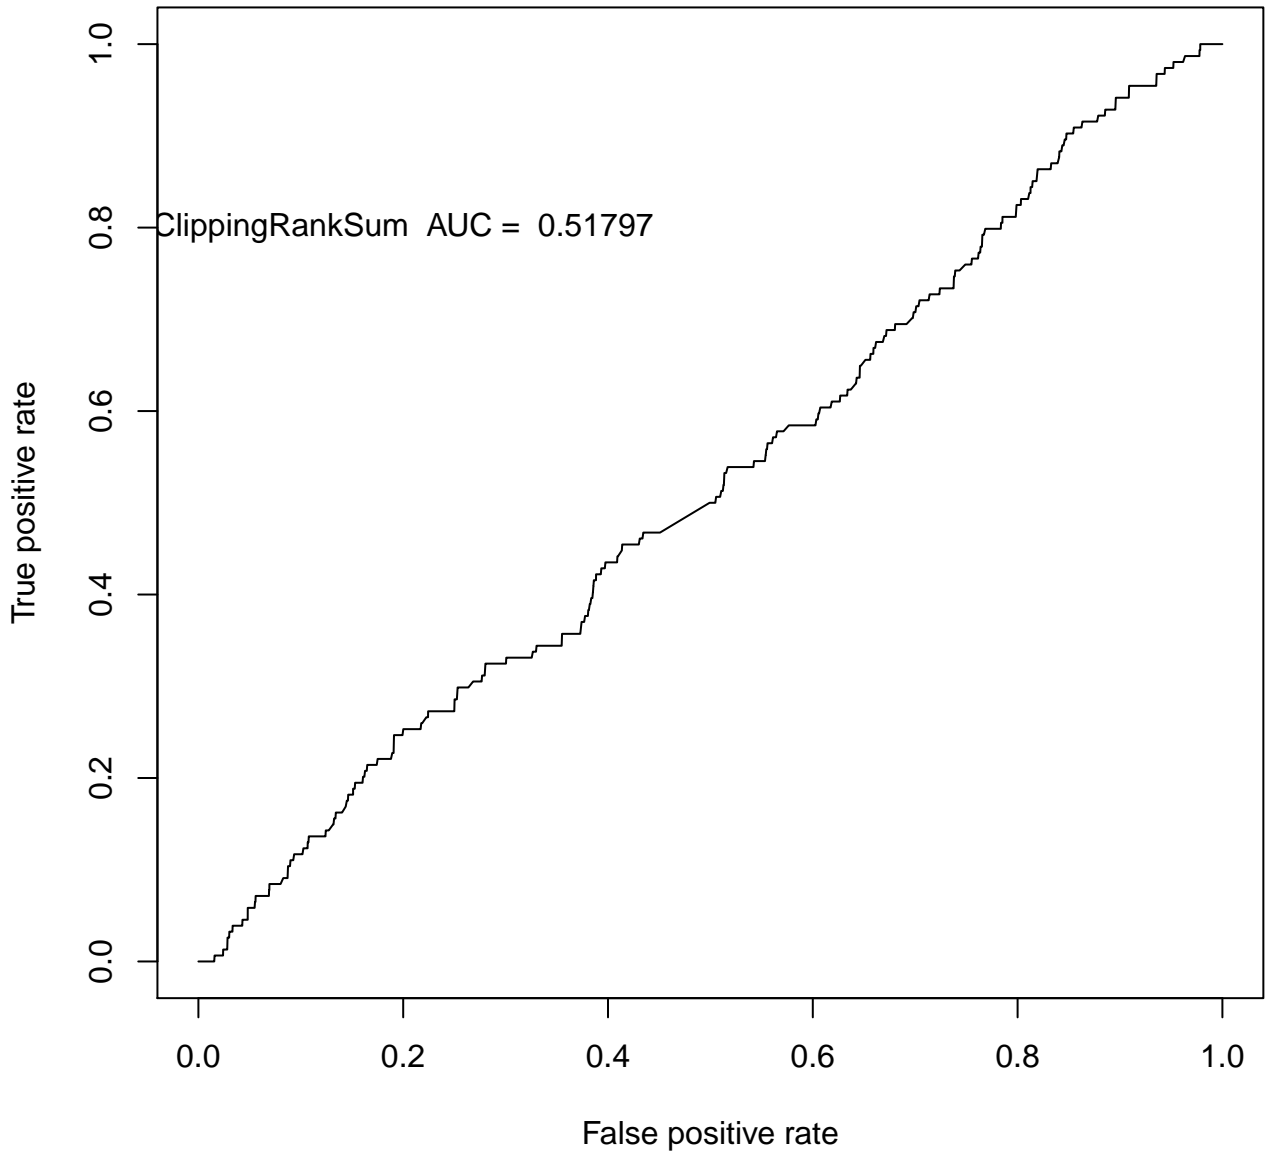

# ROC-plot pp.low.nsnp.homo DP

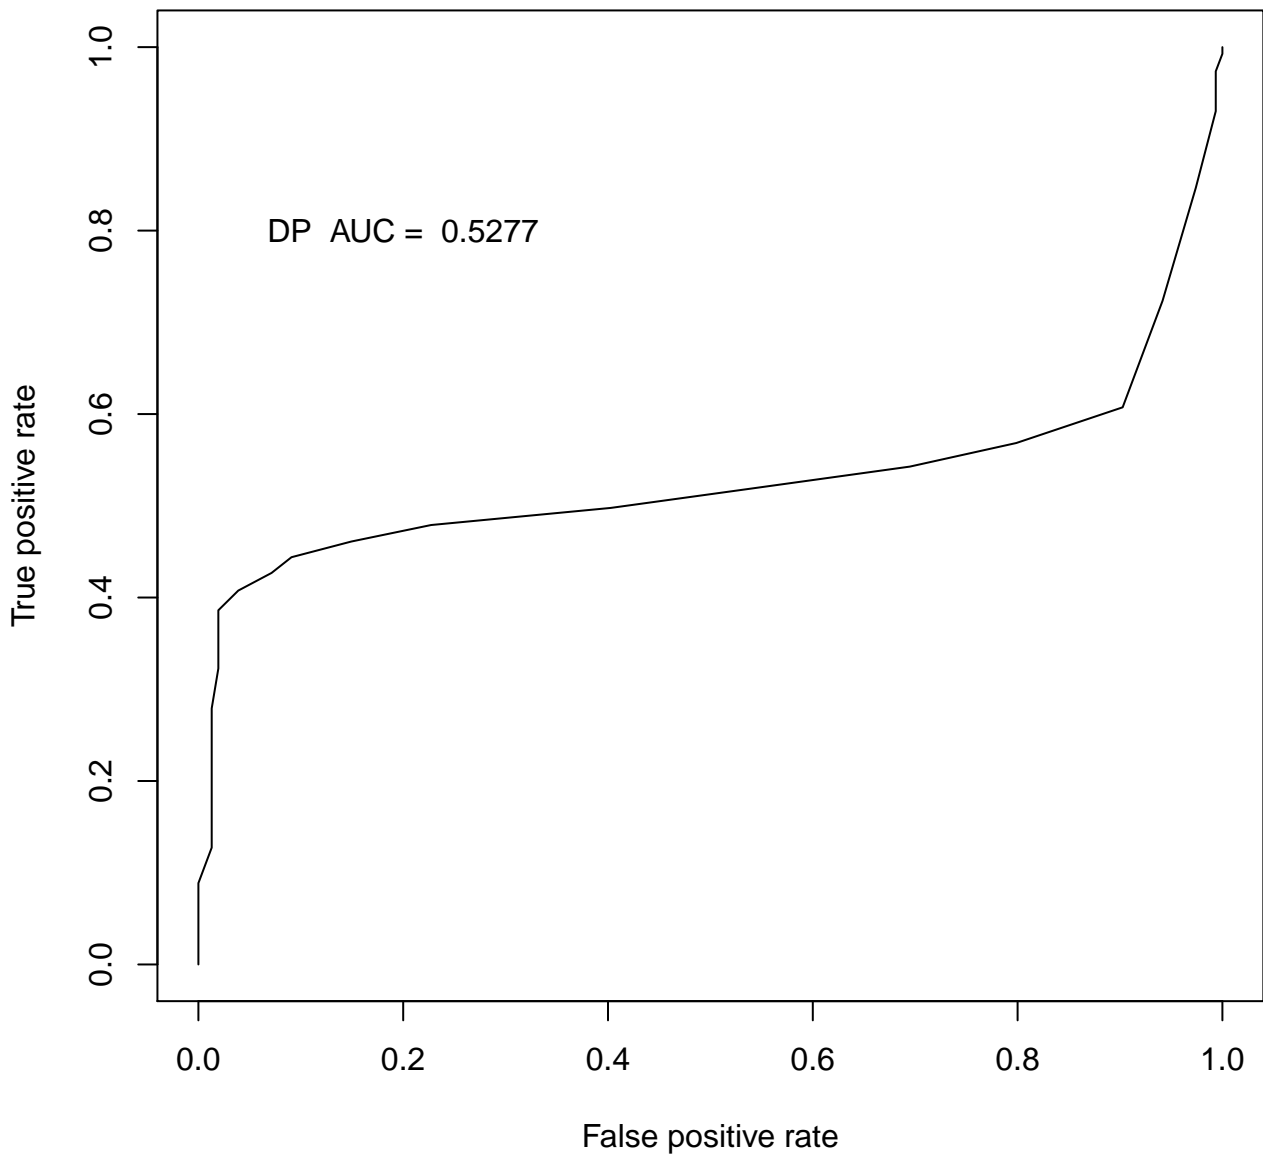

# ROC-plot pp.low.nsnp.homo MQ

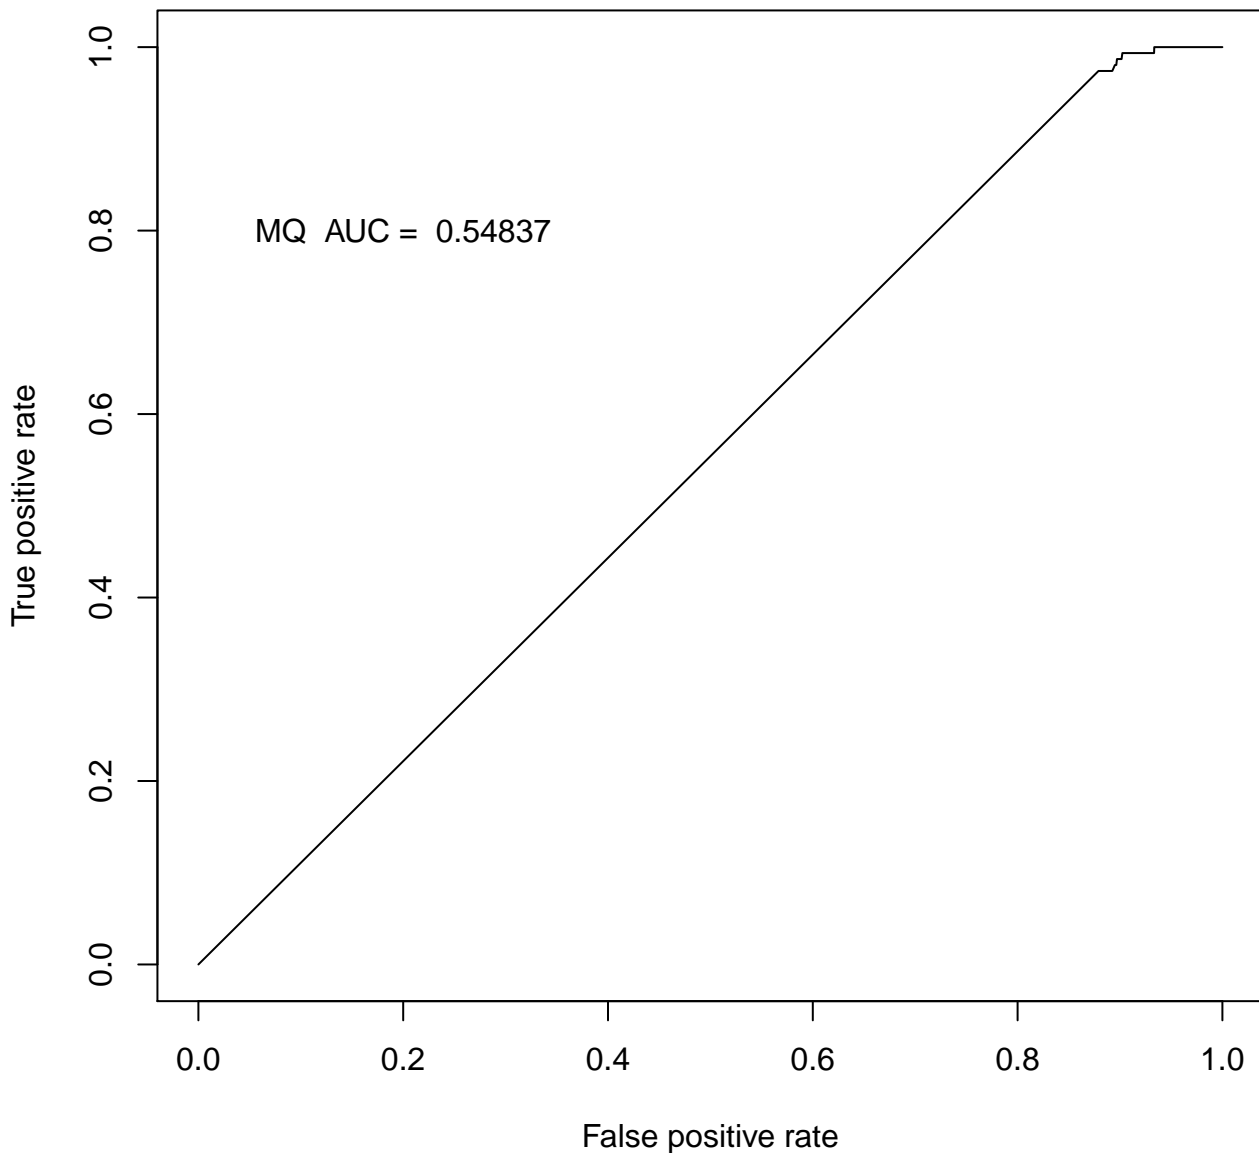

# ROC-plot pp.low.nsnp.homo MQRankSum

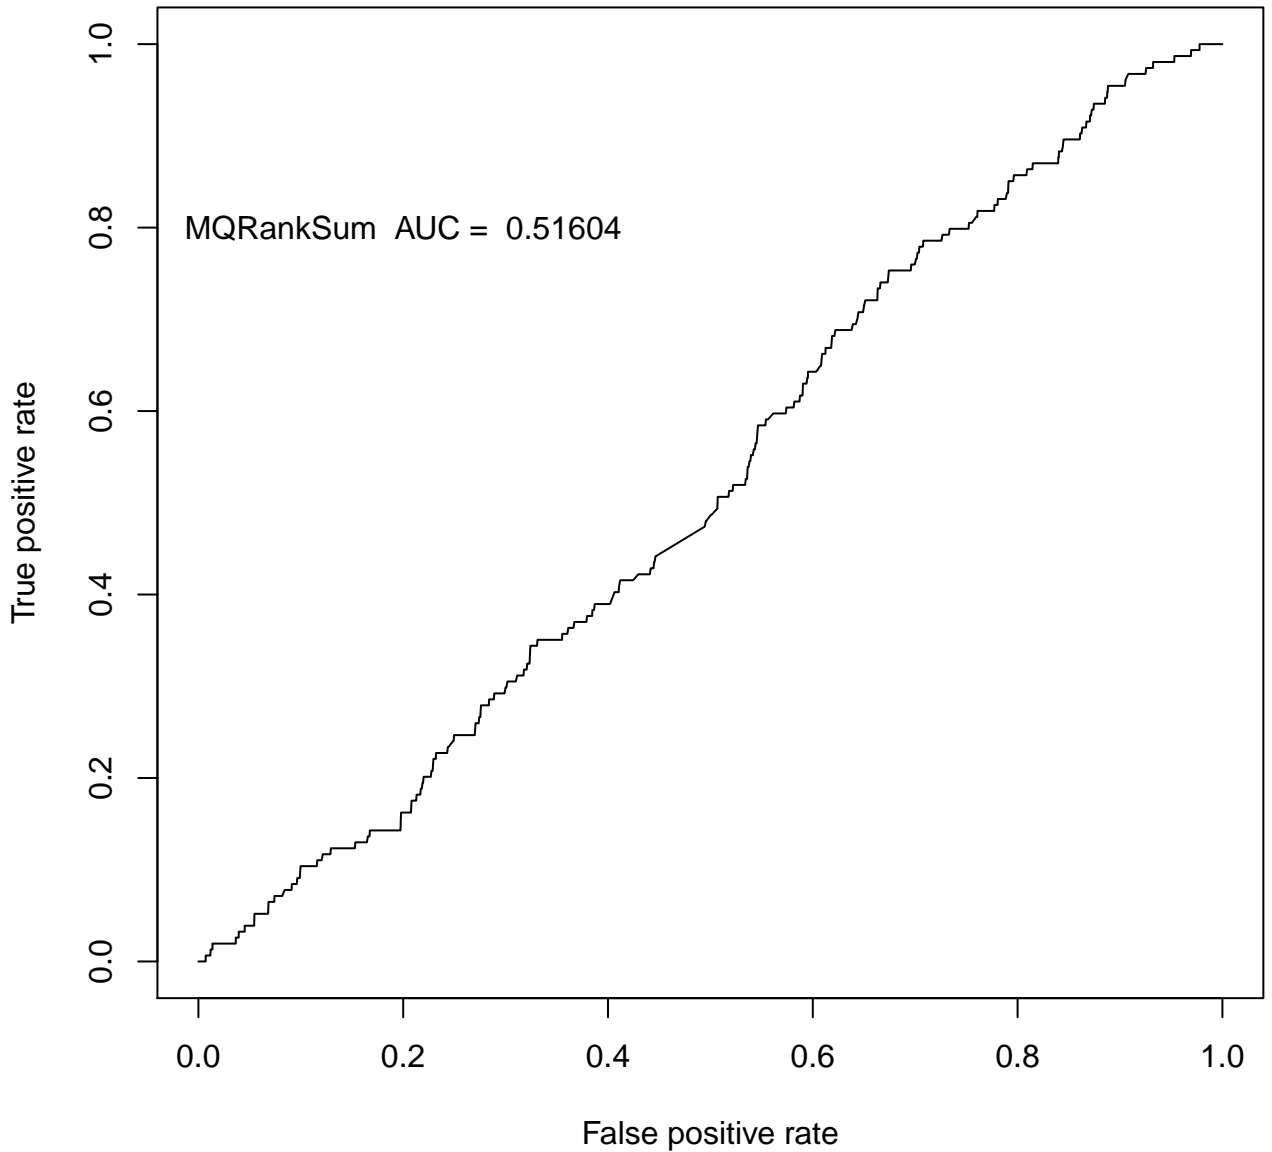

# ROC-plot pp.low.nsnp.homo ReadPosRankSum

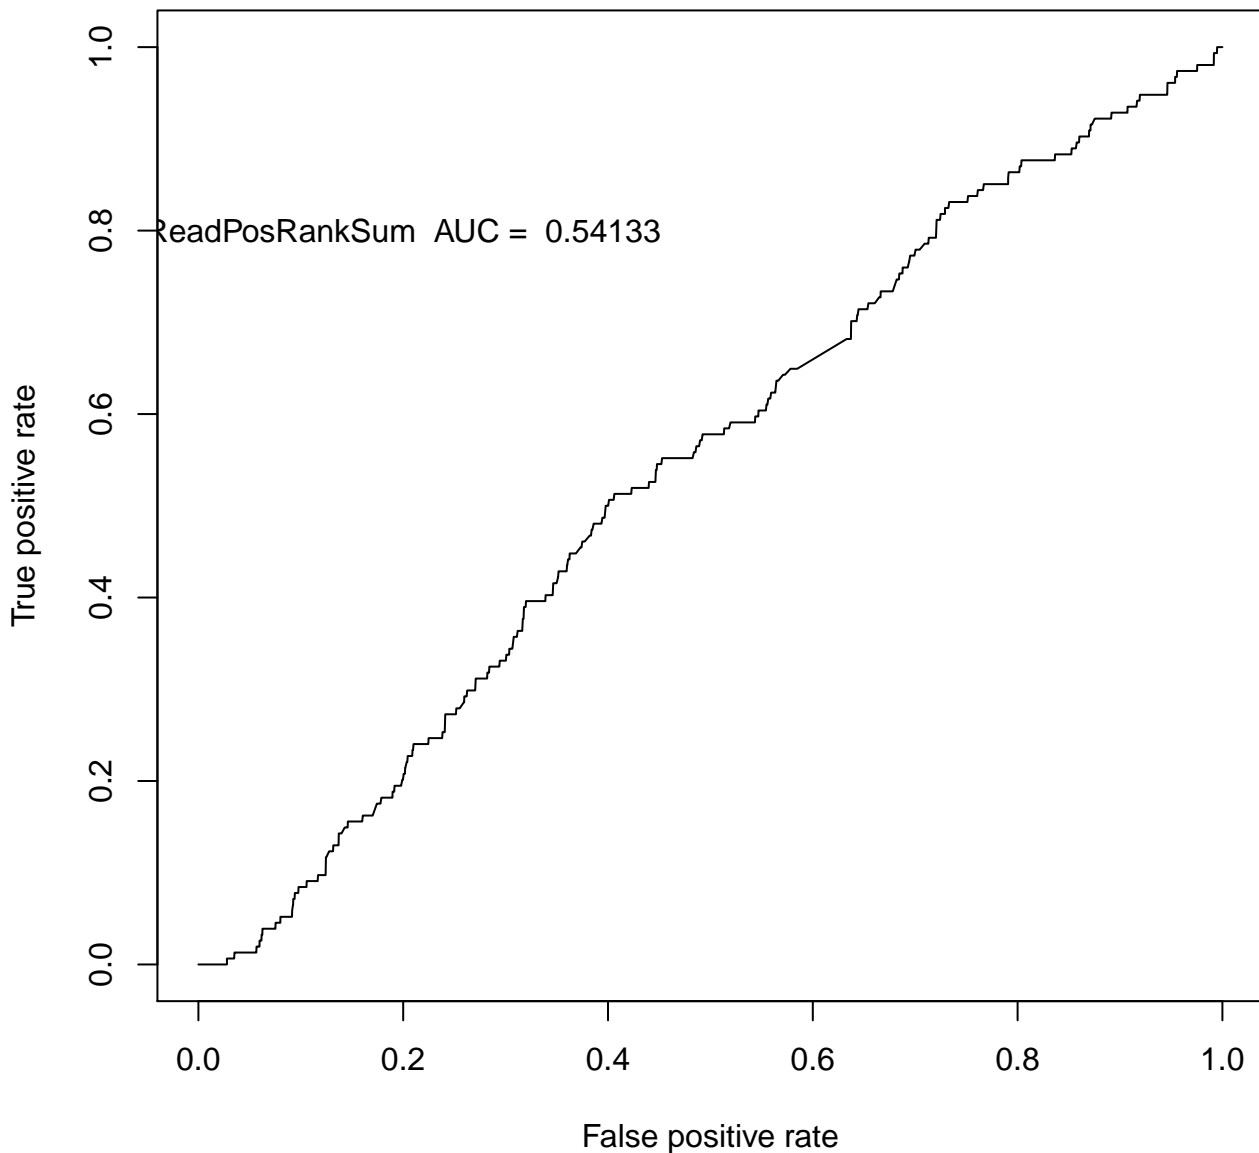



# ROC-plot pp.low.nsnp.homo GQ

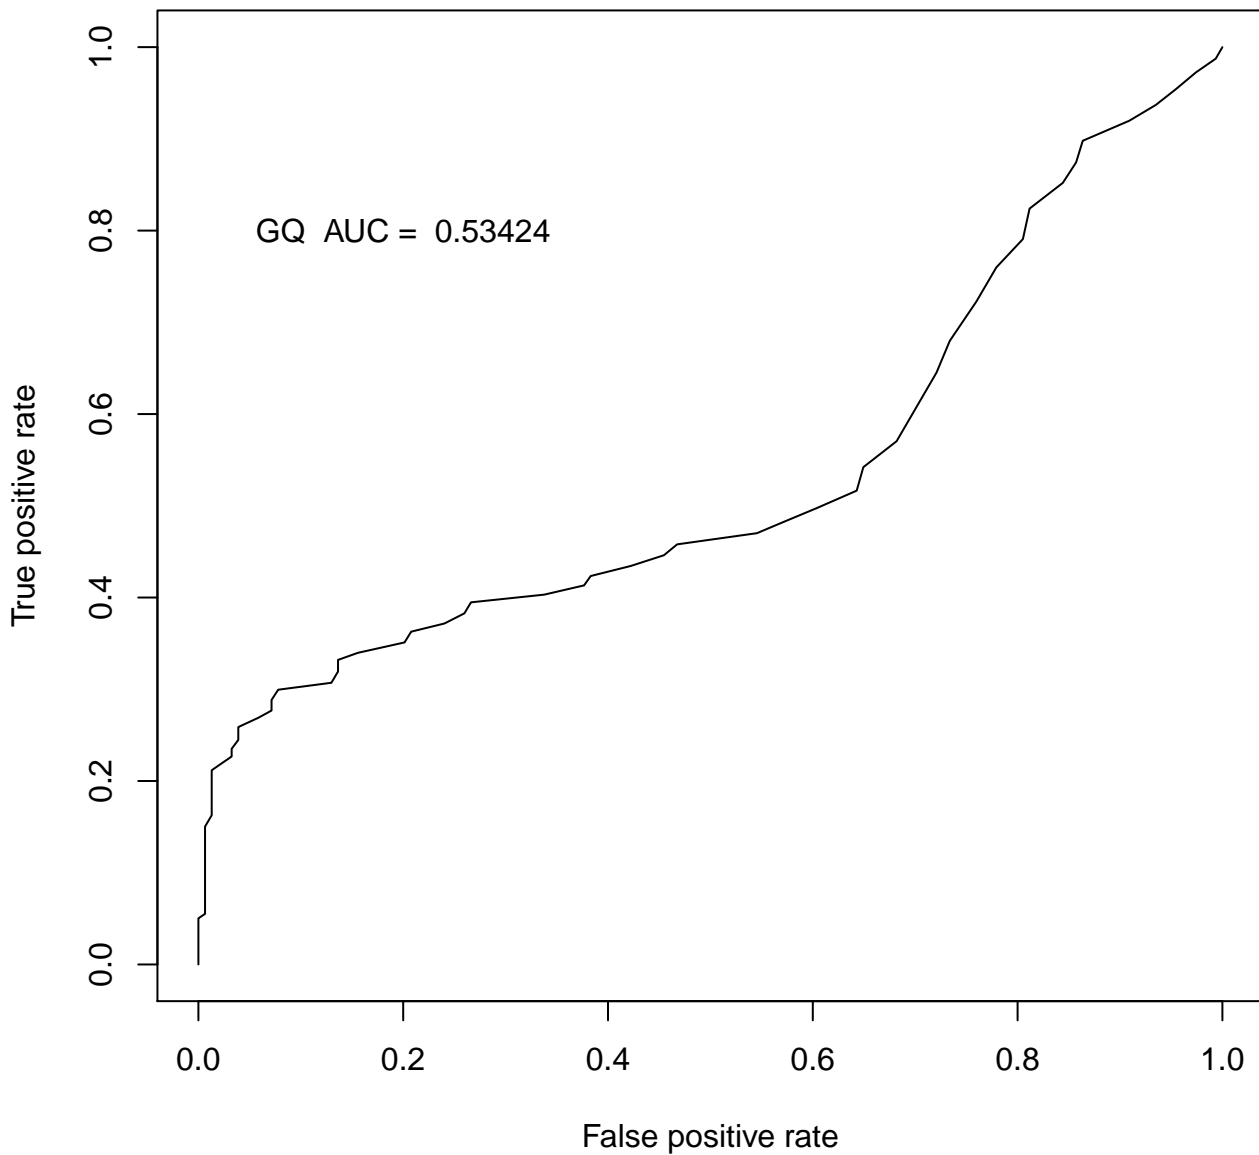

# ROC-plot pp.low.nsnp.homo ADT

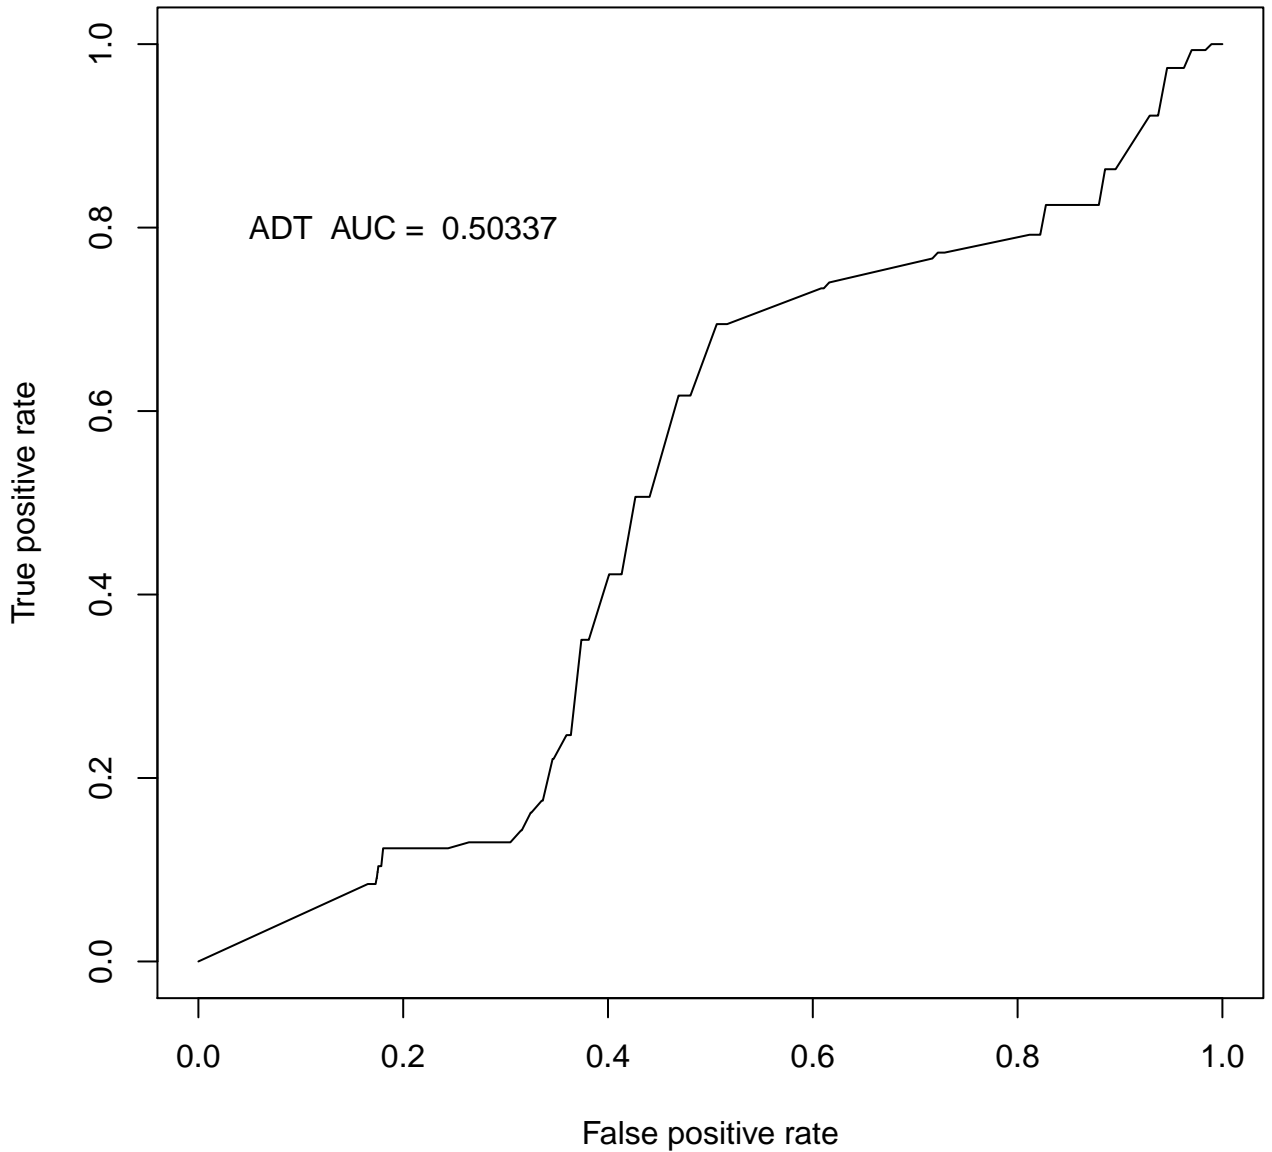

# ROC-plot pp.low.nsnp.homo ADTL

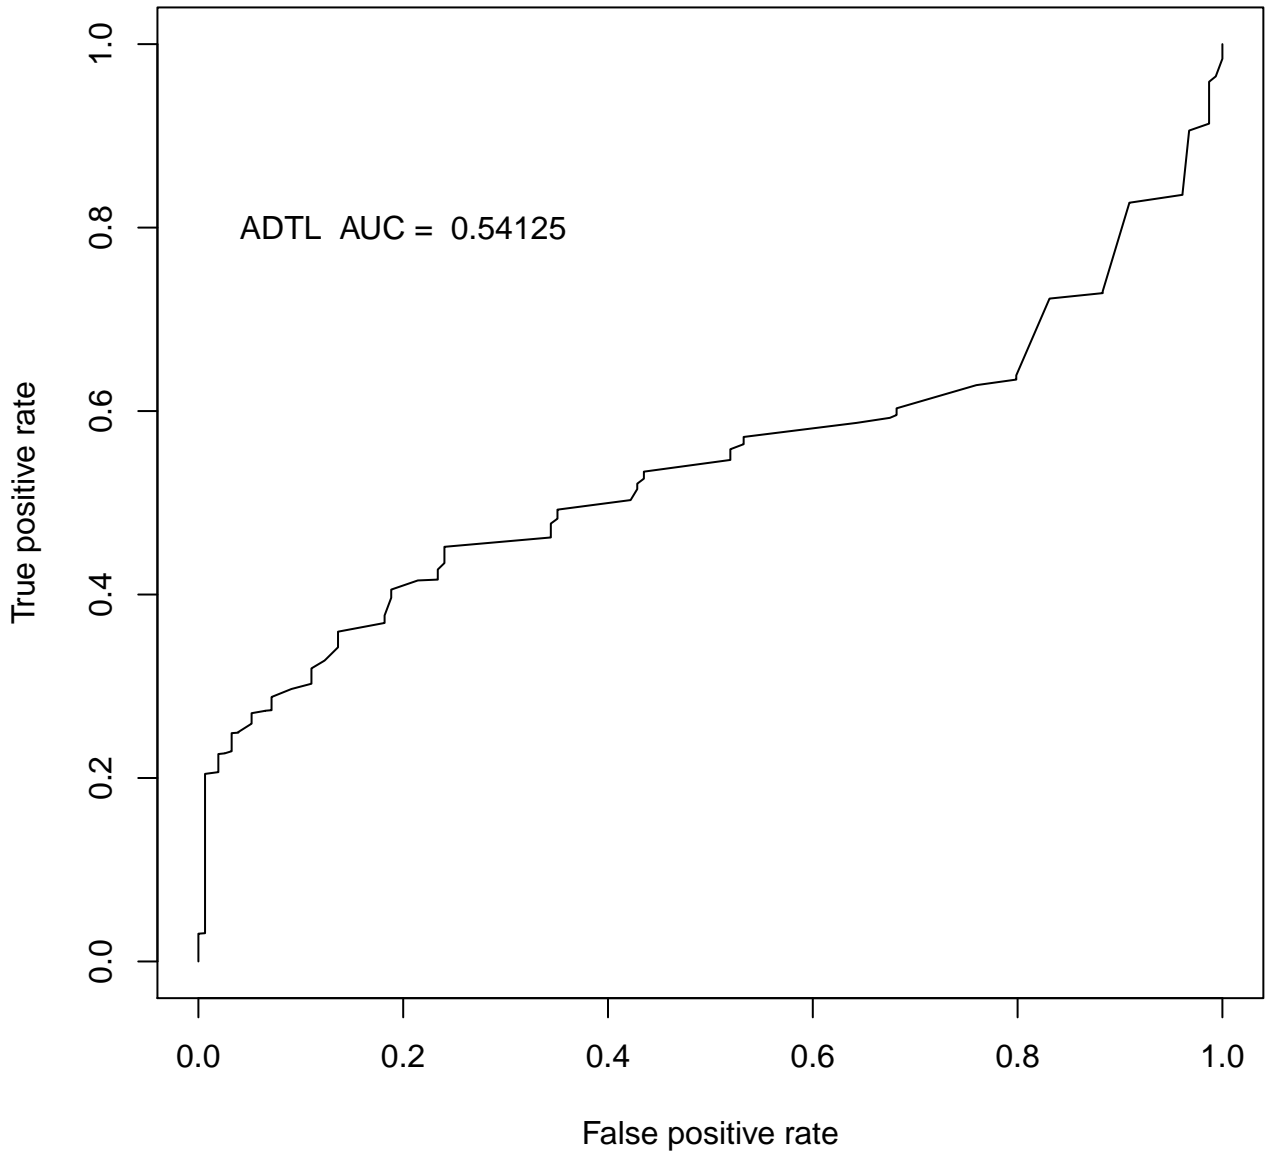

# ROC-plot pp.low.nsnp.homo FS

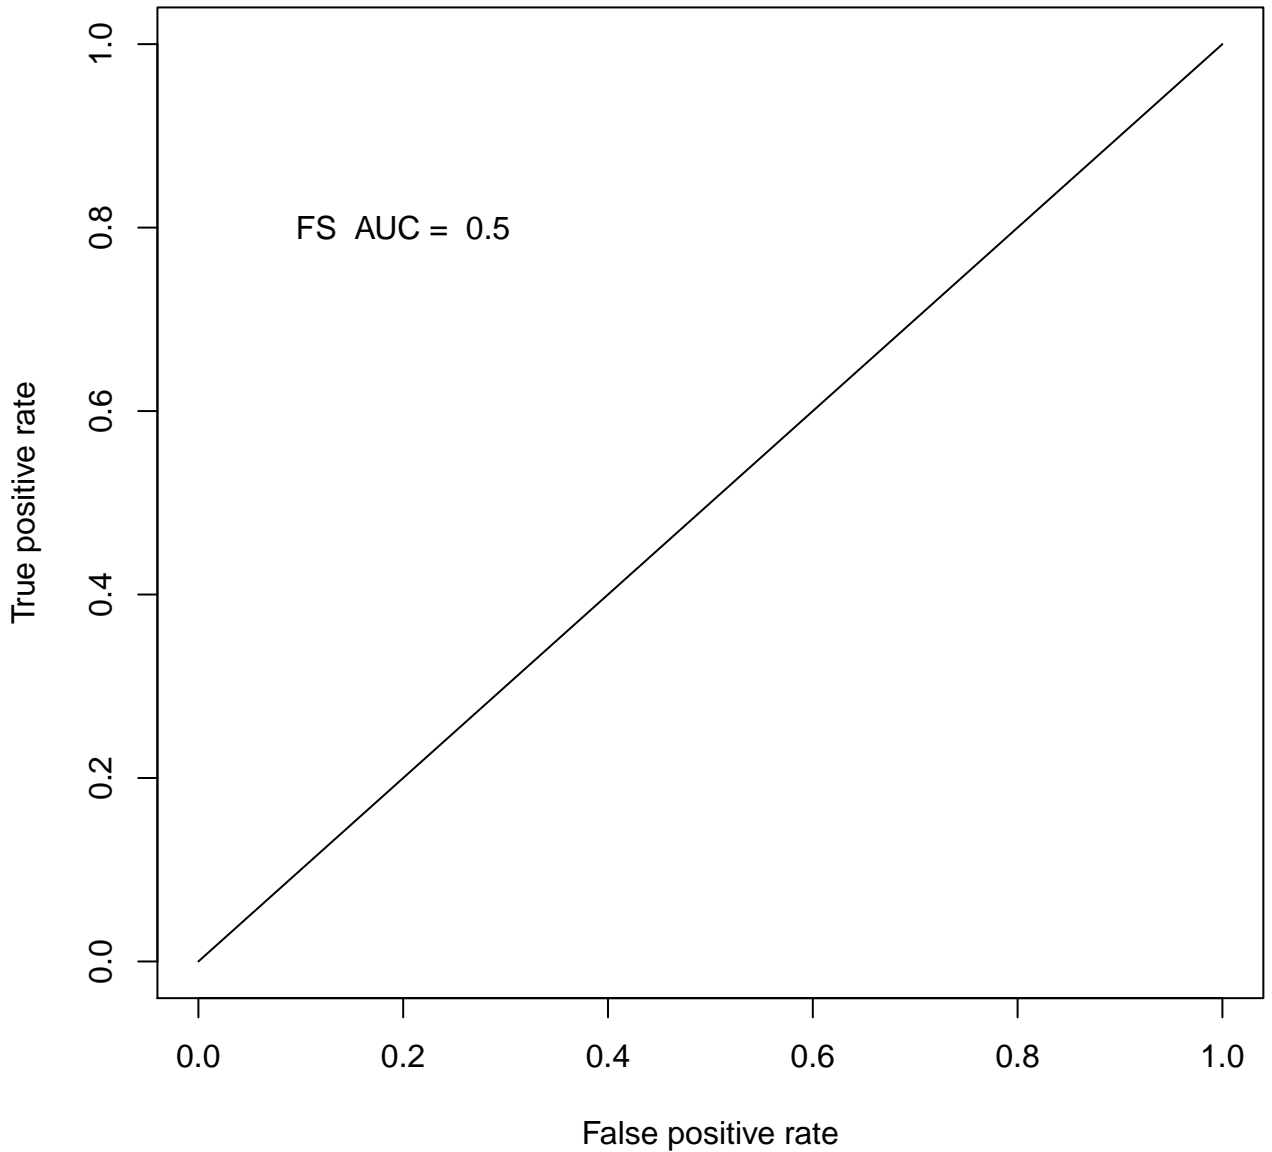

# ROC-plot pp.low.snp.hete BaseQRankSum

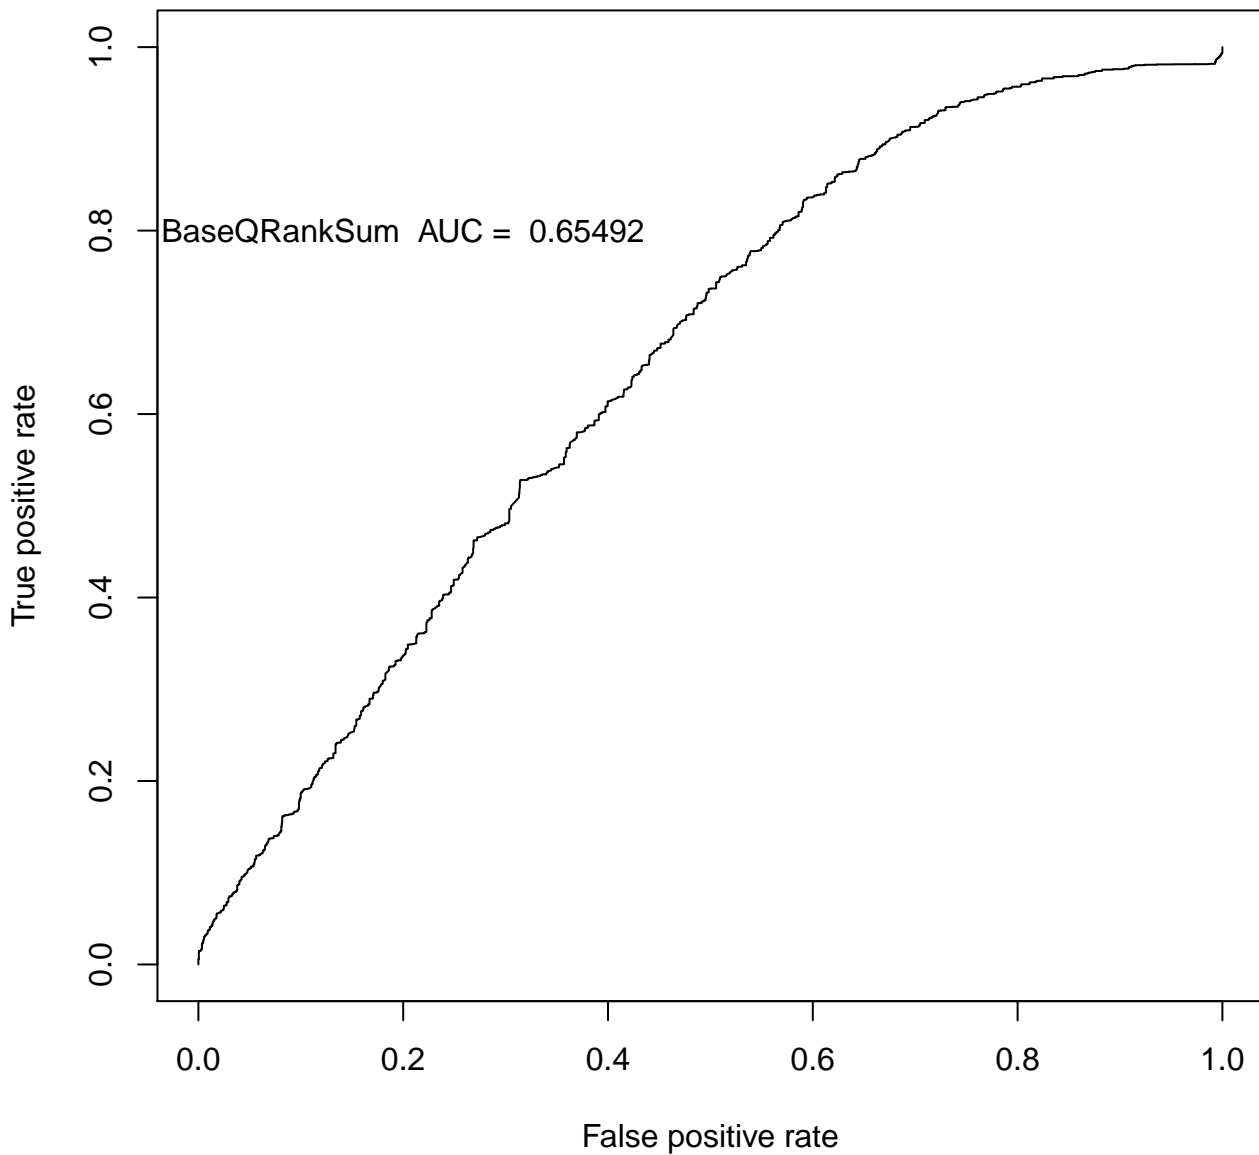

# ROC-plot pp.low.snp.hete ClippingRankSum

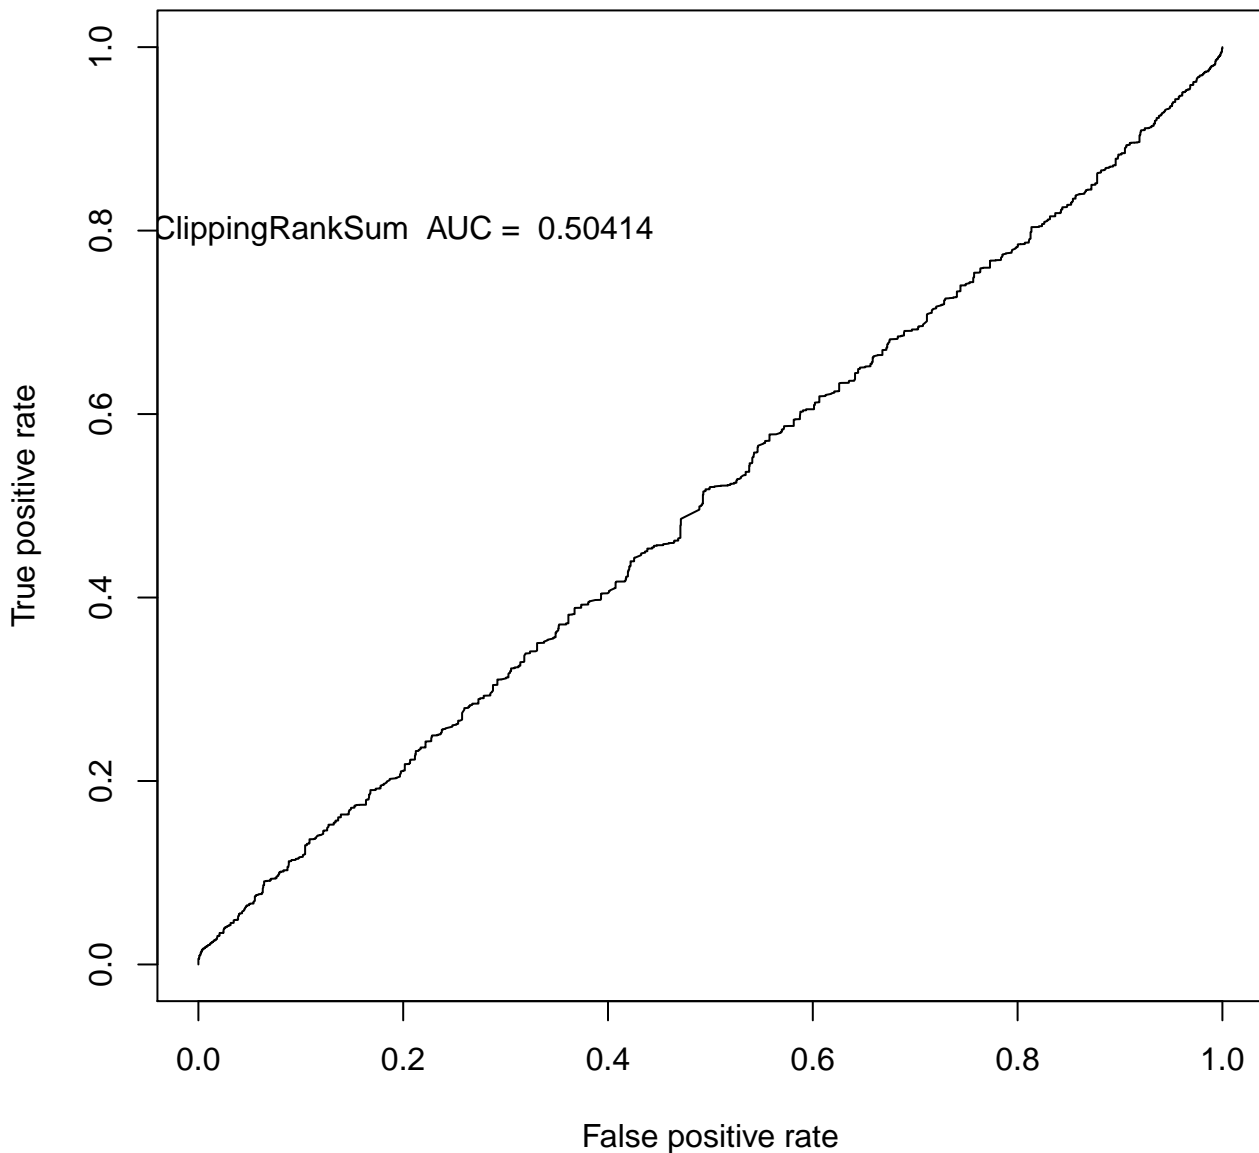

ROC-plot pp.low.snp.hete DP

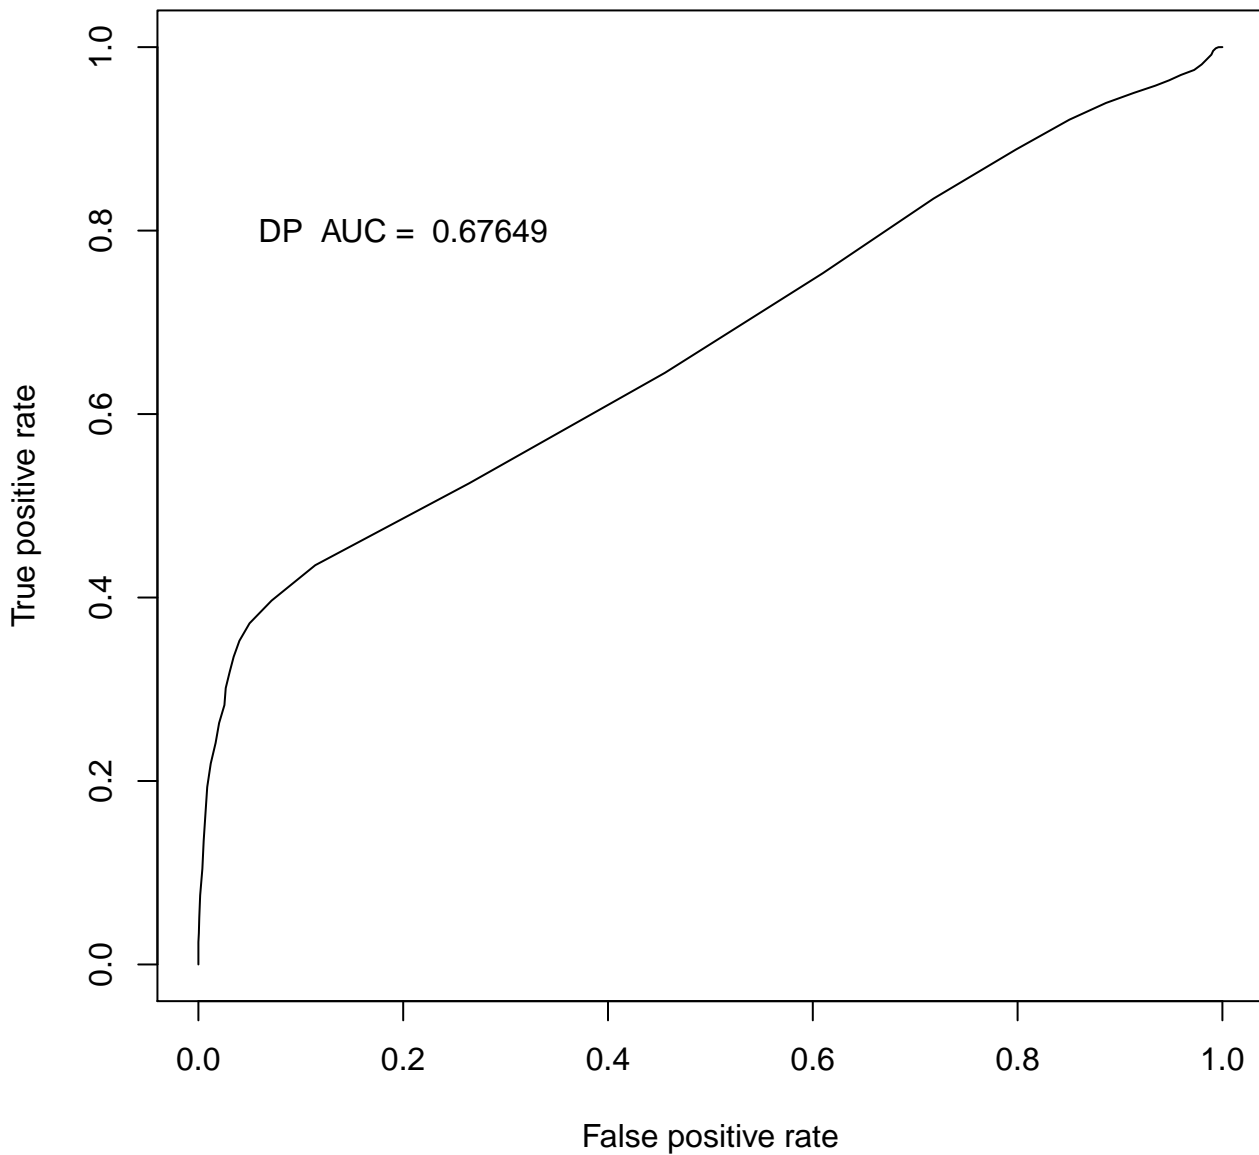

# ROC-plot pp.low.snp.hete MQ

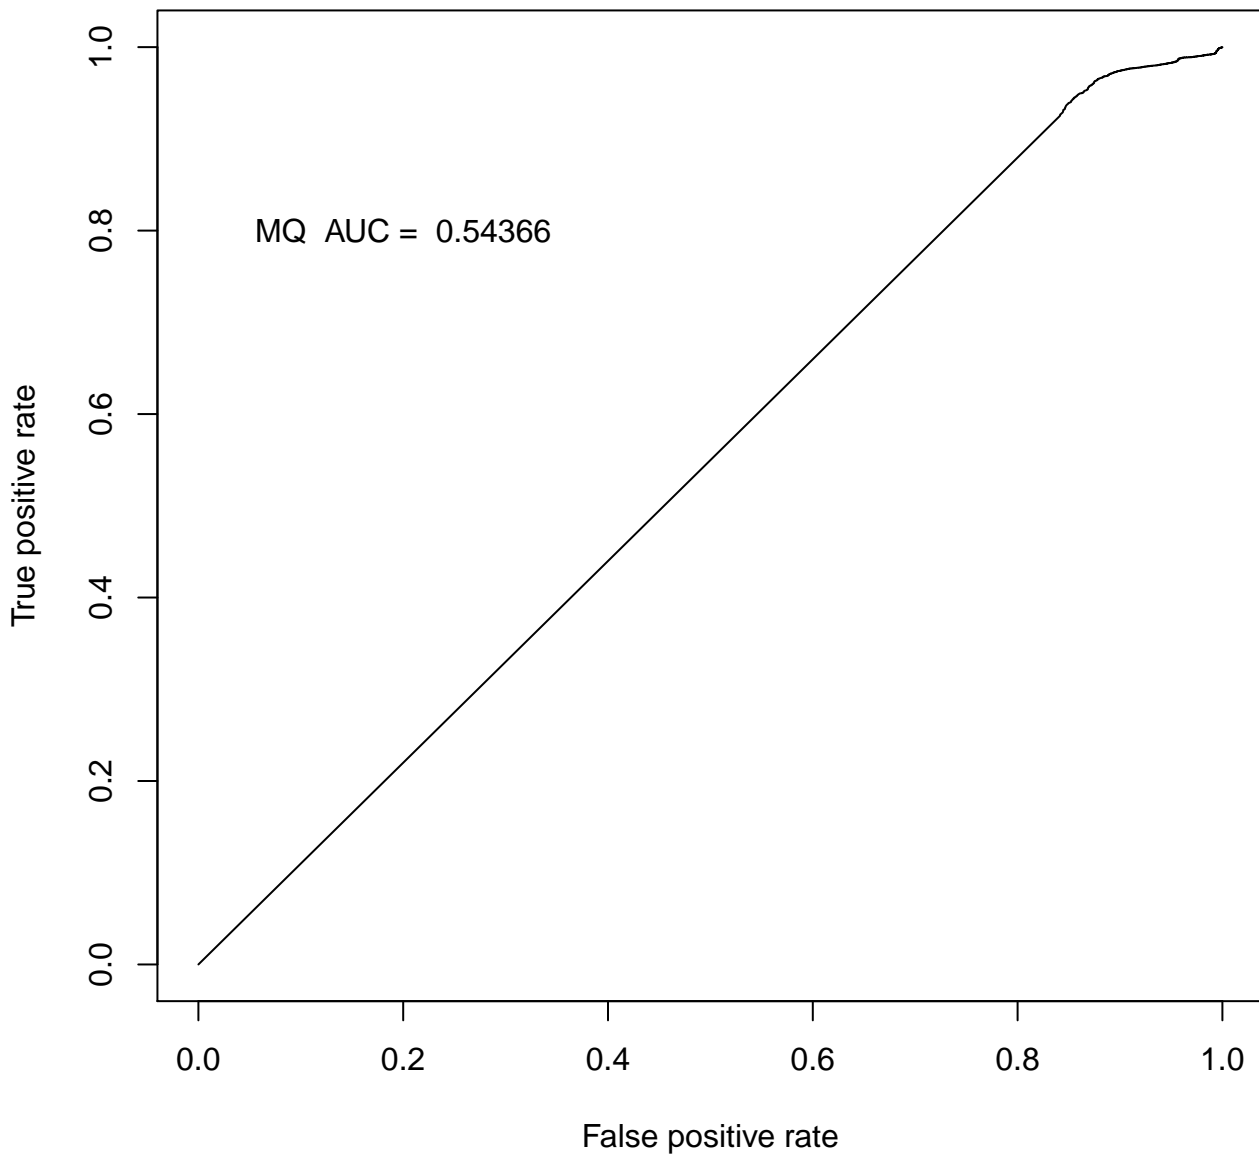



# ROC-plot pp.low.snp.hete MQRankSum

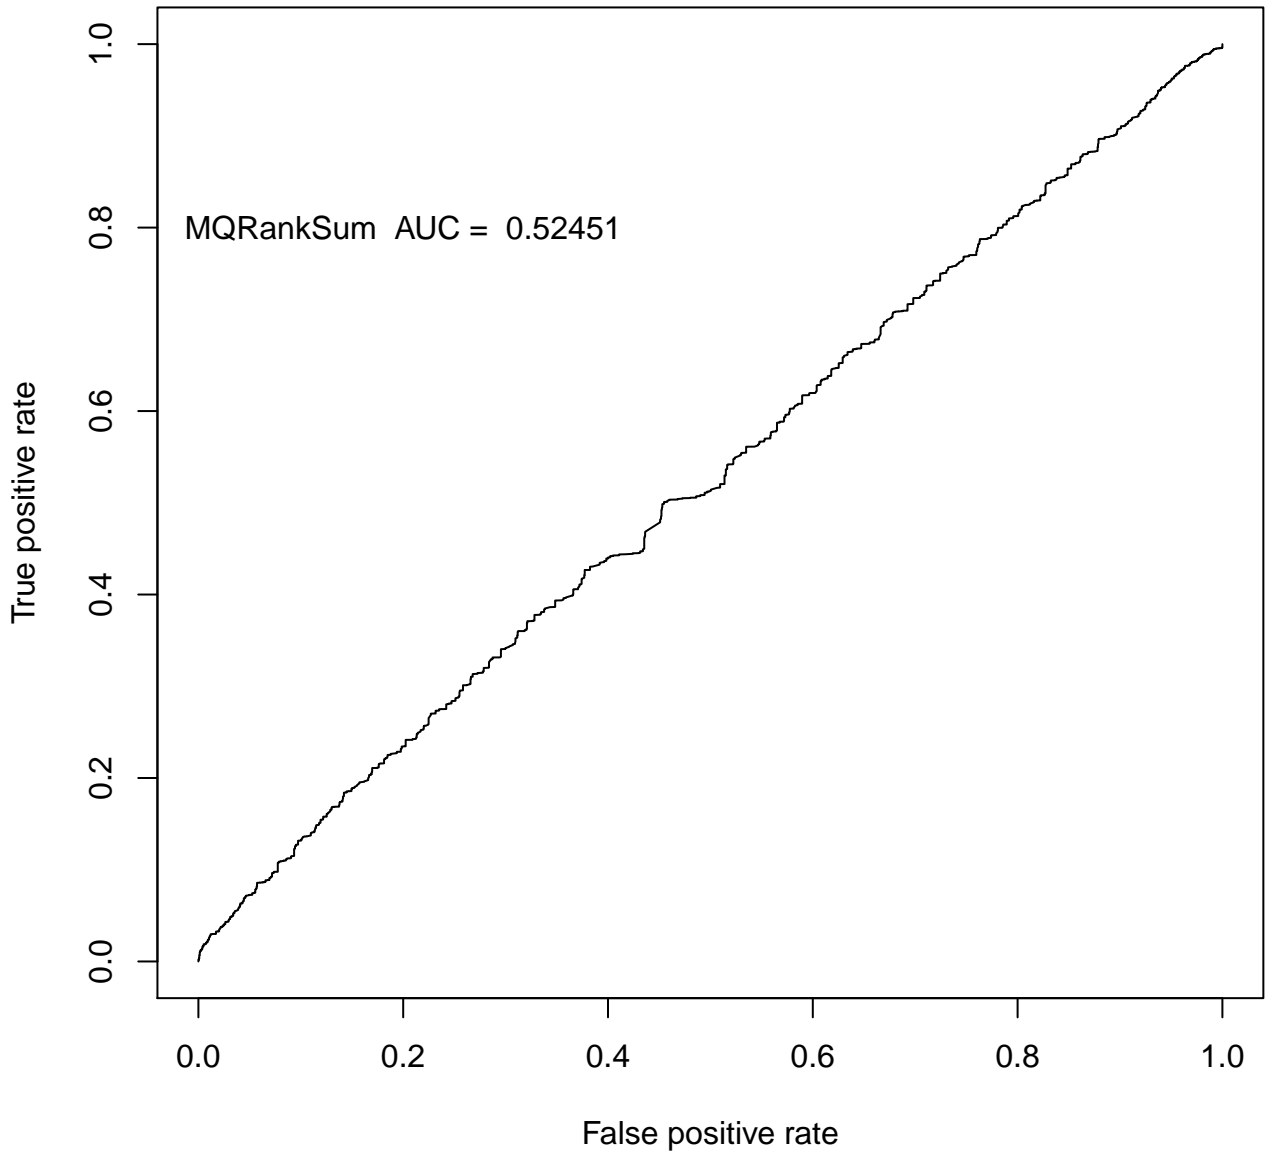

# ROC-plot pp.low.snp.hete ReadPosRankSum

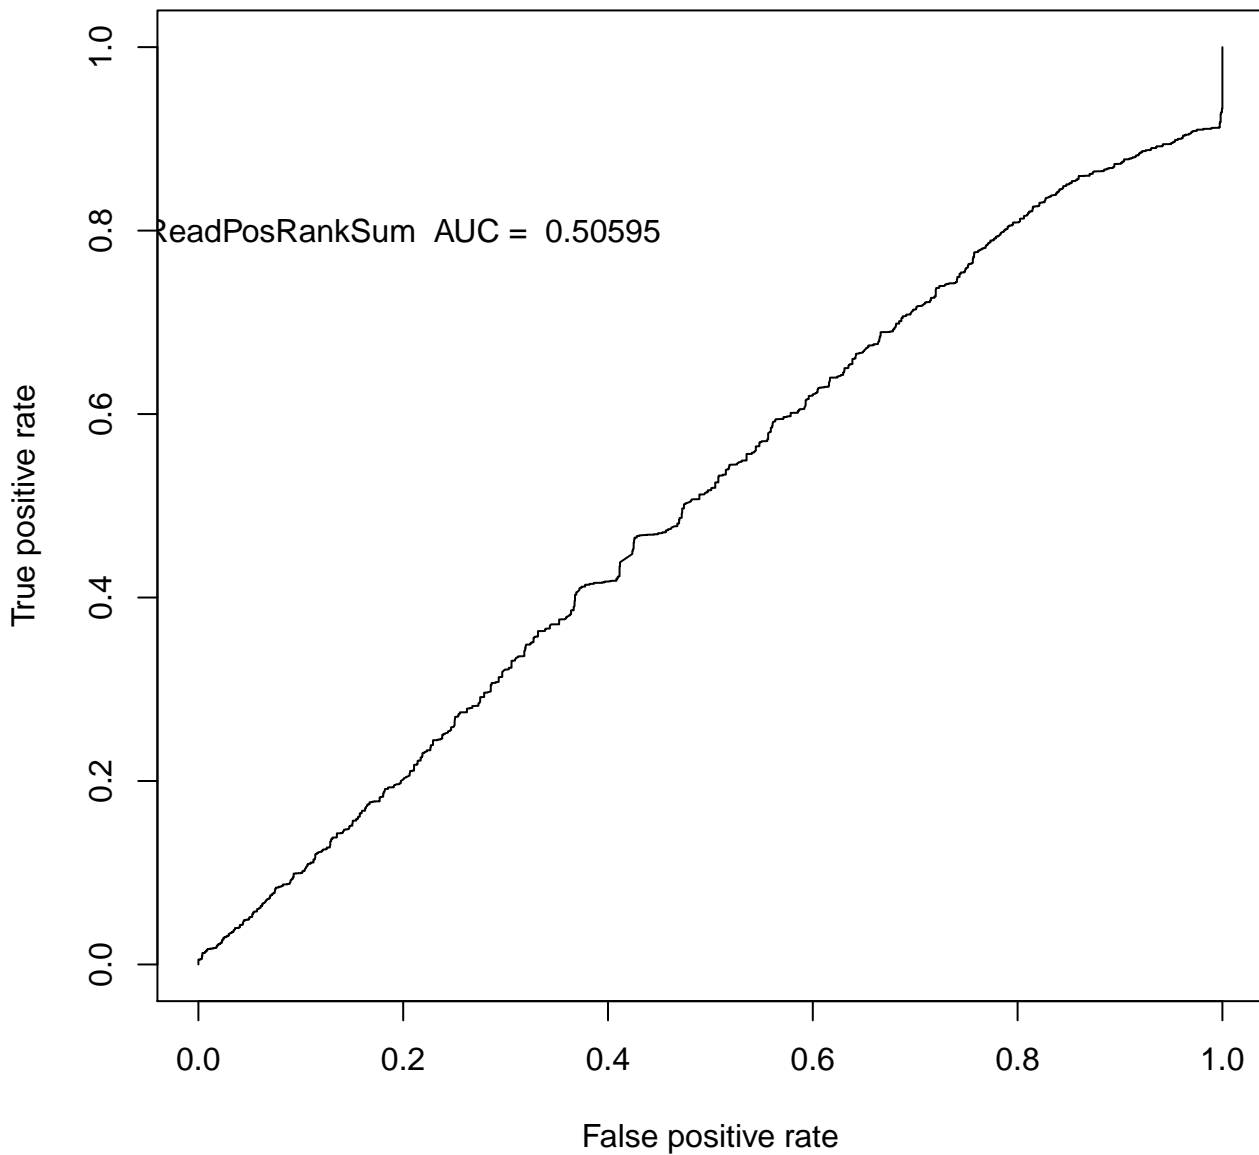

# ROC-plot pp.low.snp.hete GQ

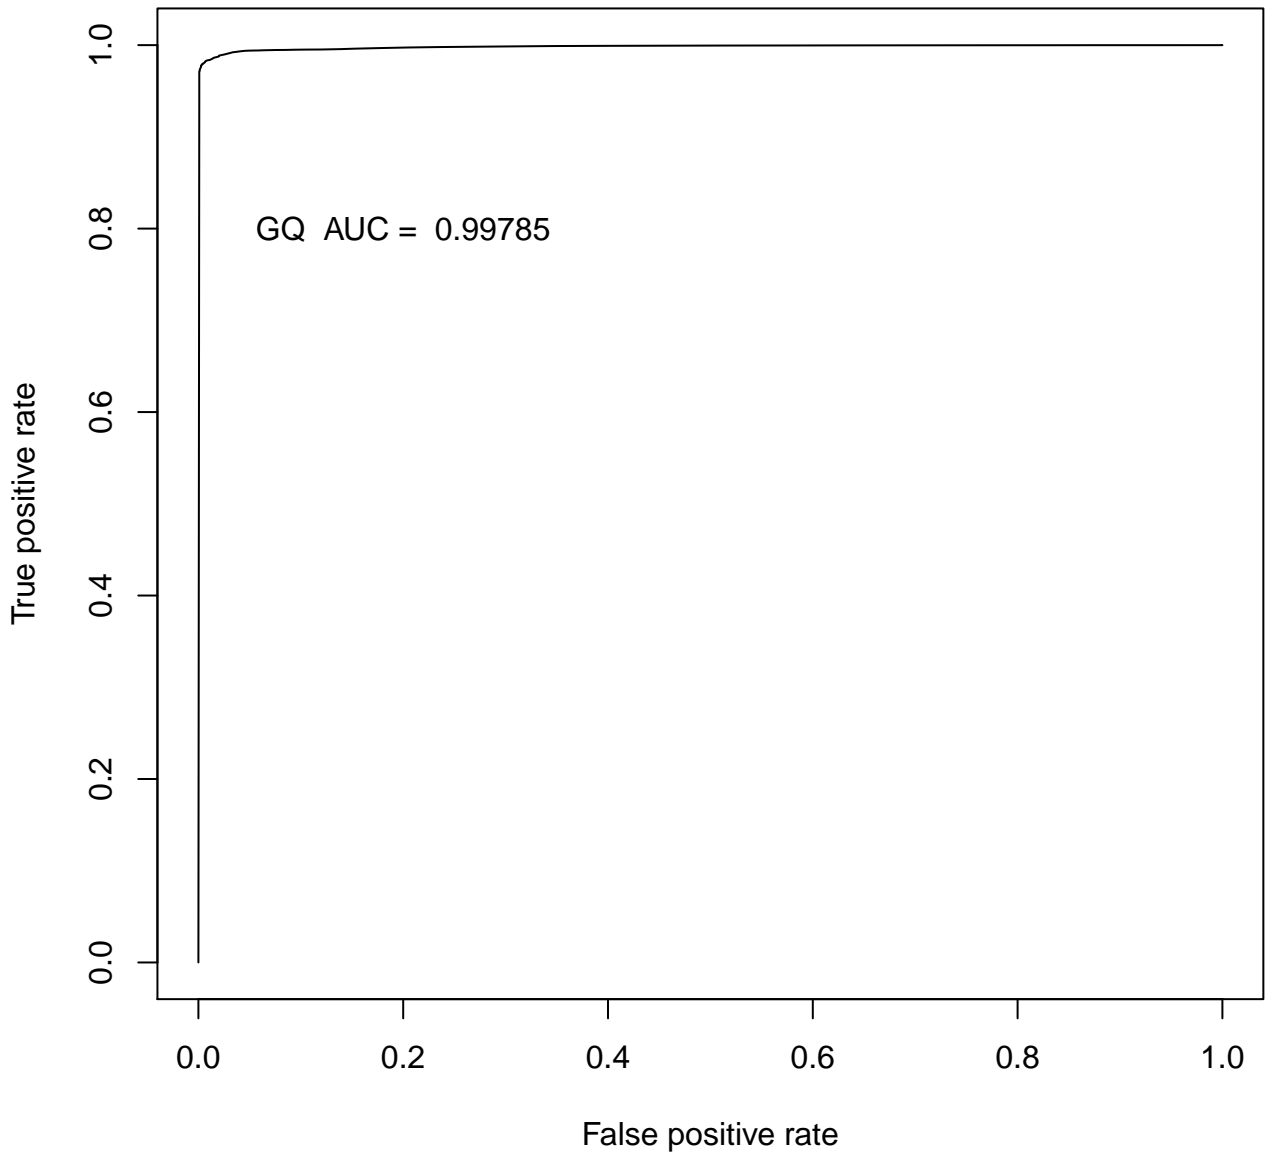

# ROC-plot pp.low.snp.hete ADT

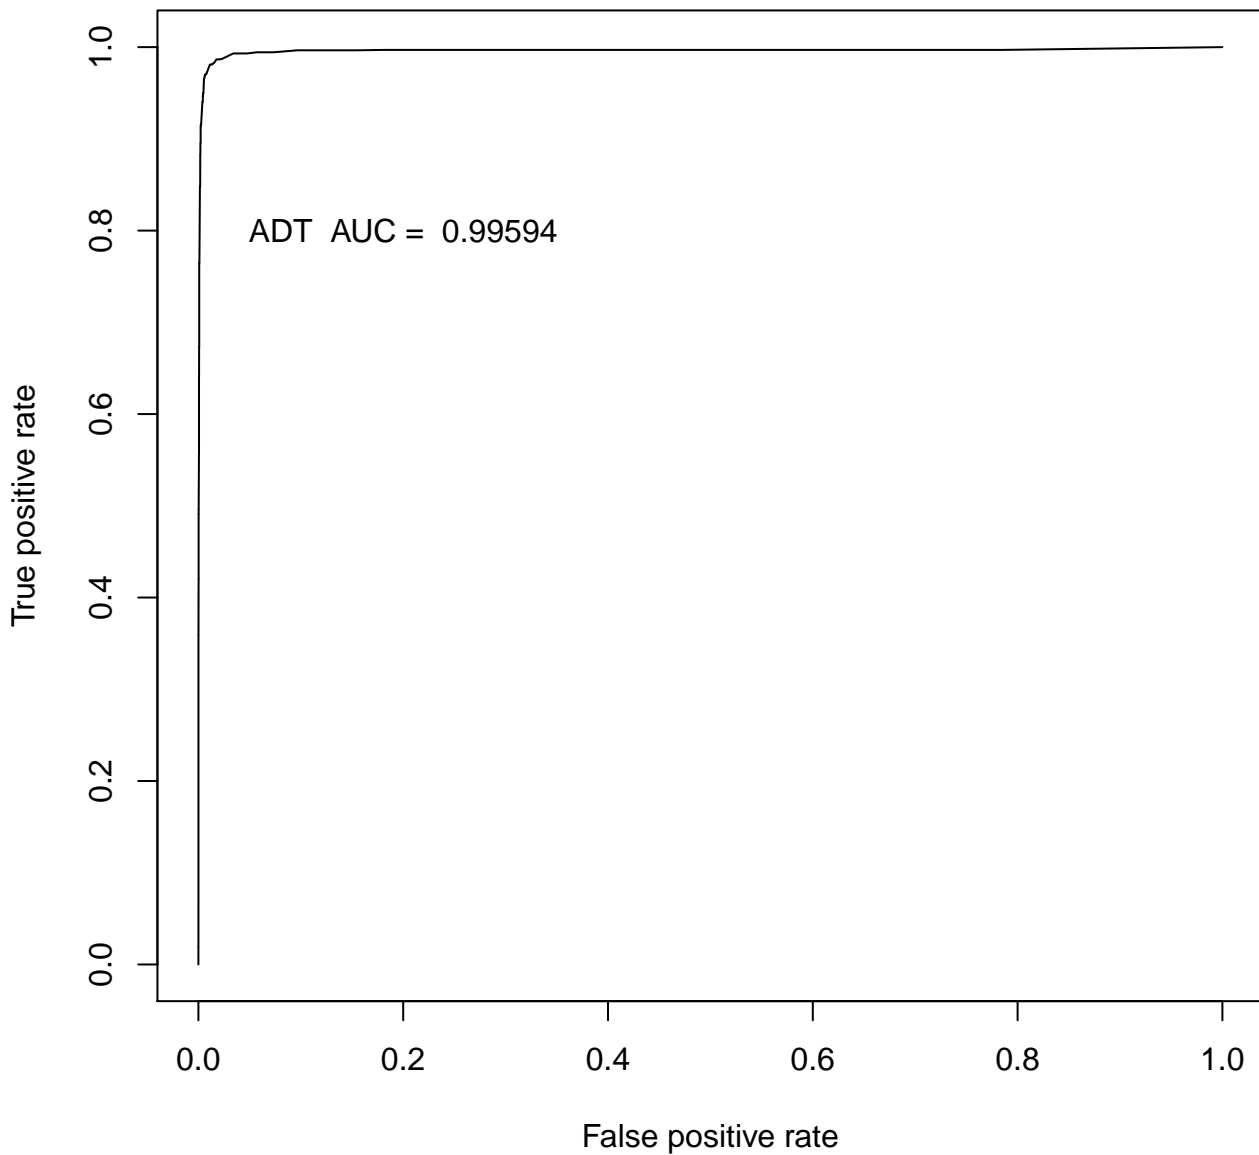

# ROC-plot pp.low.snp.hete ADTL

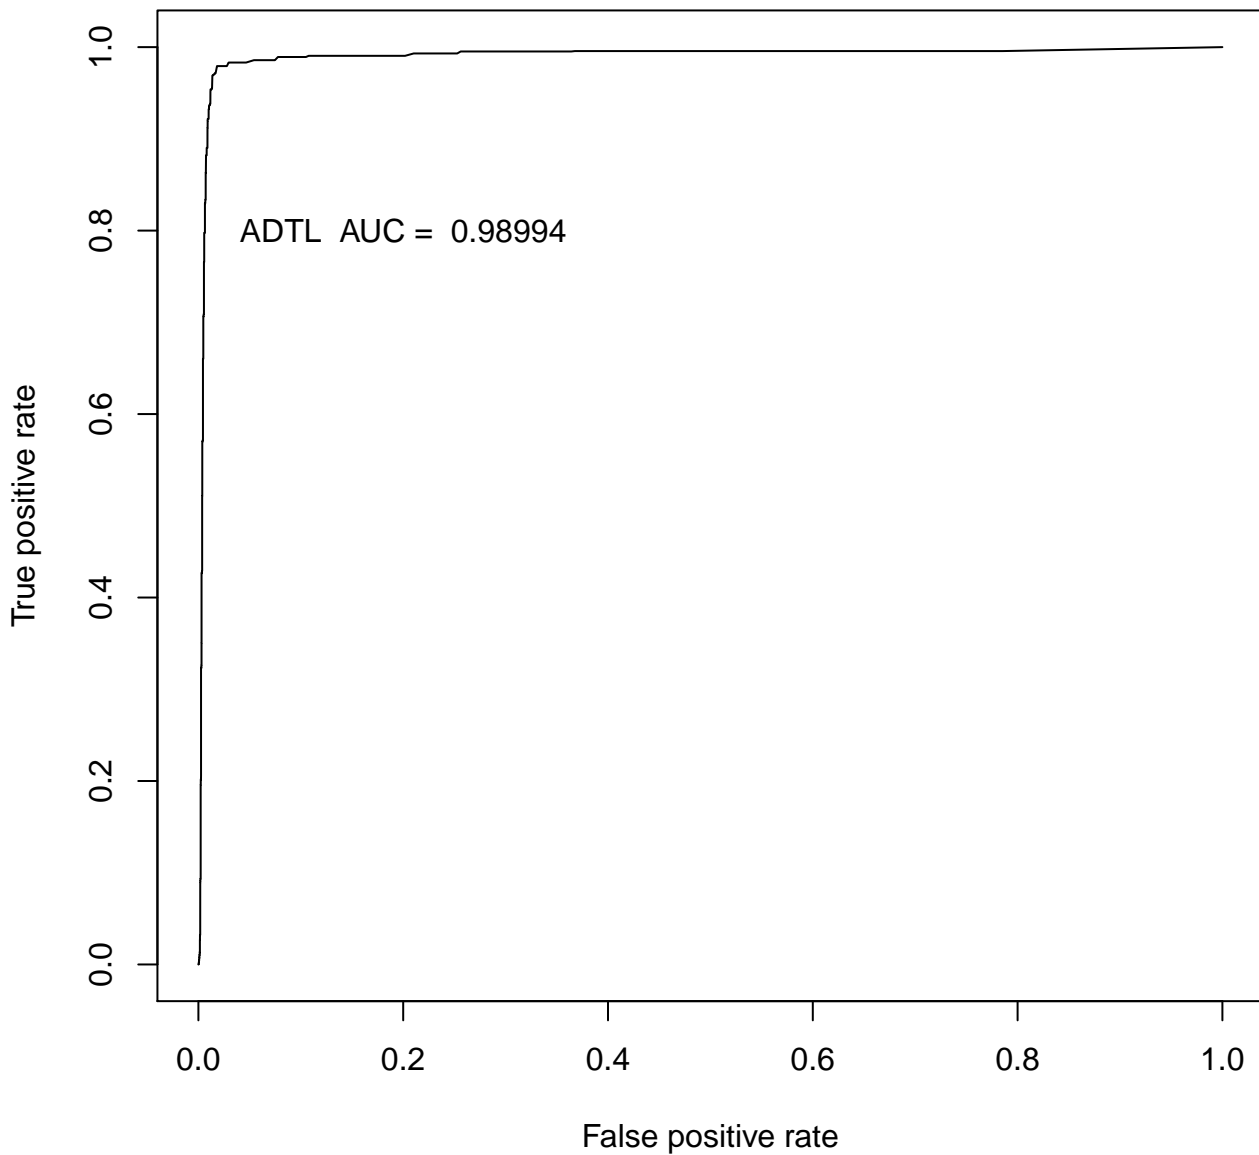

# ROC-plot pp.low.snp.hete FS

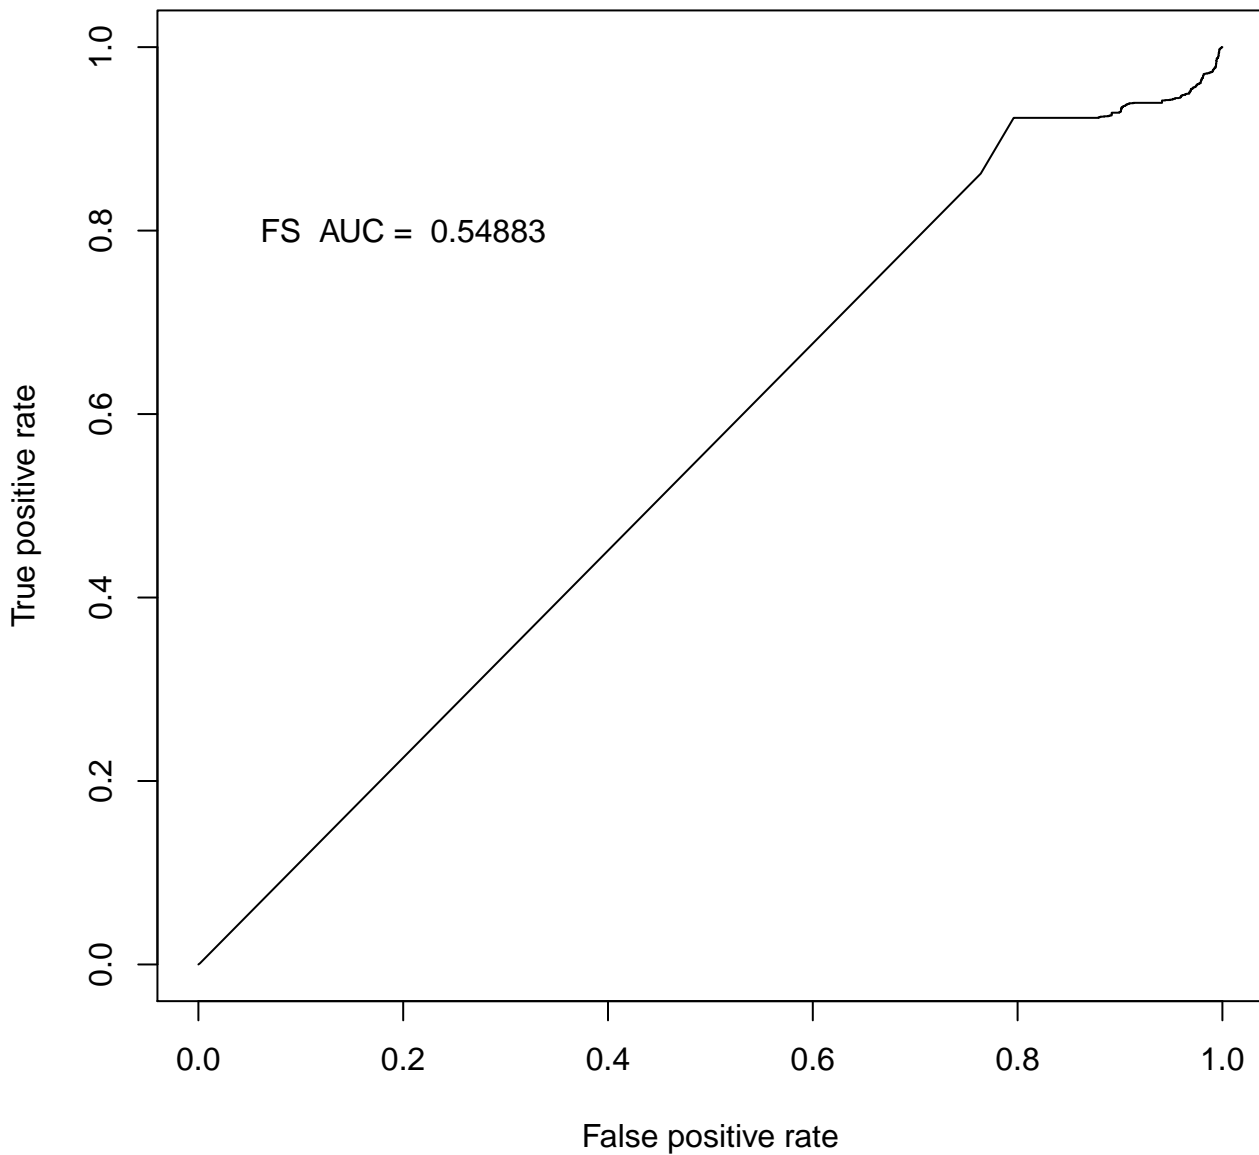

# ROC-plot pp.low.snp.homo BaseQRankSum

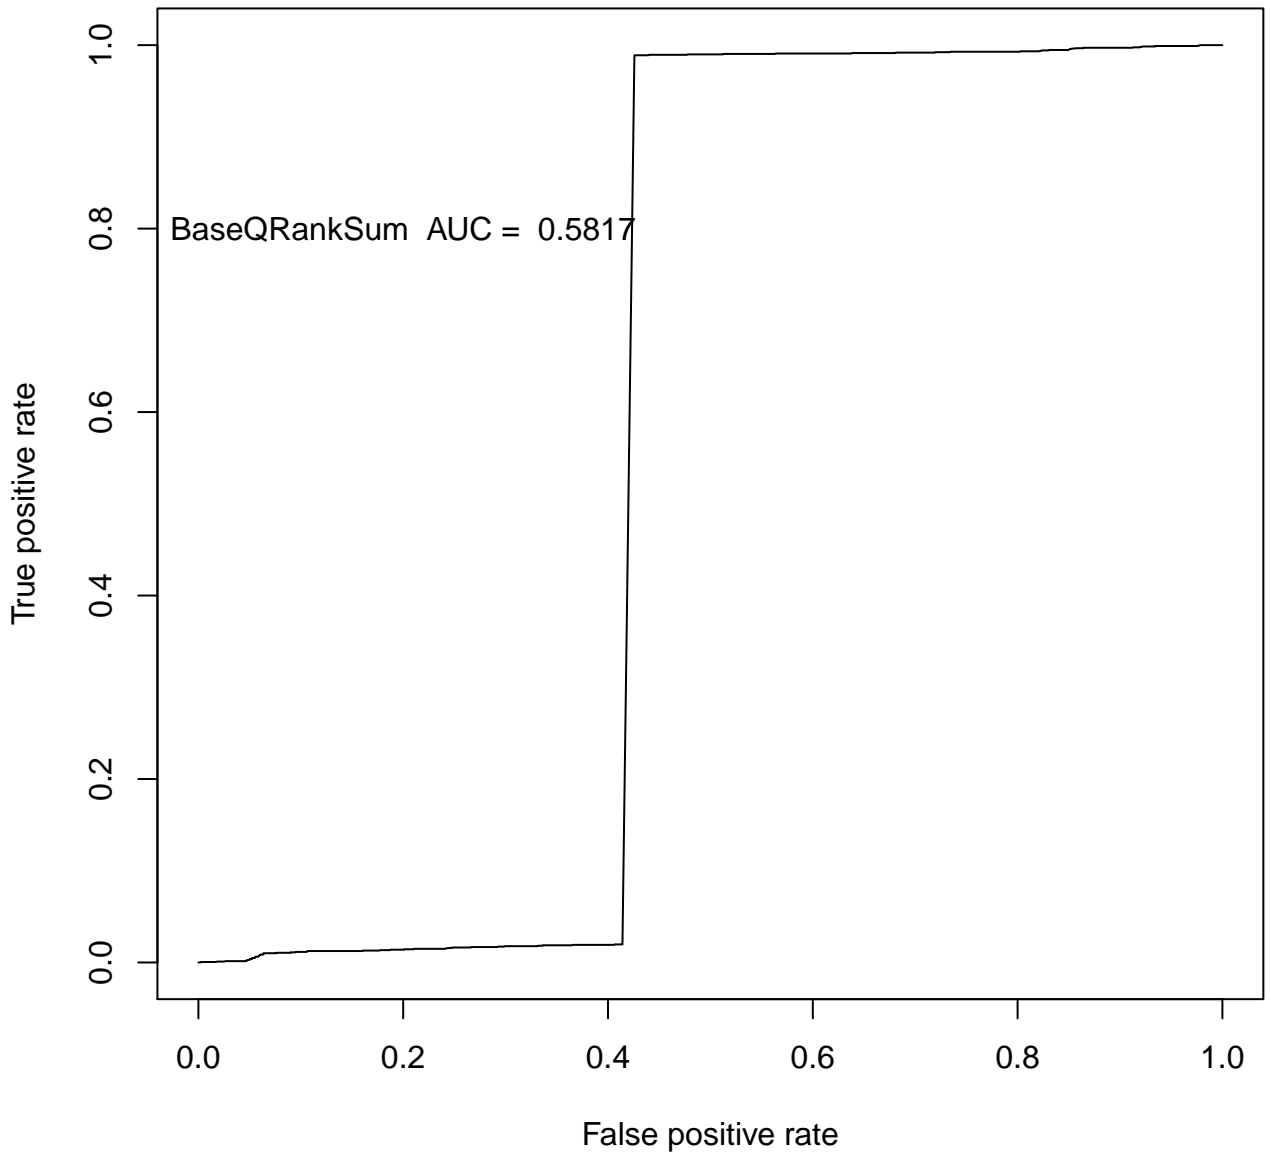

# ROC-plot pp.low.snp.homo ClippingRankSum

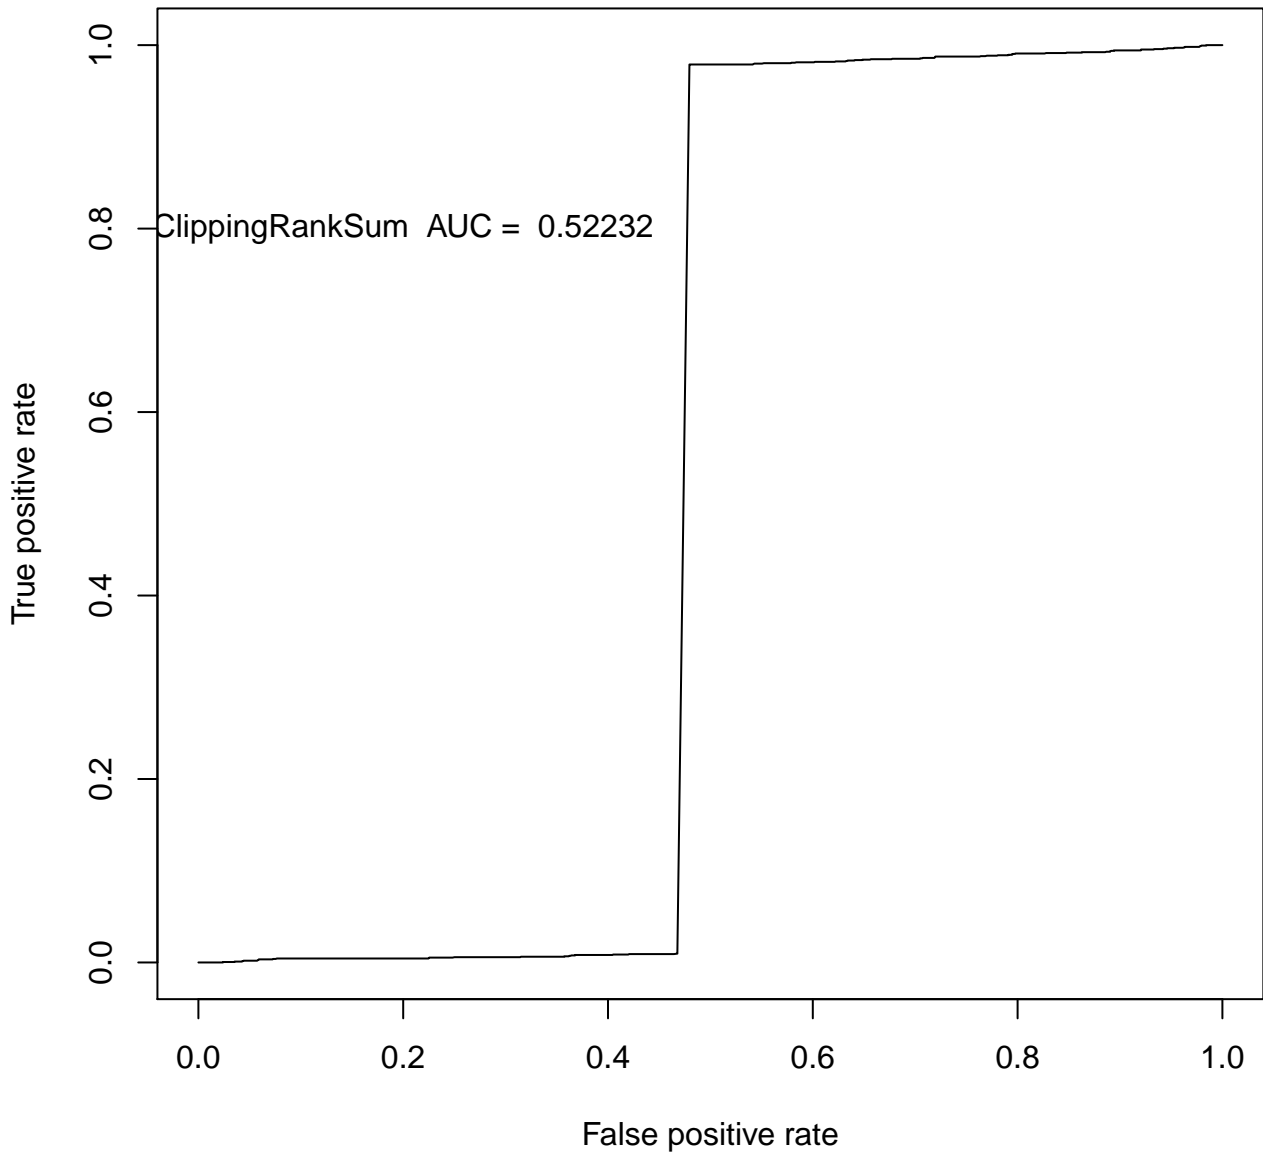



# ROC-plot pp.low.snp.homo DP

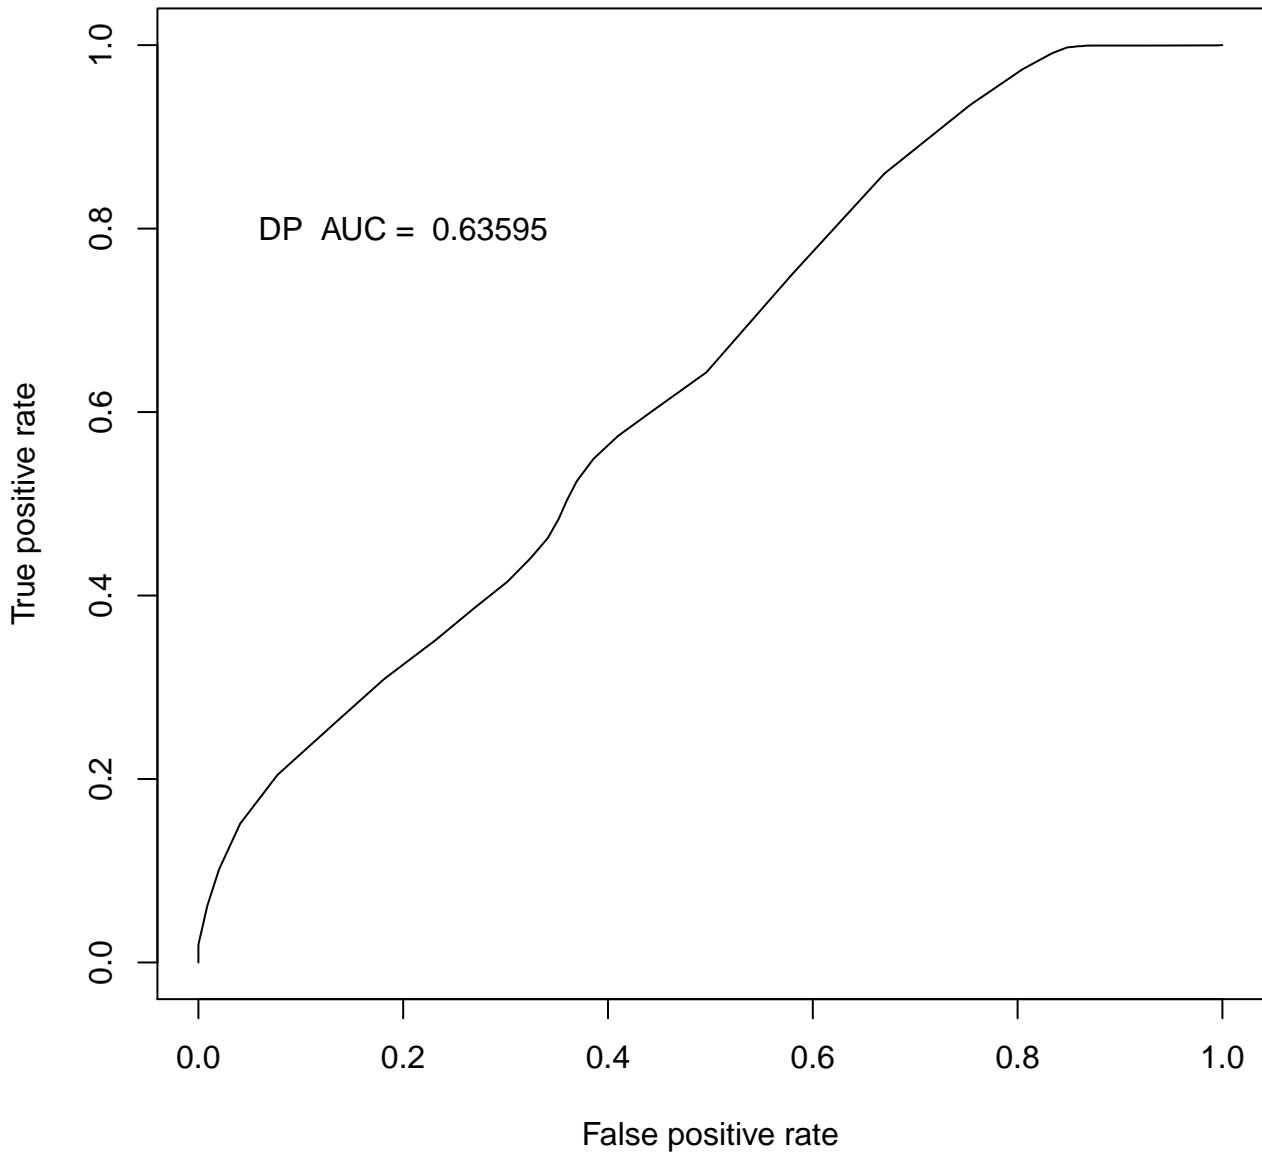

ROC-plot pp.low.snp.homo MQ

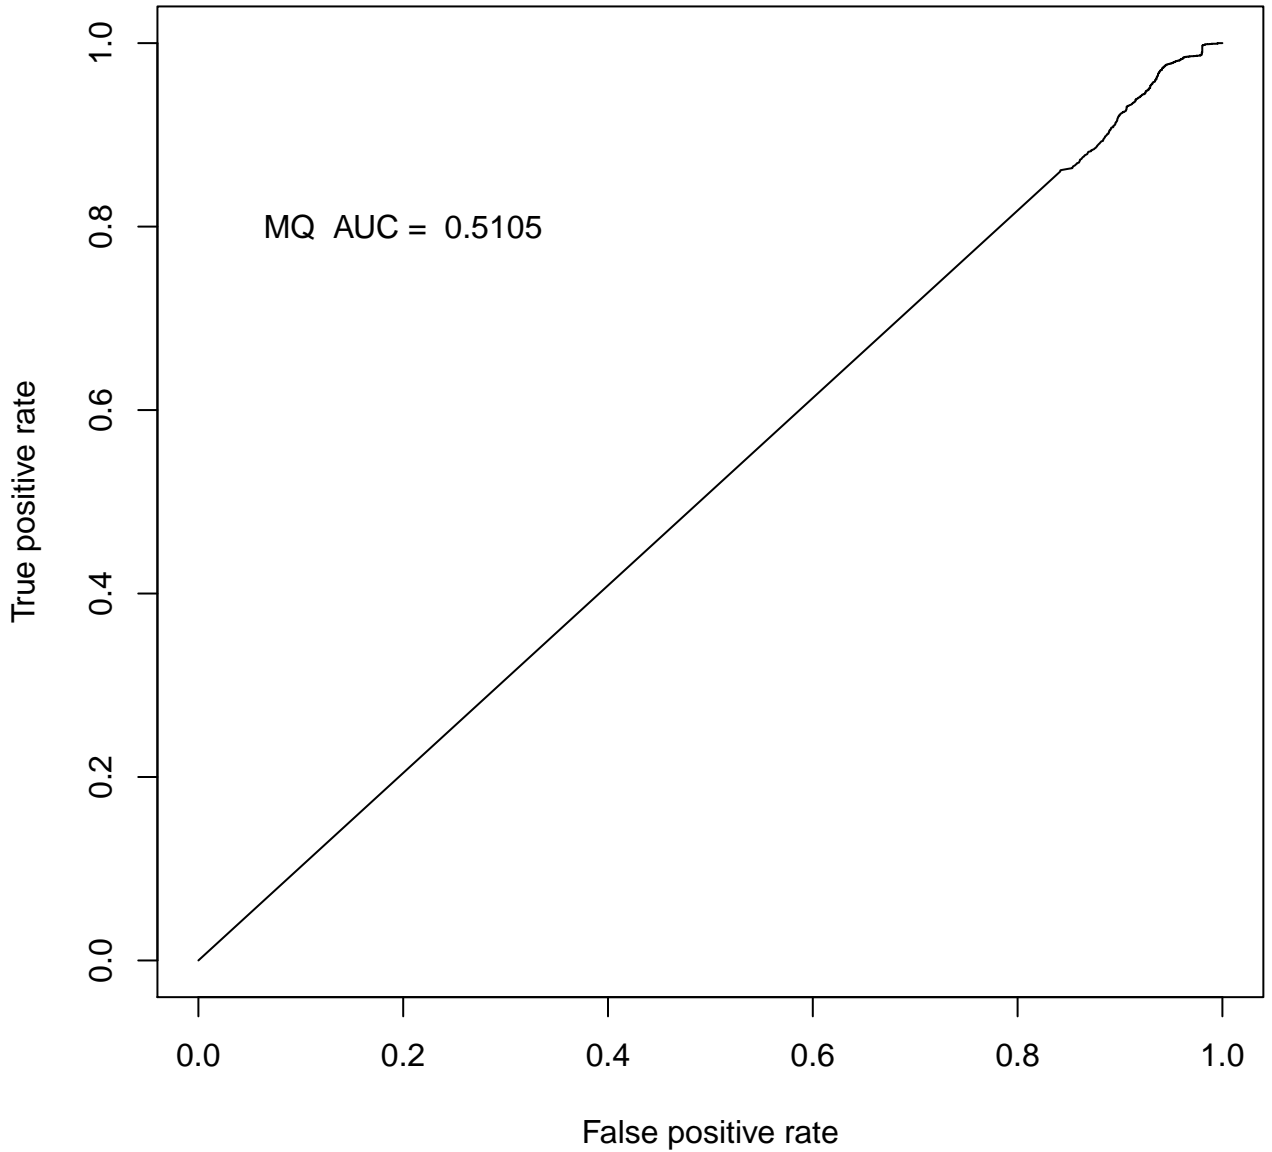

# ROC-plot pp.low.snp.homo MQRankSum

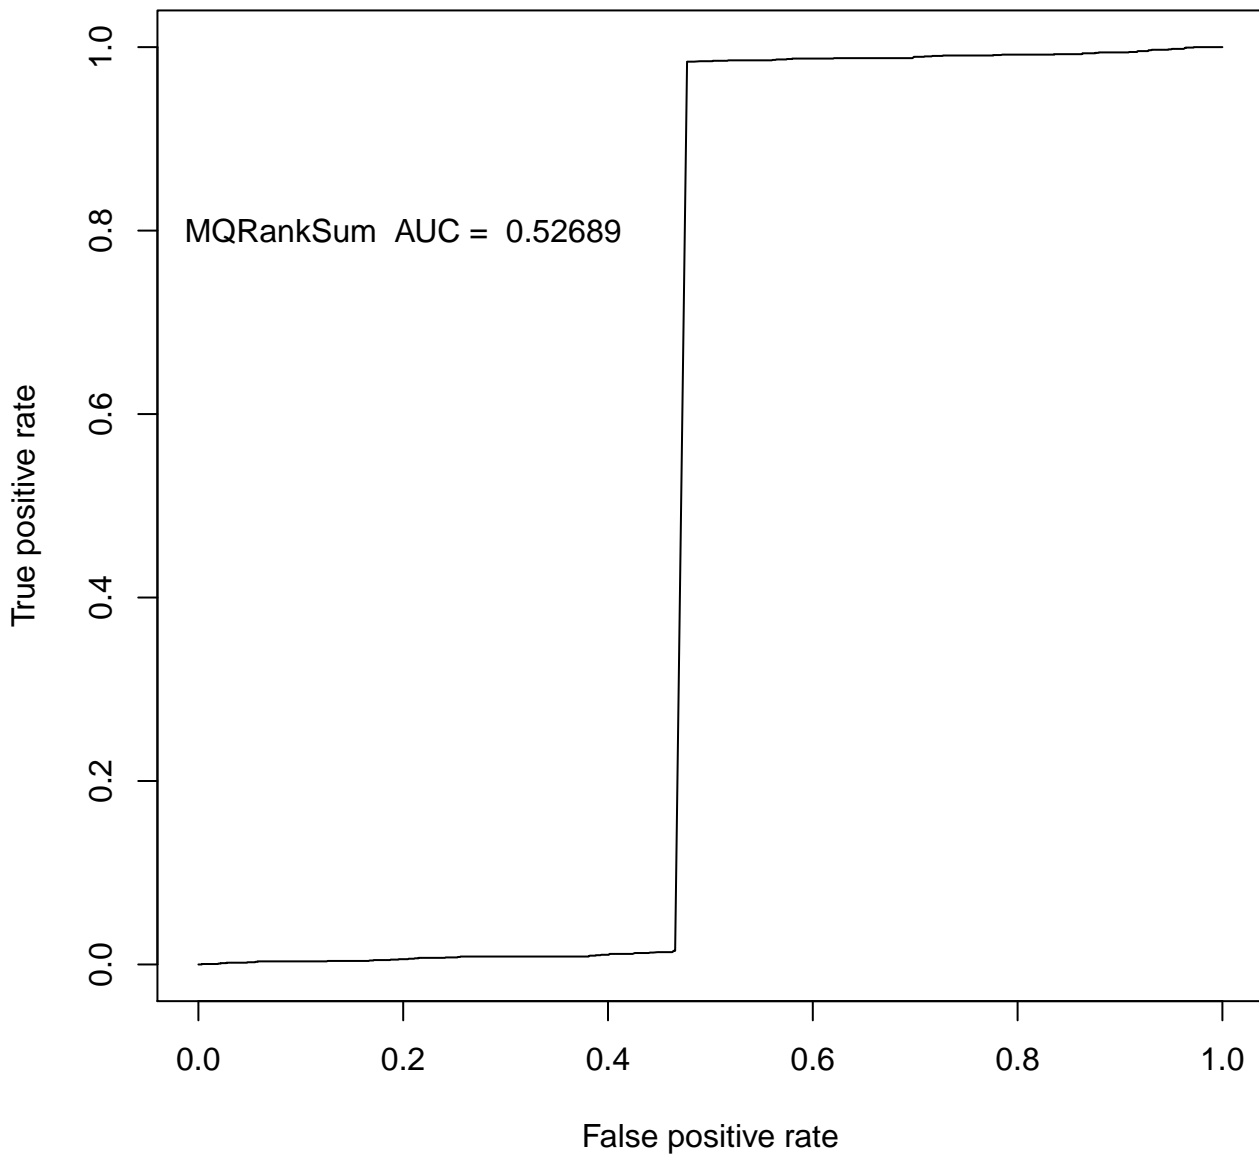

# ROC-plot pp.low.snp.homo ReadPosRankSum

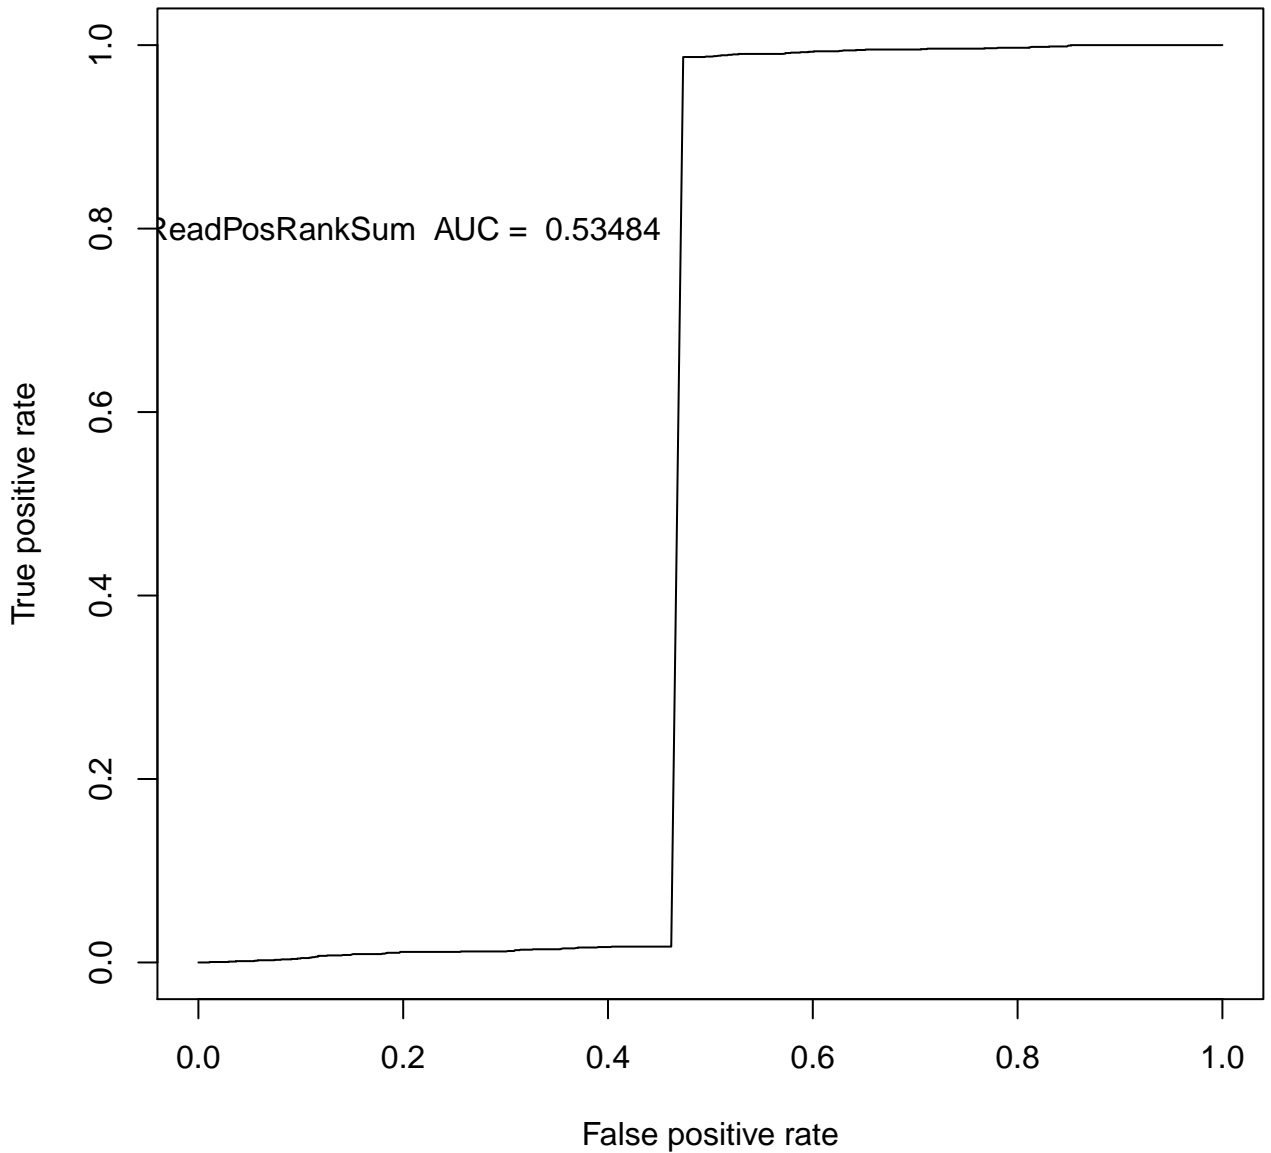

# ROC-plot pp.low.snp.homo GQ

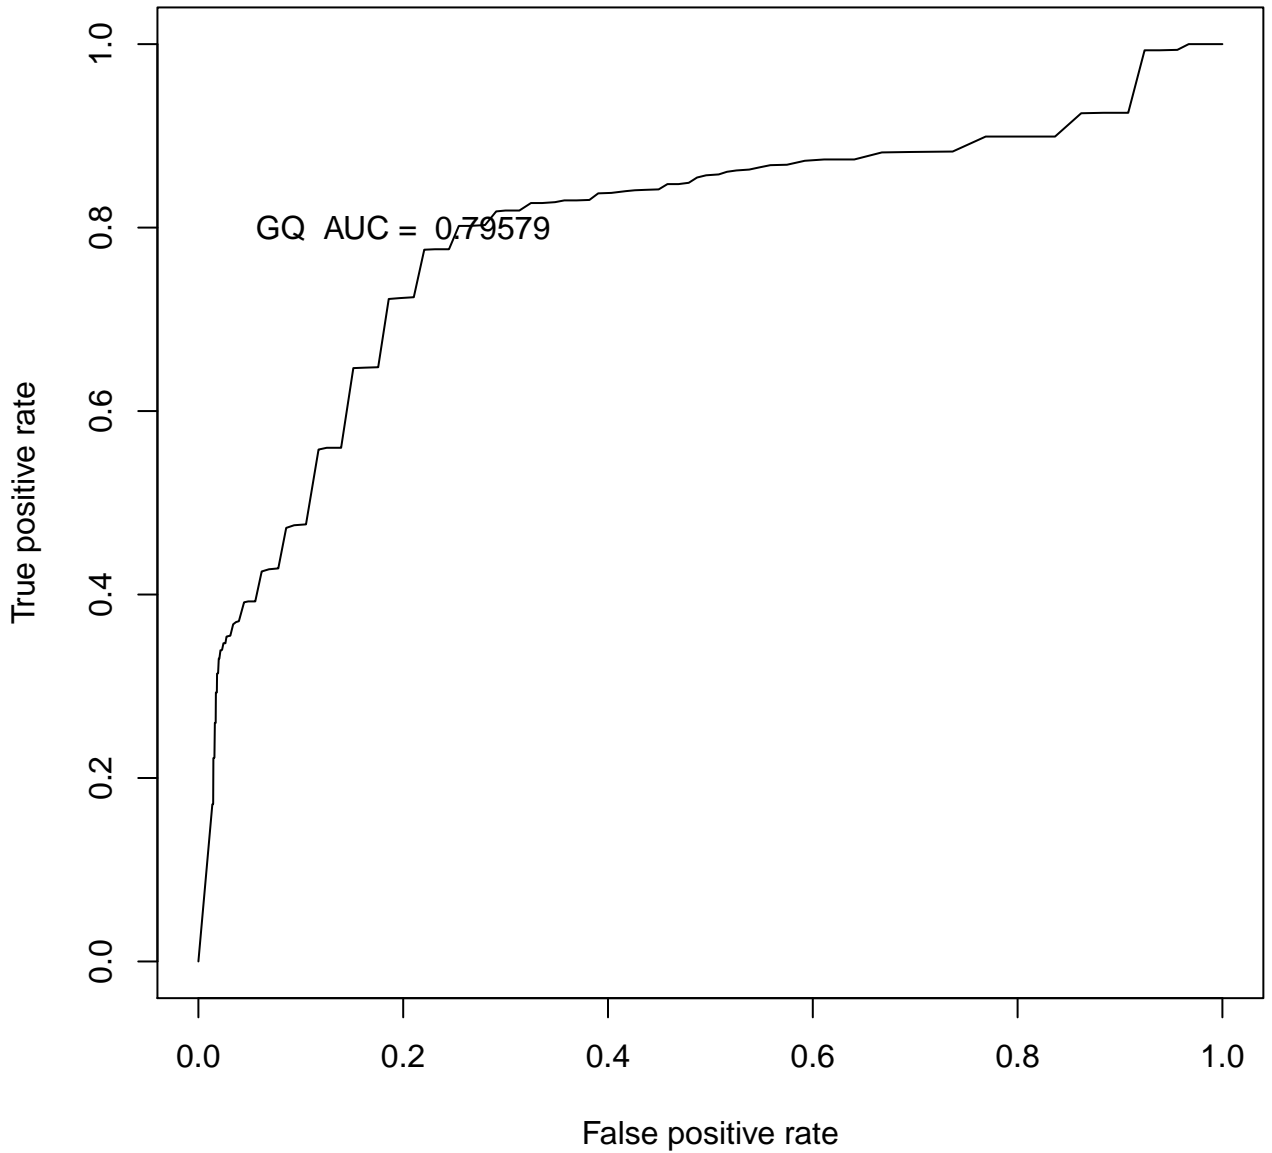

# ROC-plot pp.low.snp.homo ADT

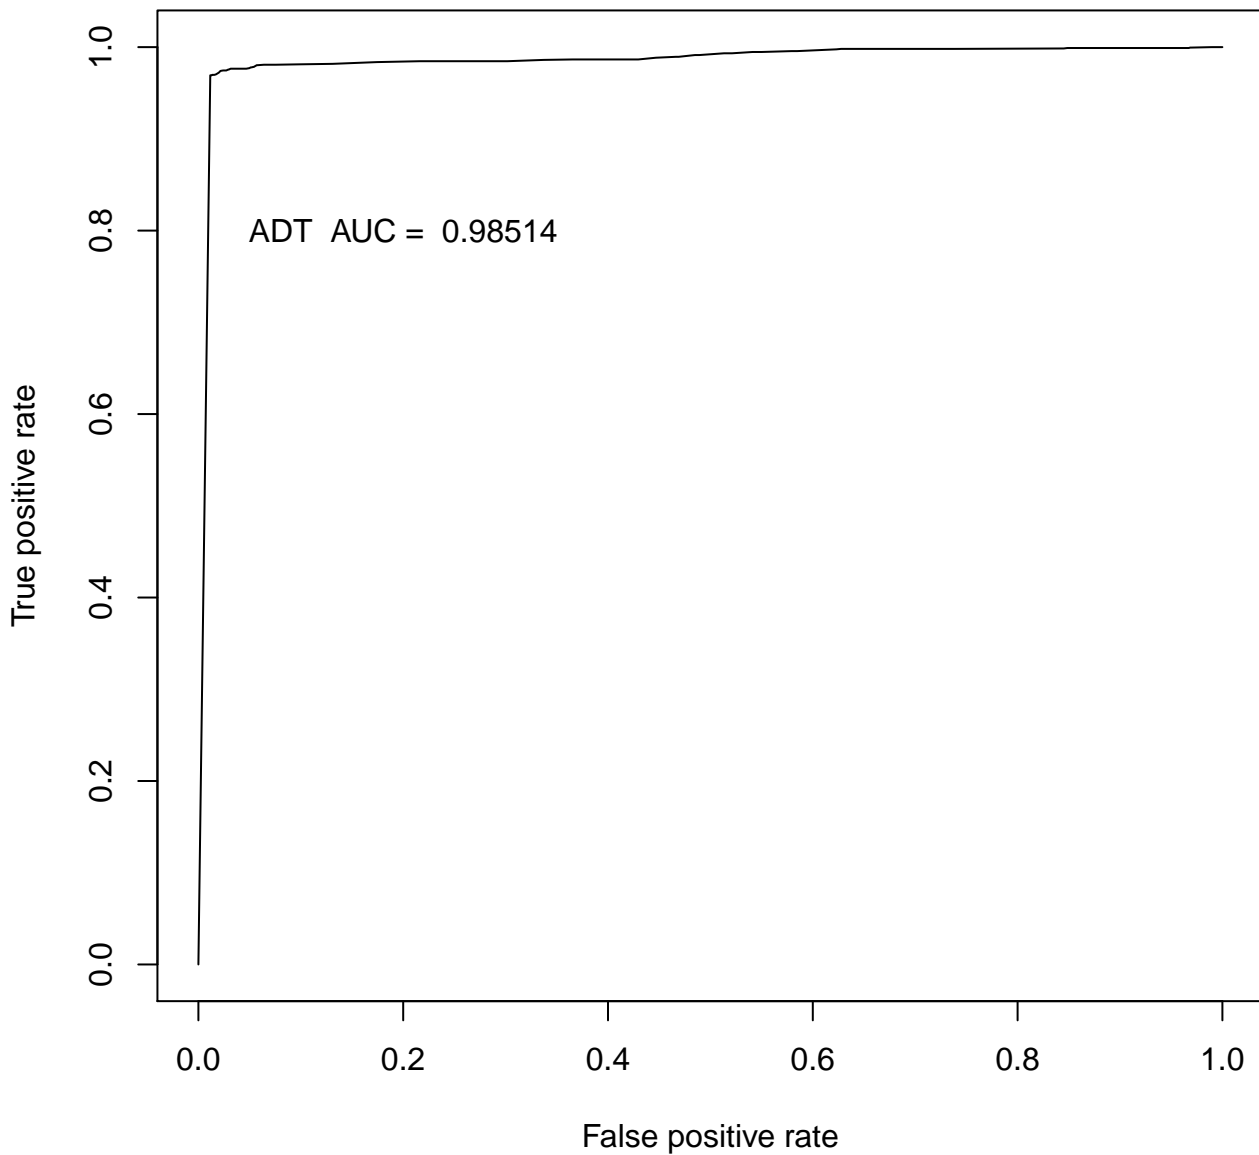

# ROC-plot pp.low.snp.homo ADTL

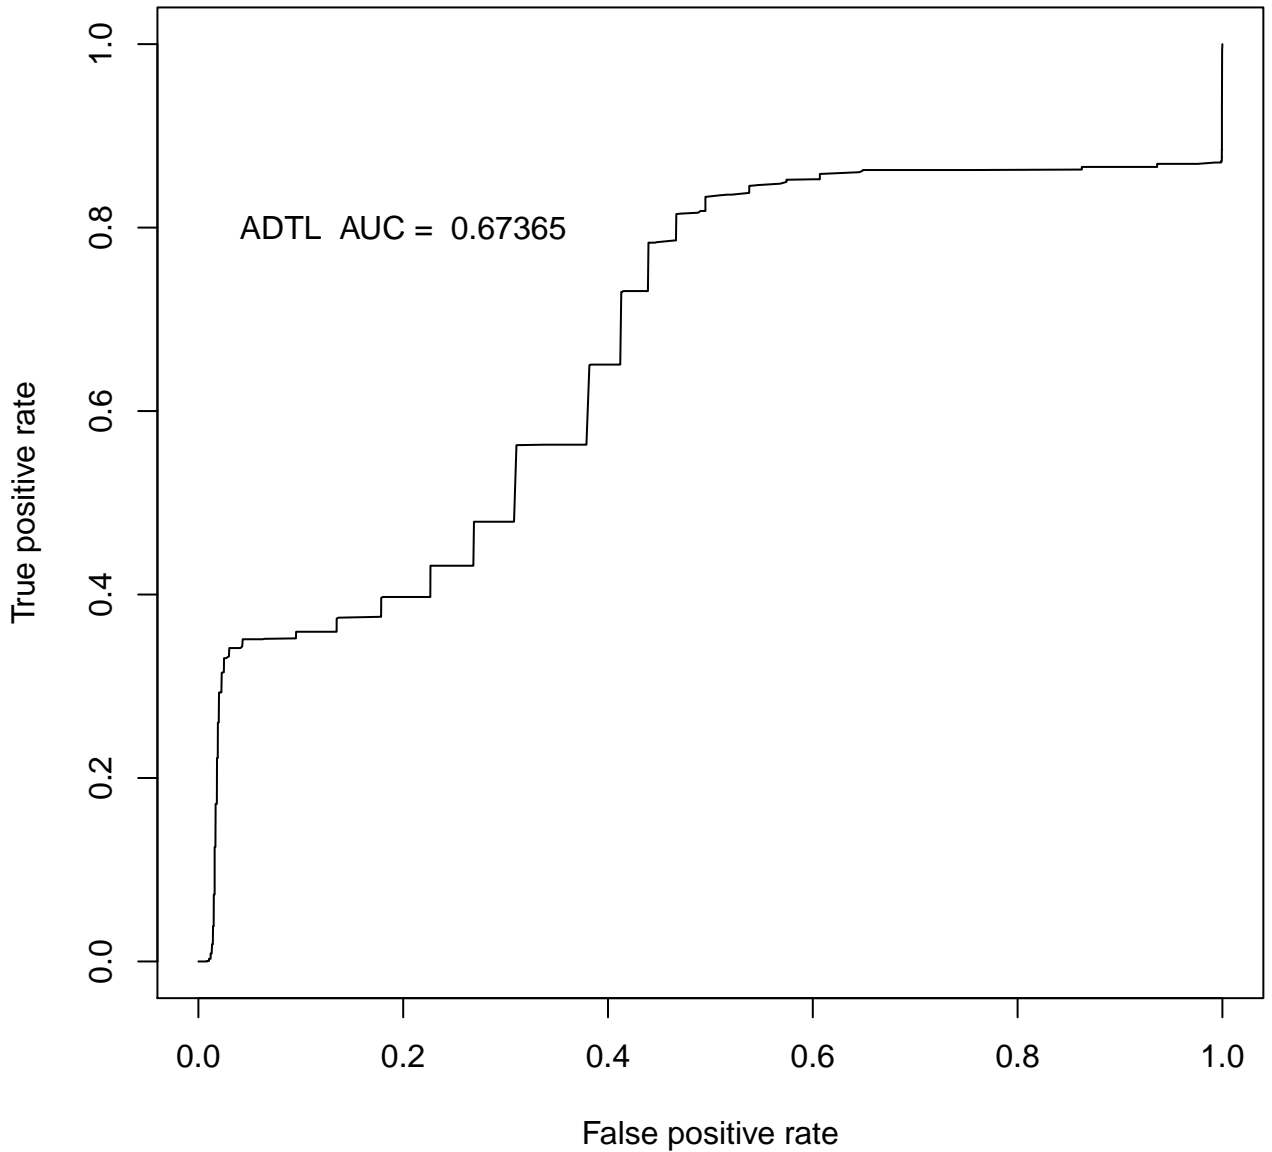

# ROC-plot pp.low.snp.homo FS

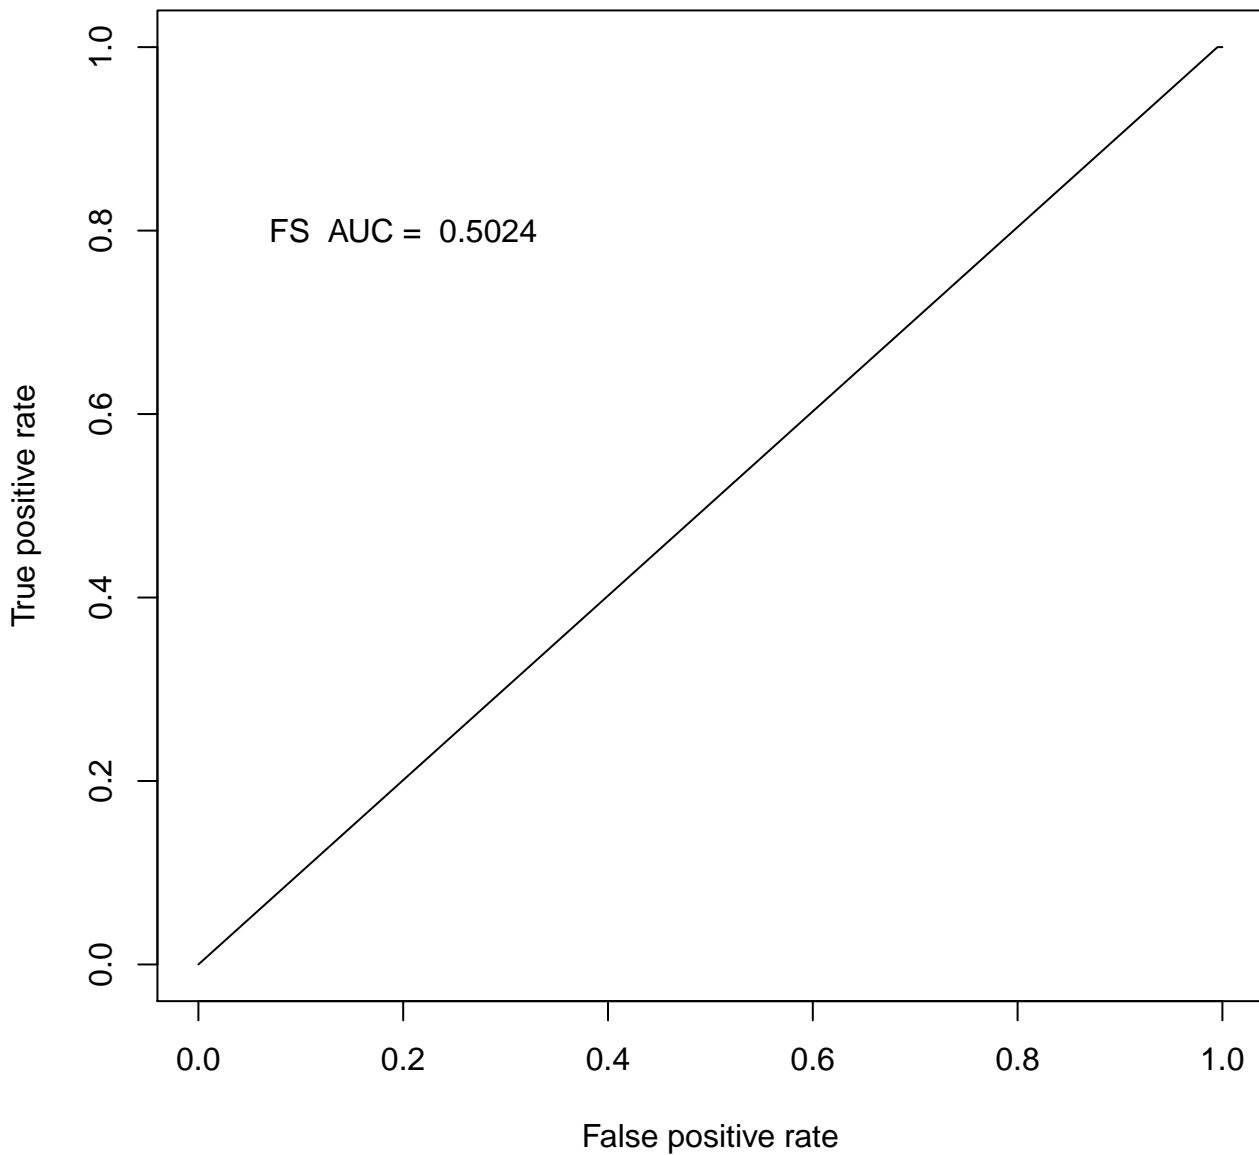



# ROC-plot pp.nsnp.hete BaseQRankSum

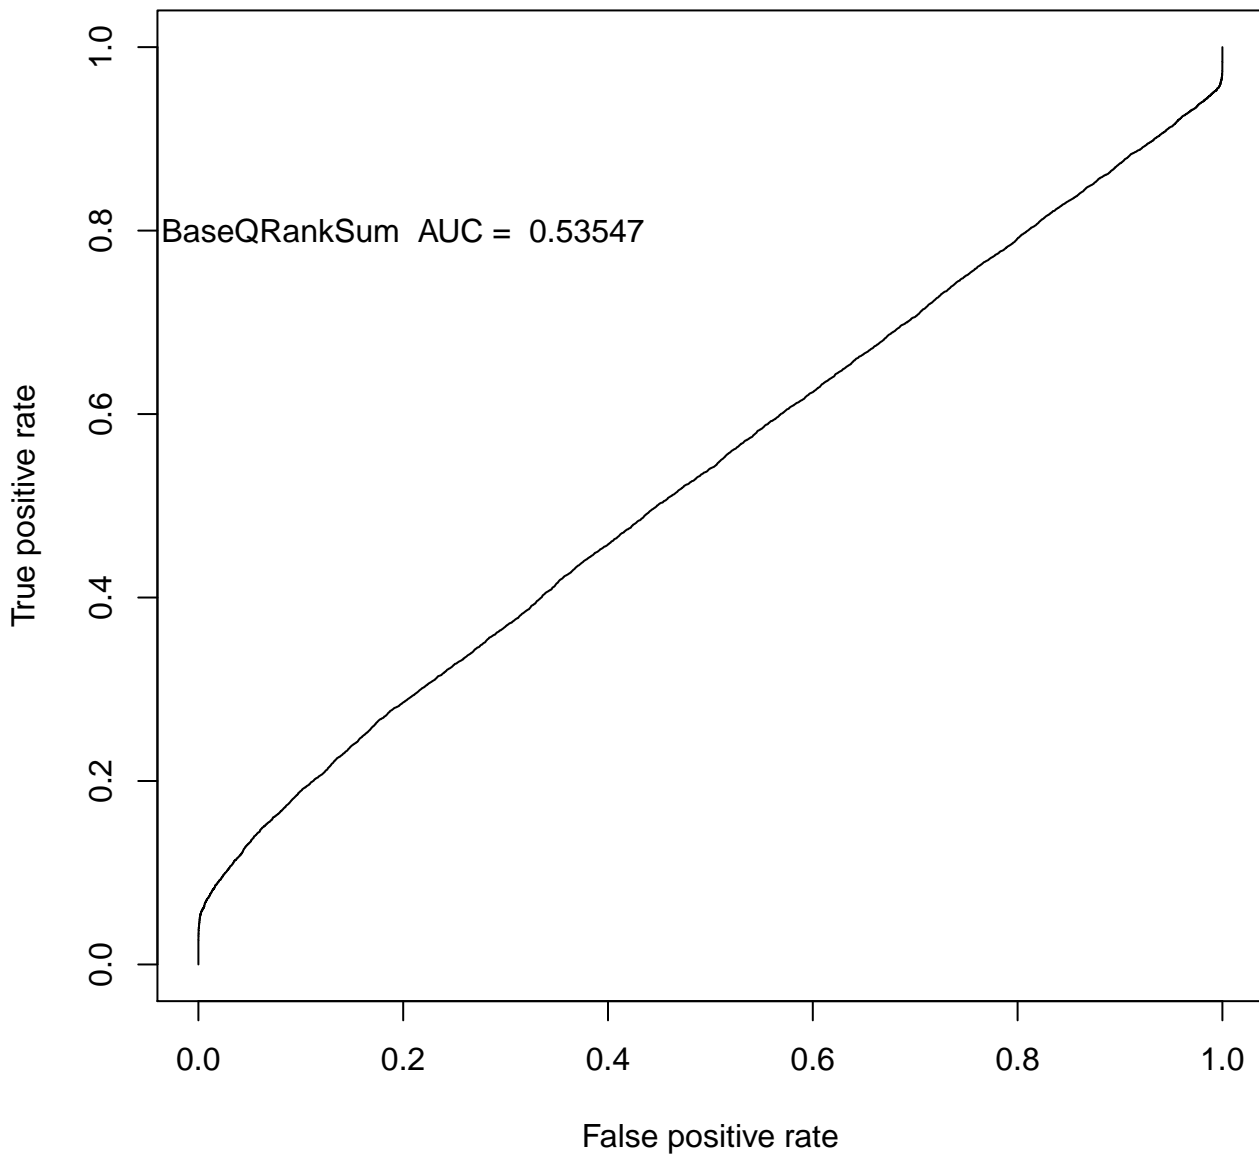

# ROC-plot pp.nsnp.hete ClippingRankSum

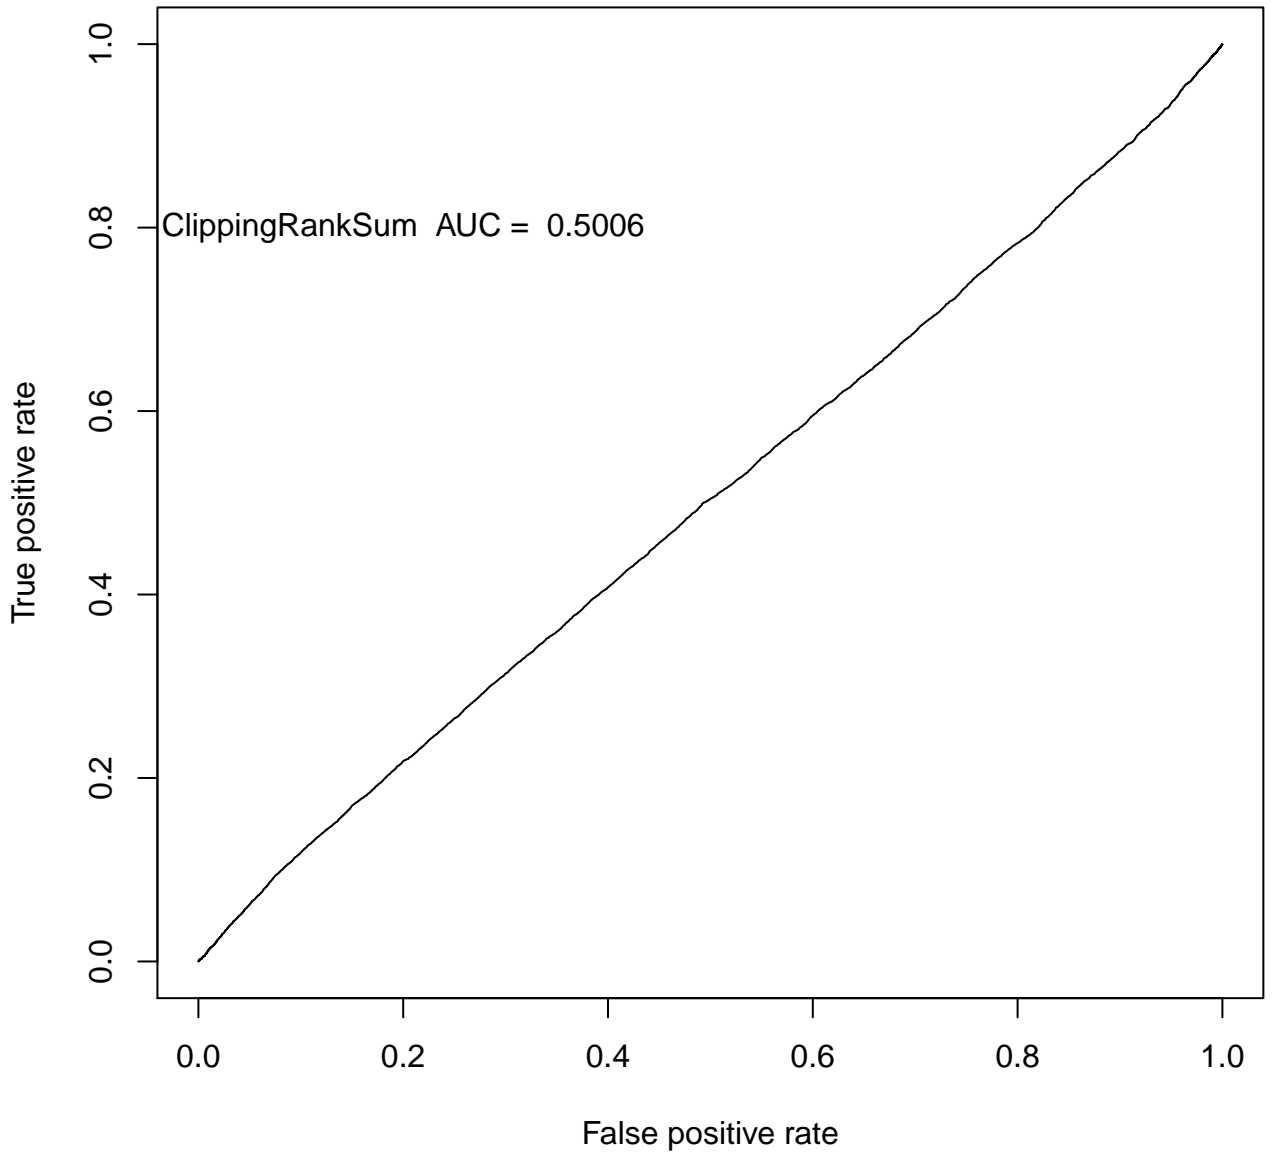

# ROC-plot pp.nsnp.hete DP

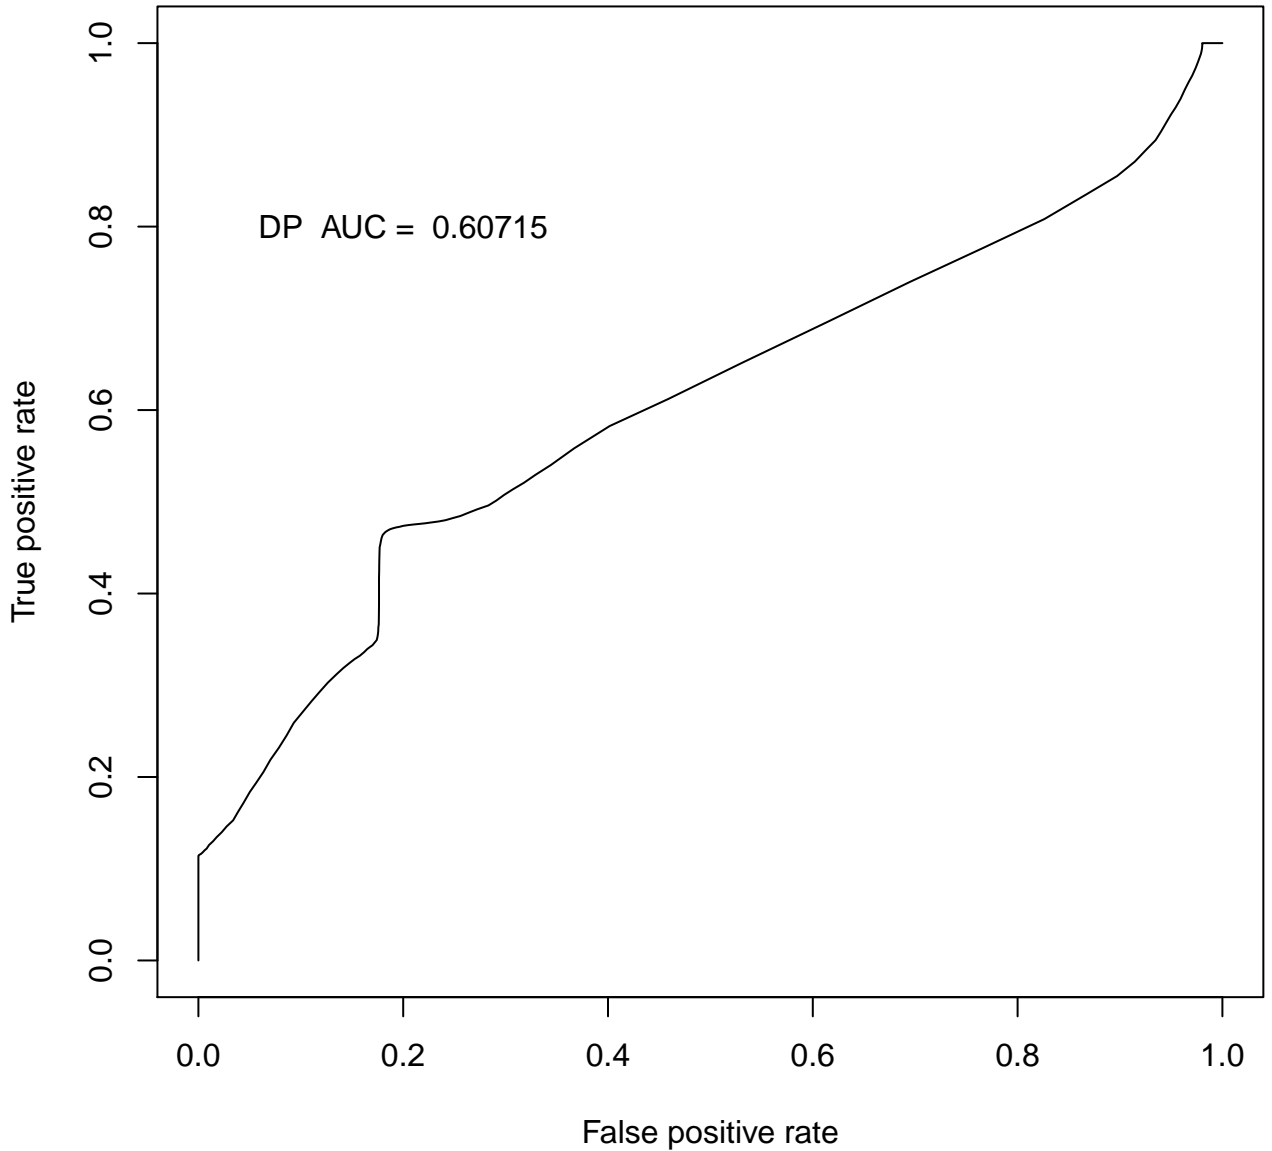

# ROC-plot pp.nsnp.hete MQ

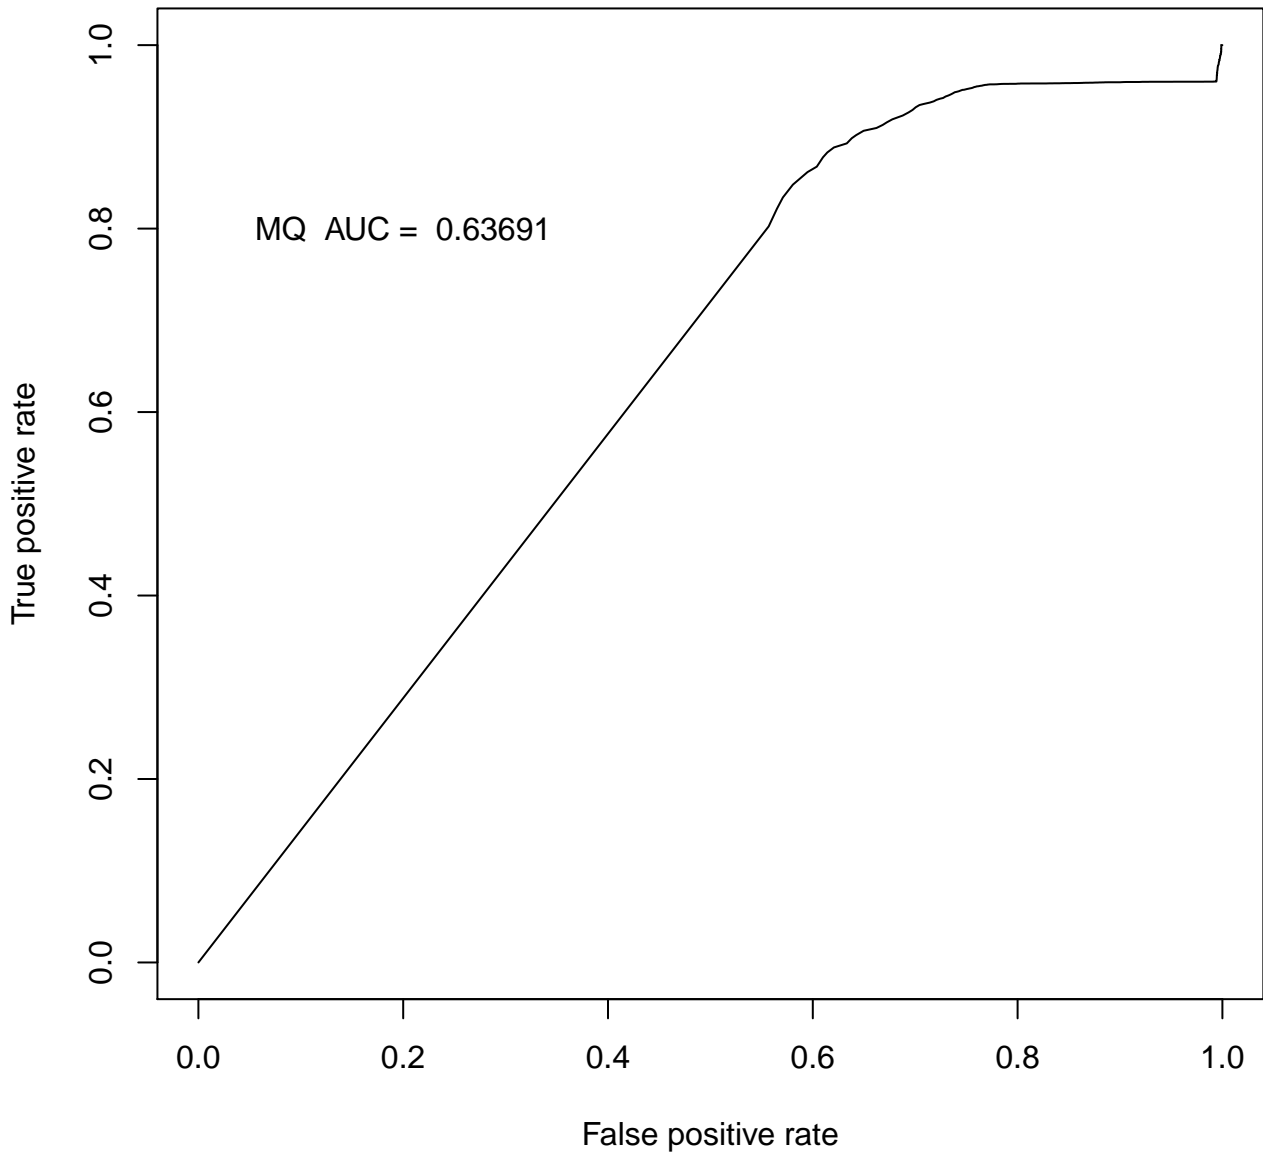

# ROC-plot pp.nsnp.hete MQRankSum

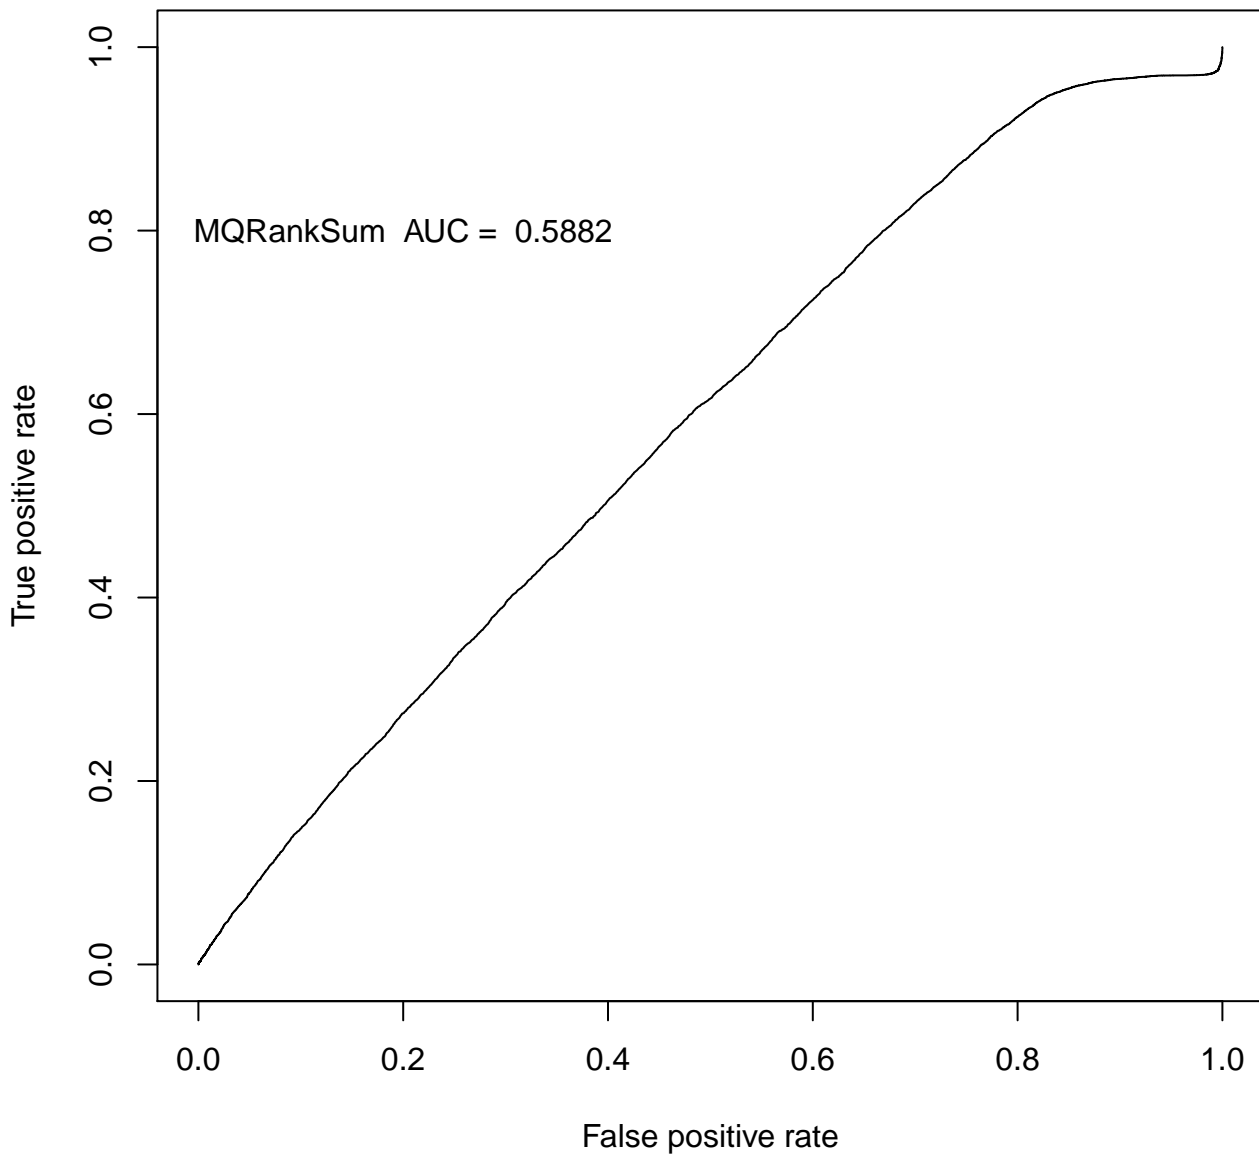

# ROC-plot pp.nsnp.hete ReadPosRankSum

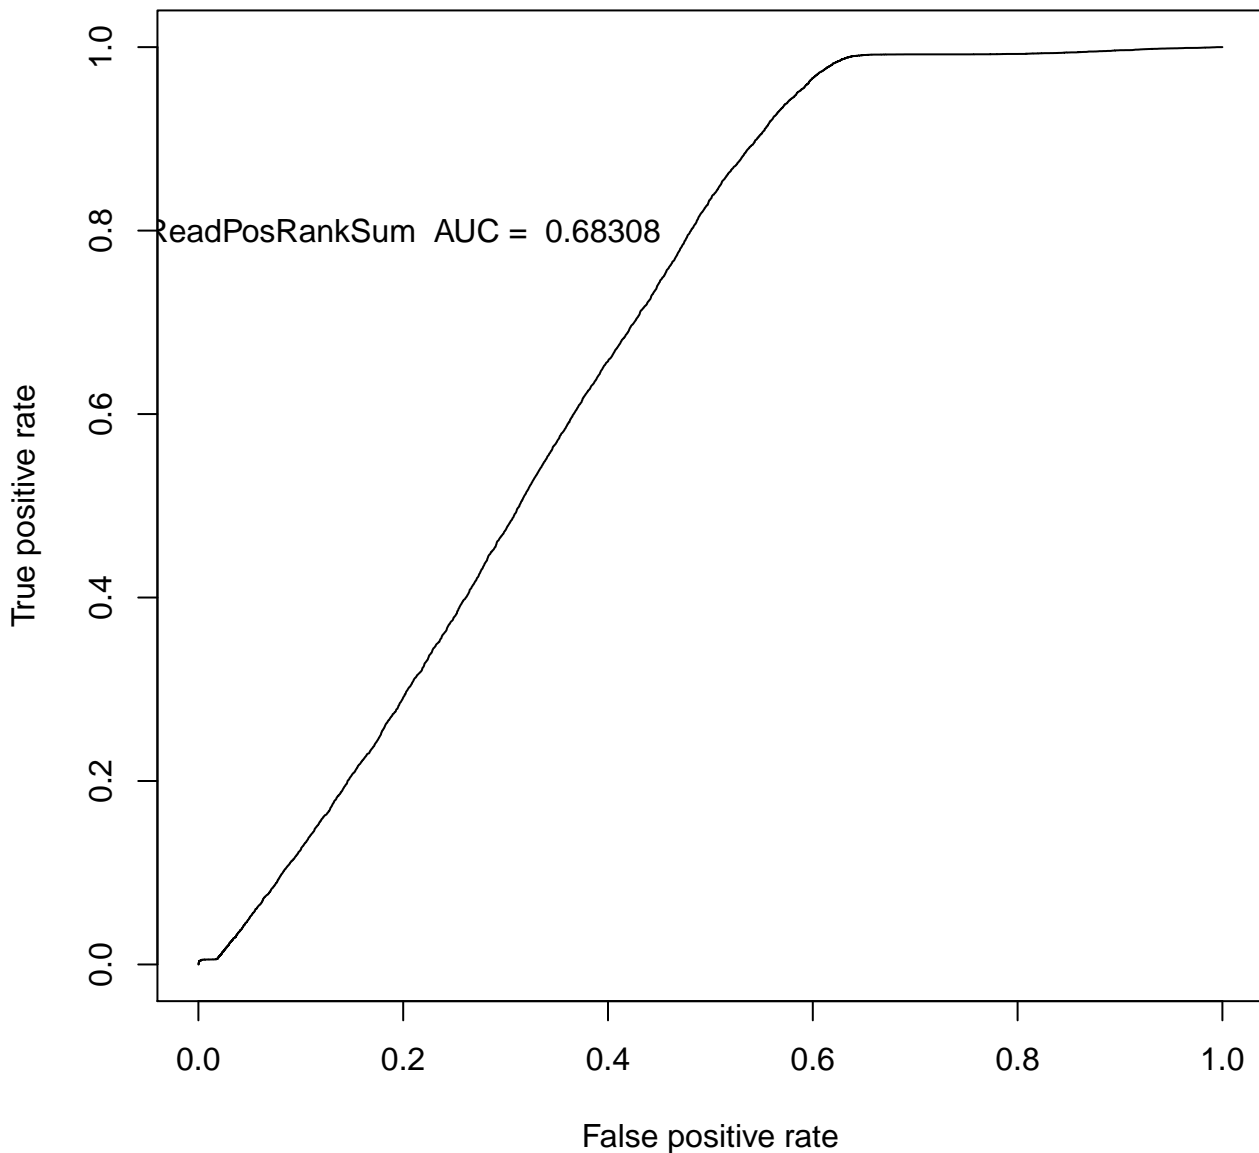

# ROC-plot pp.nsnp.hete GQ

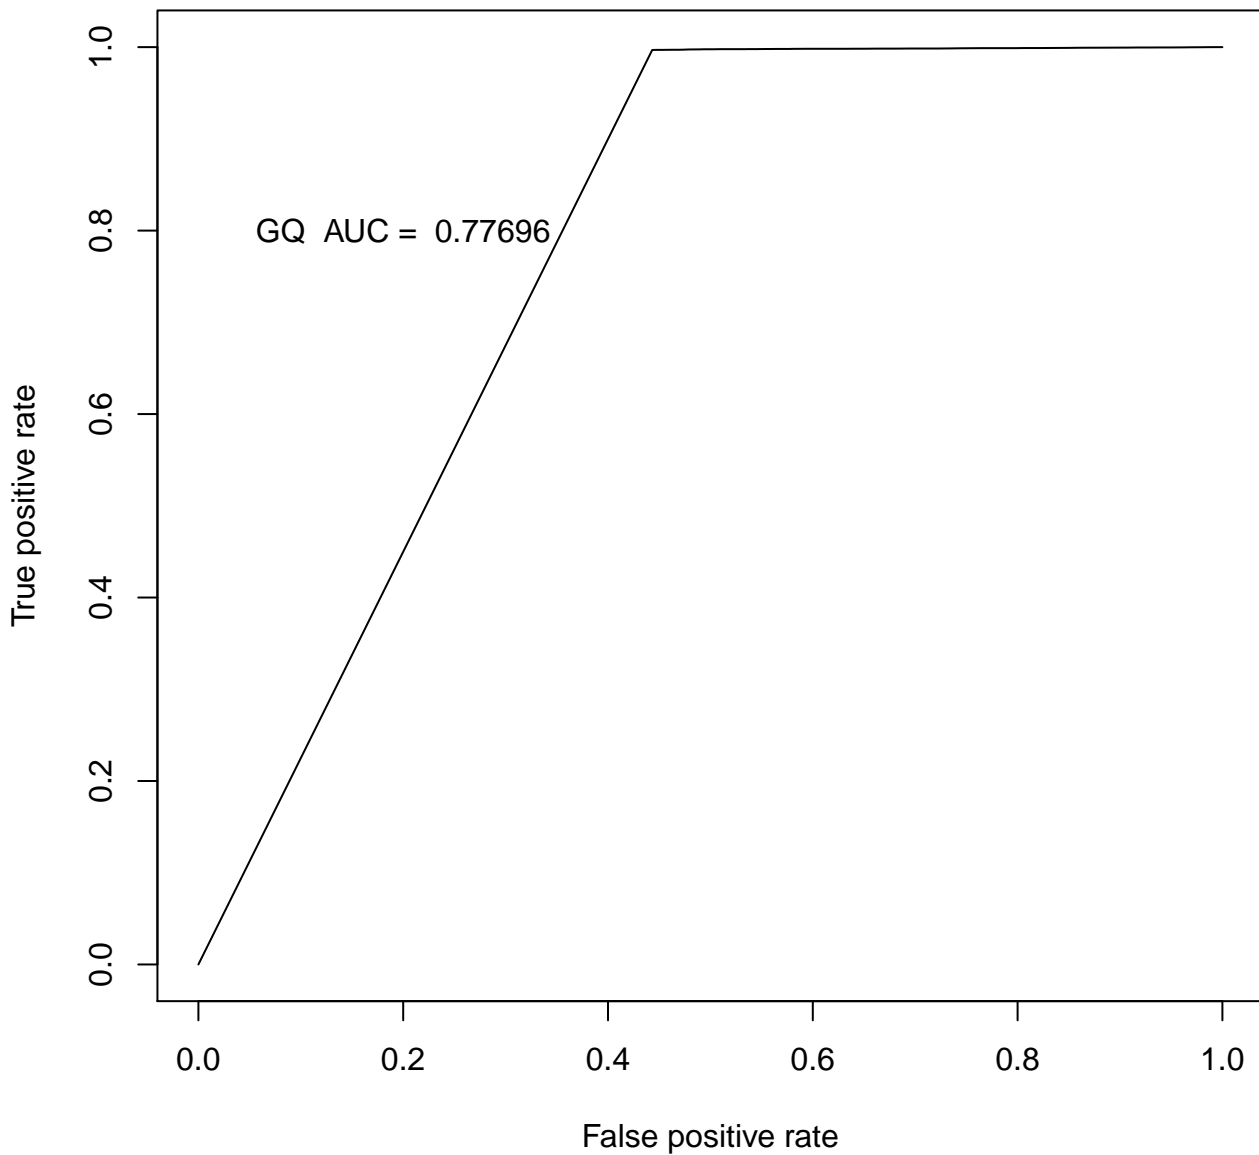

# ROC-plot pp.nsnp.hete ADT

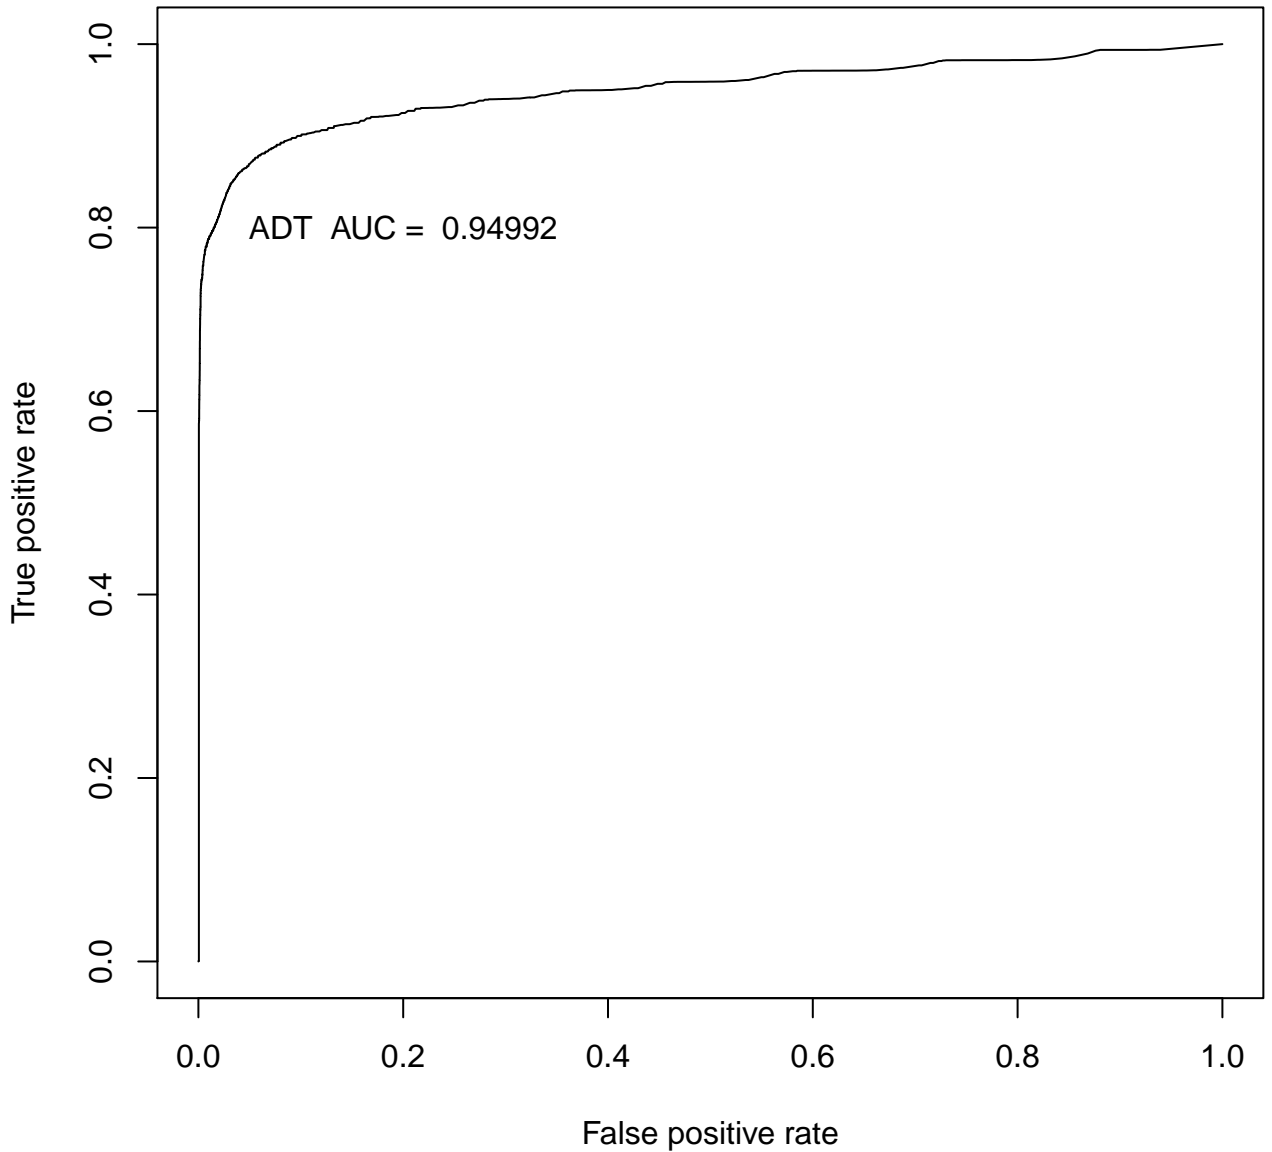



# ROC-plot pp.nsnp.hete ADTL

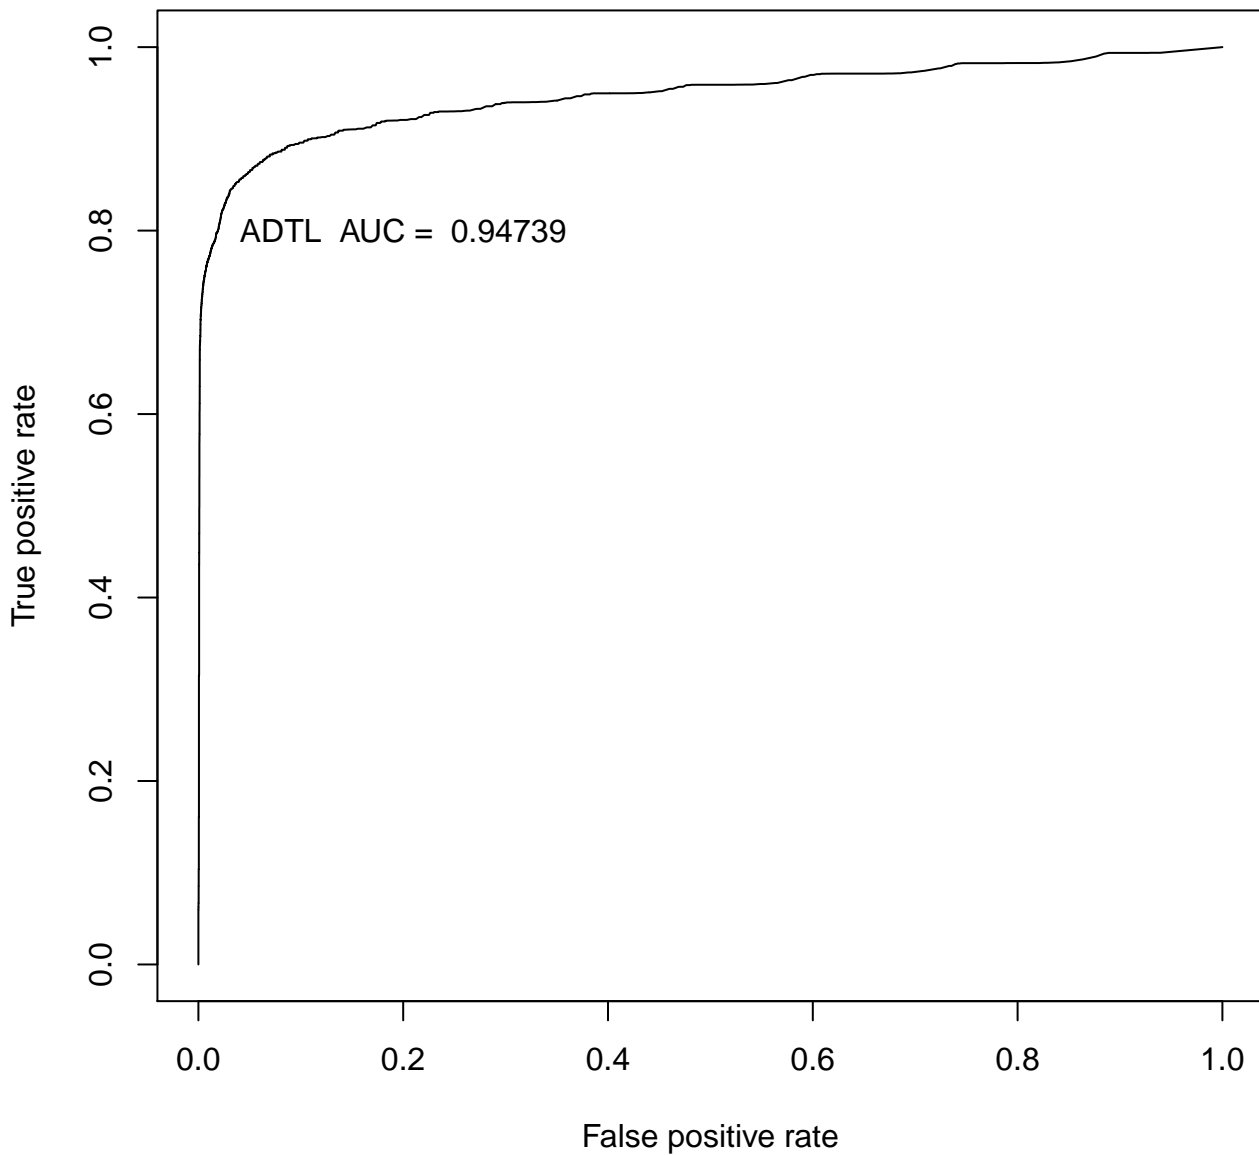

# ROC-plot pp.nsnp.hete FS

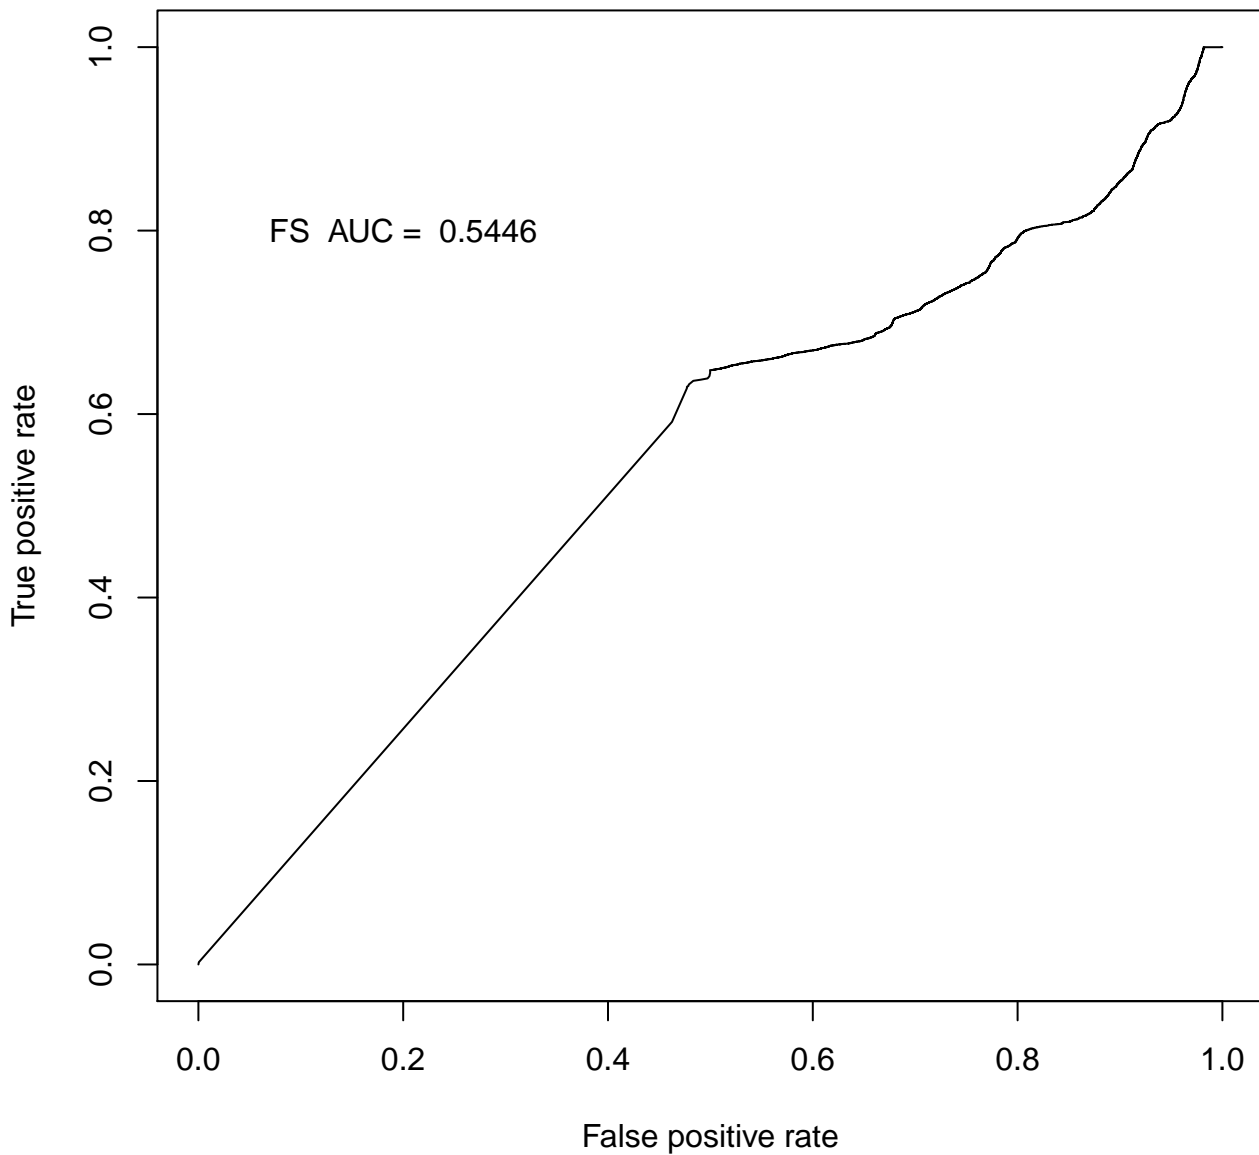

# ROC-plot pp.nsnp.homo BaseQRankSum

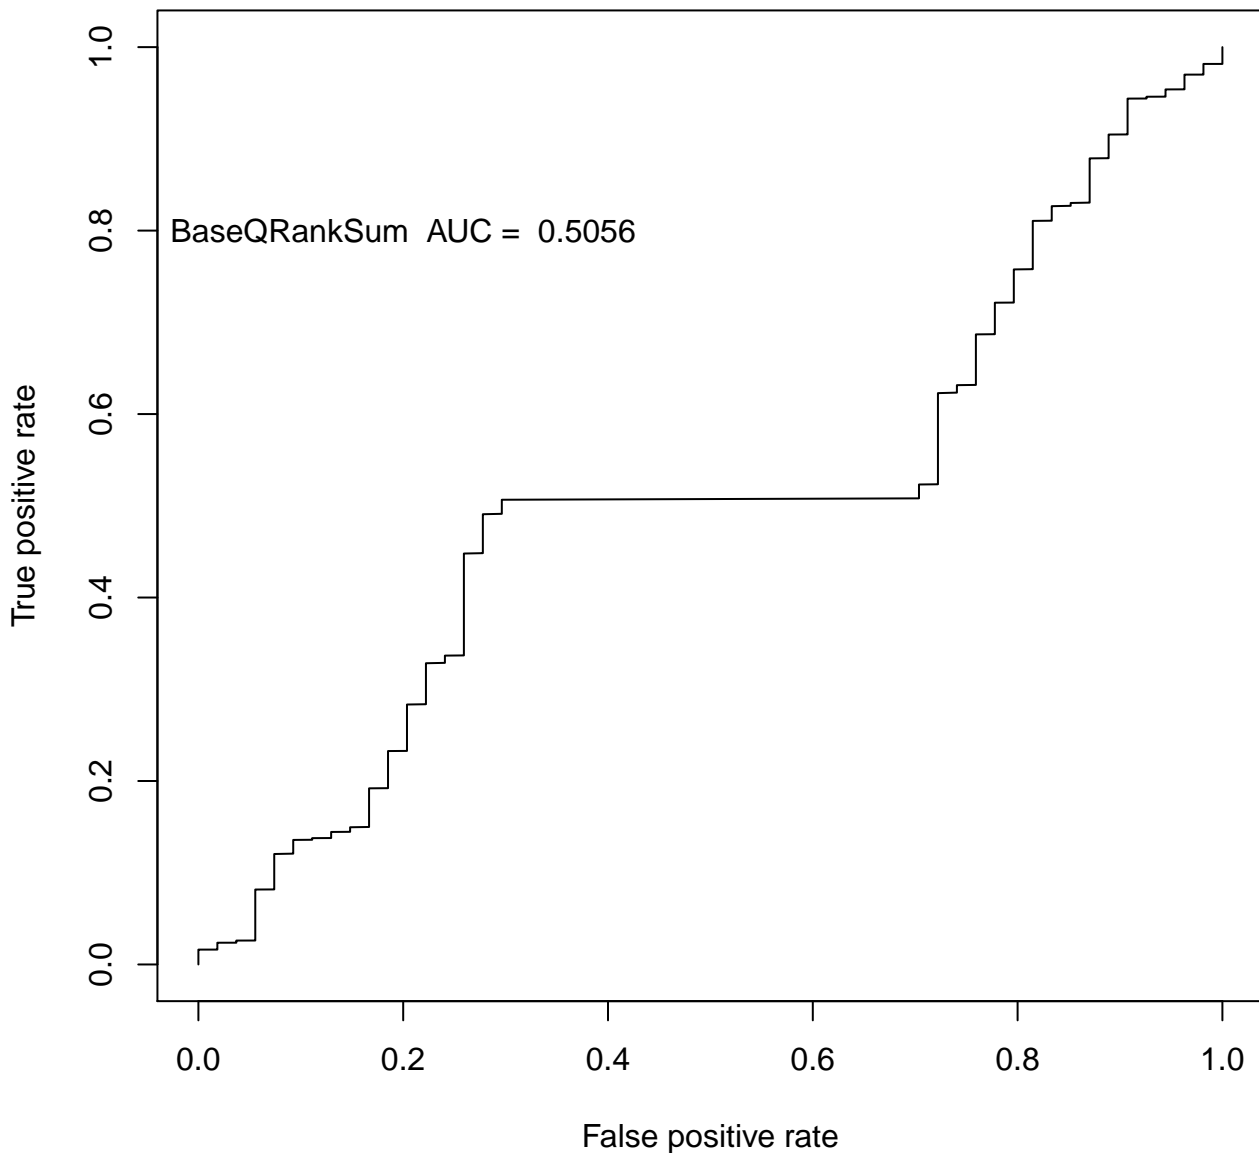

# ROC-plot pp.nsnp.homo ClippingRankSum

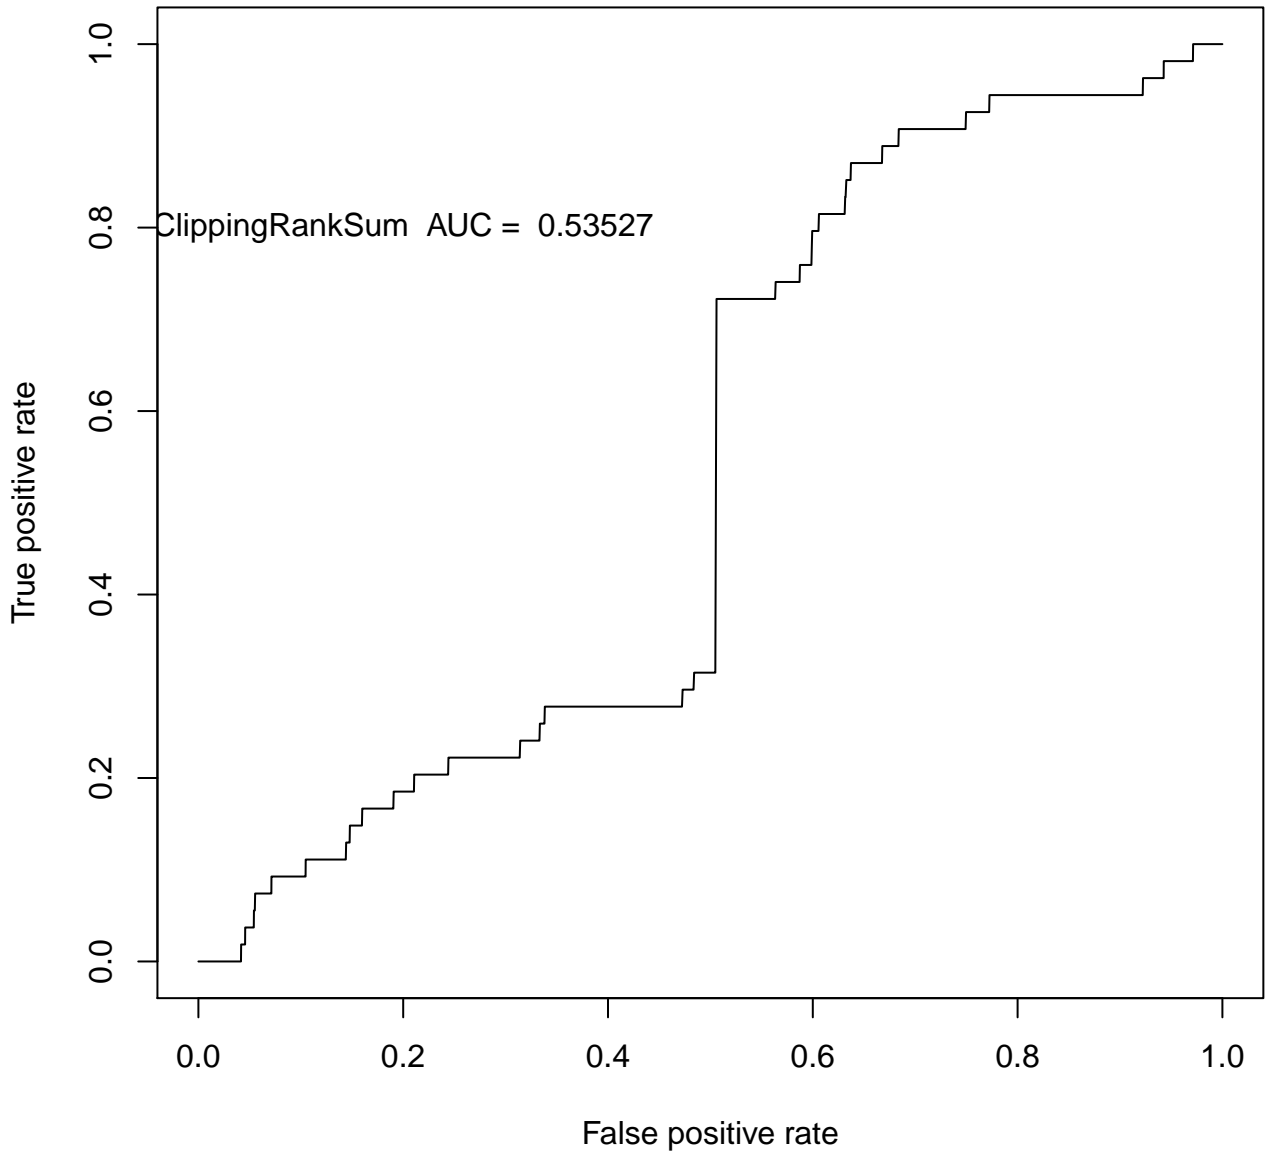

# ROC-plot pp.nsnp.homo DP

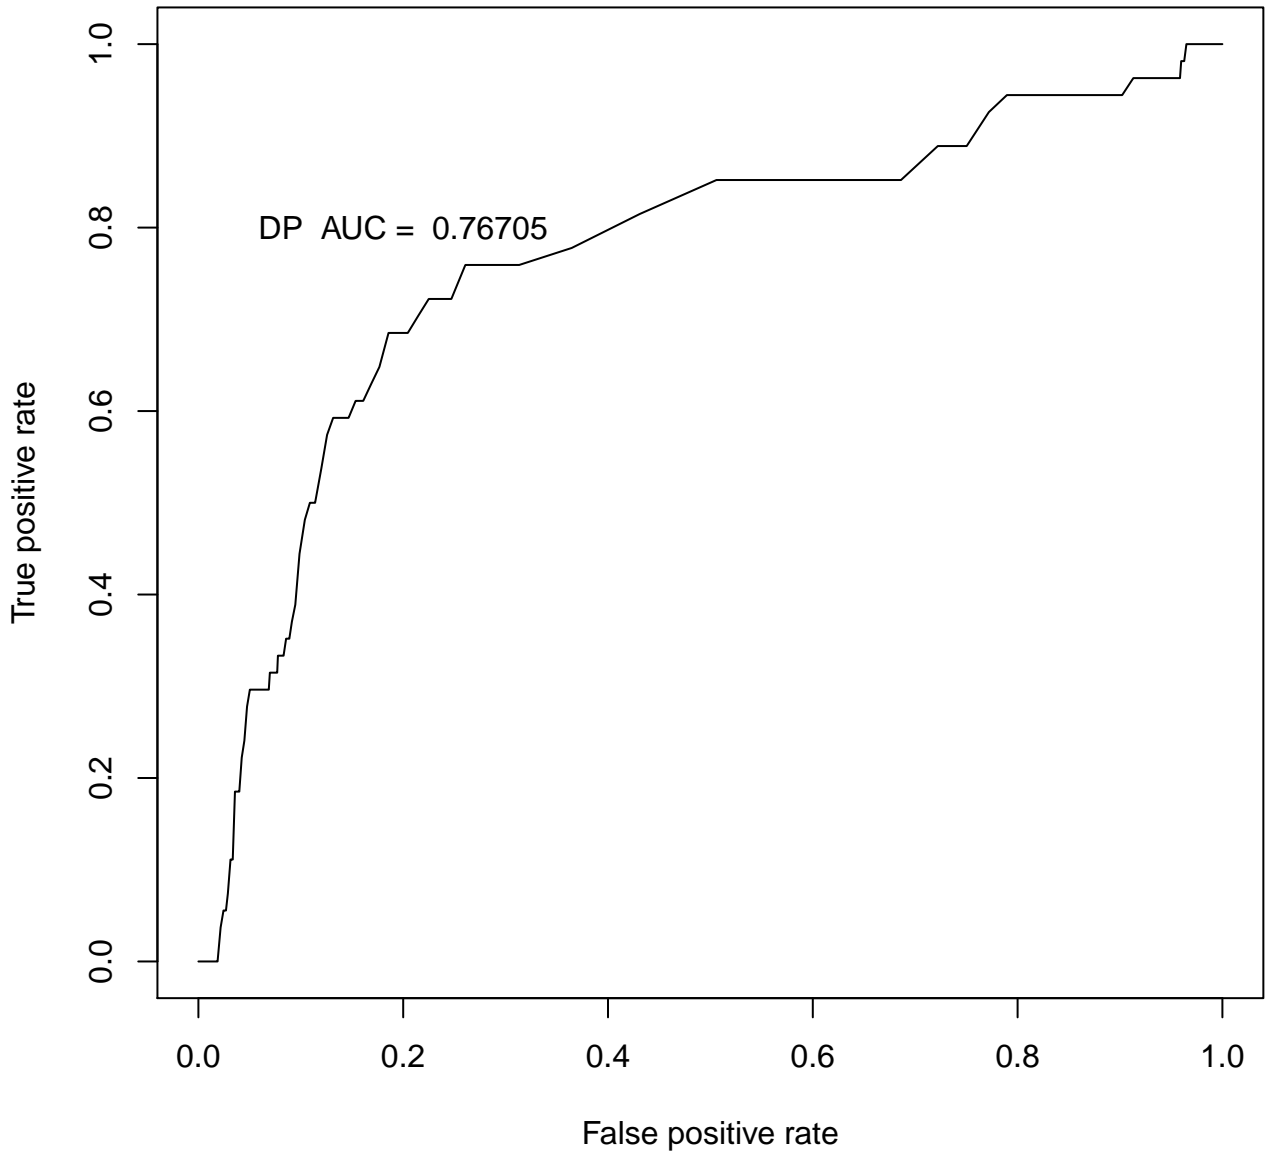

# ROC-plot pp.nsnp.homo MQ

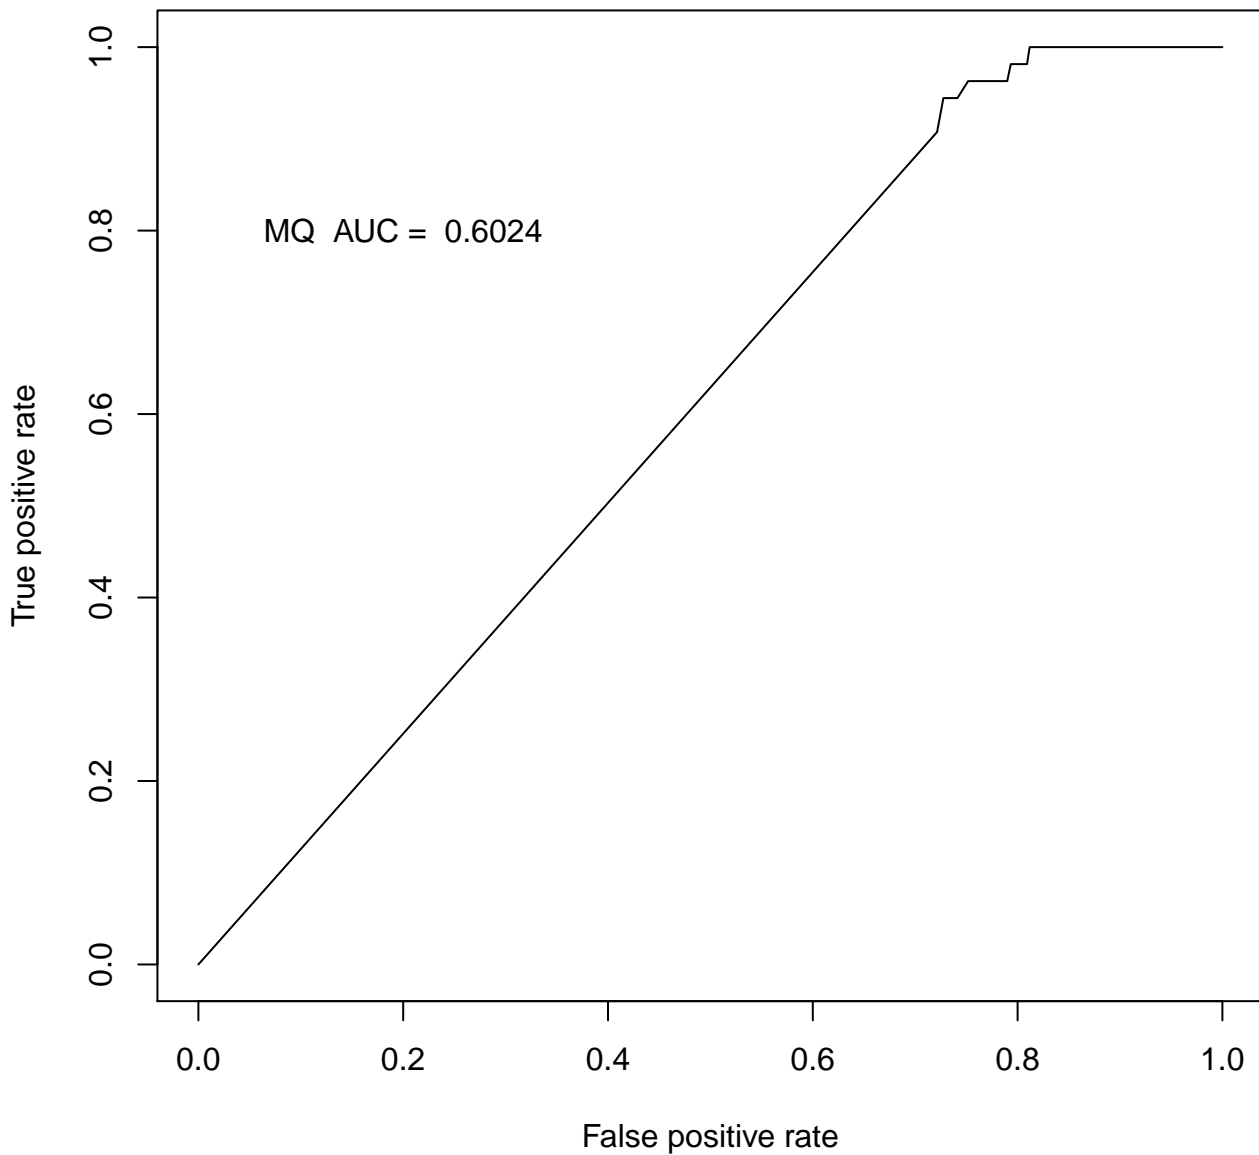

# ROC-plot pp.nsnp.homo MQRankSum

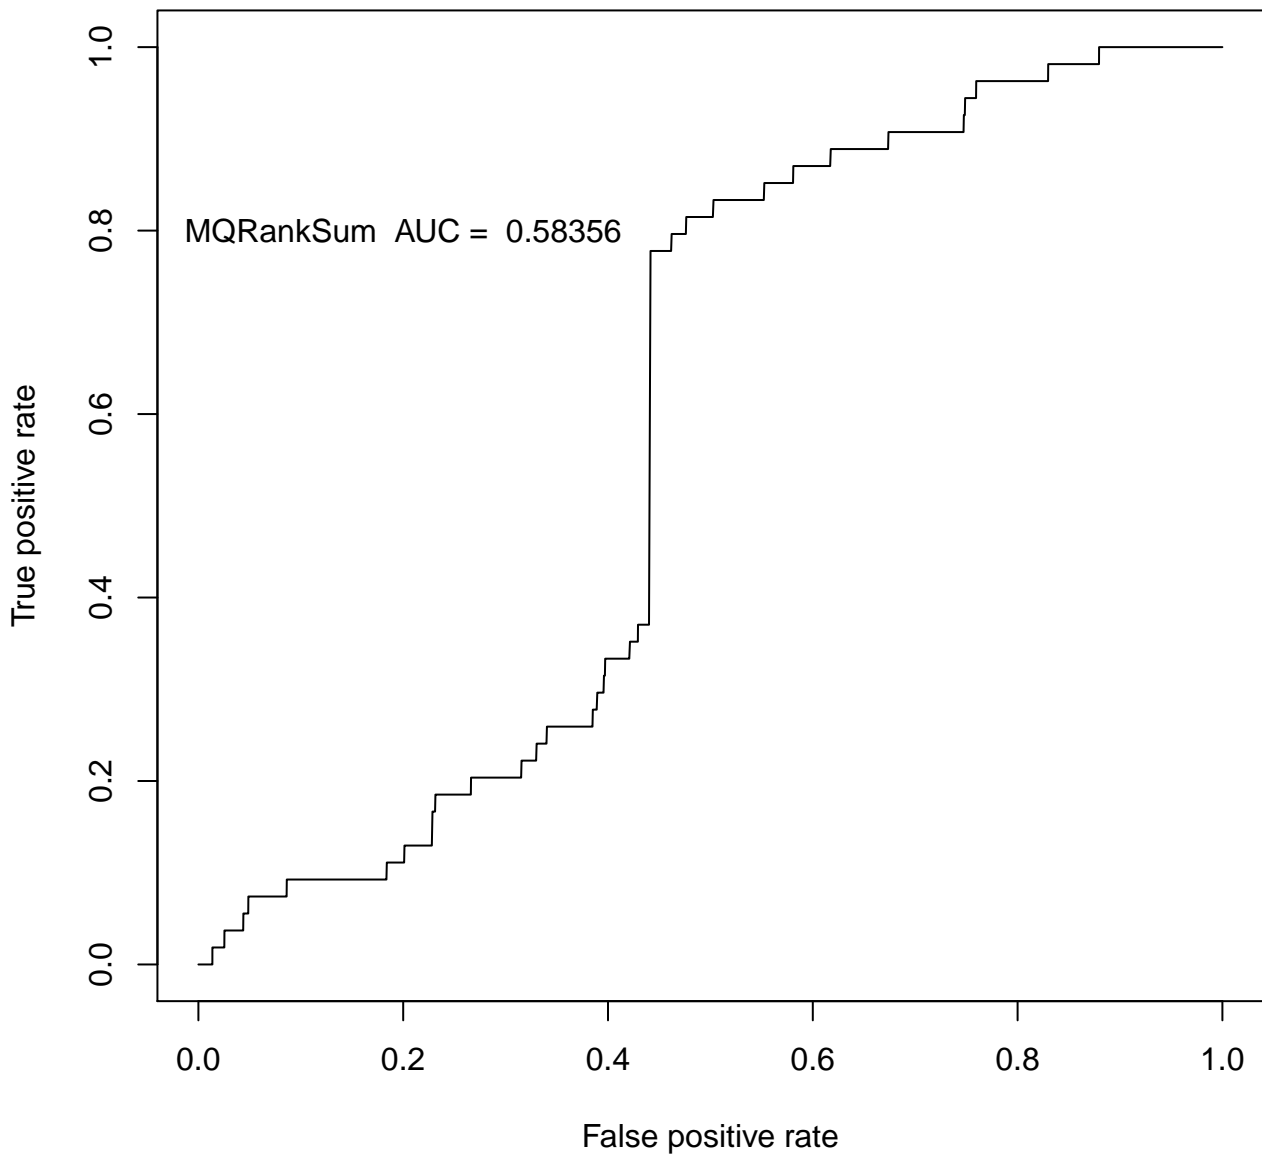

# ROC-plot pp.nsnp.homo ReadPosRankSum

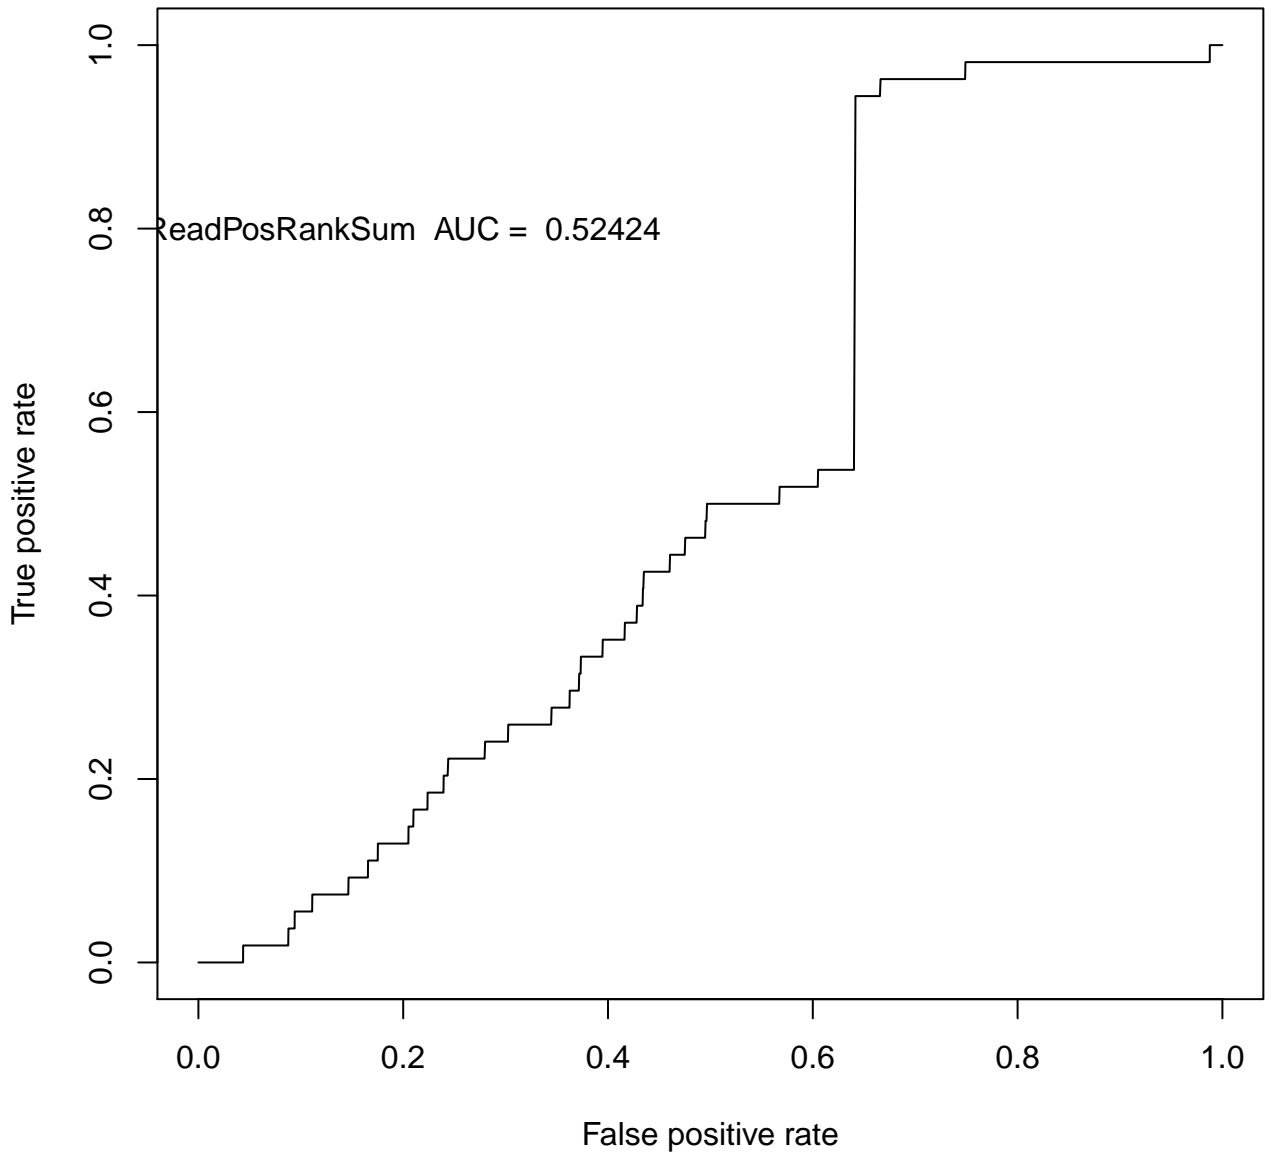



# ROC-plot pp.nsnp.homo GQ

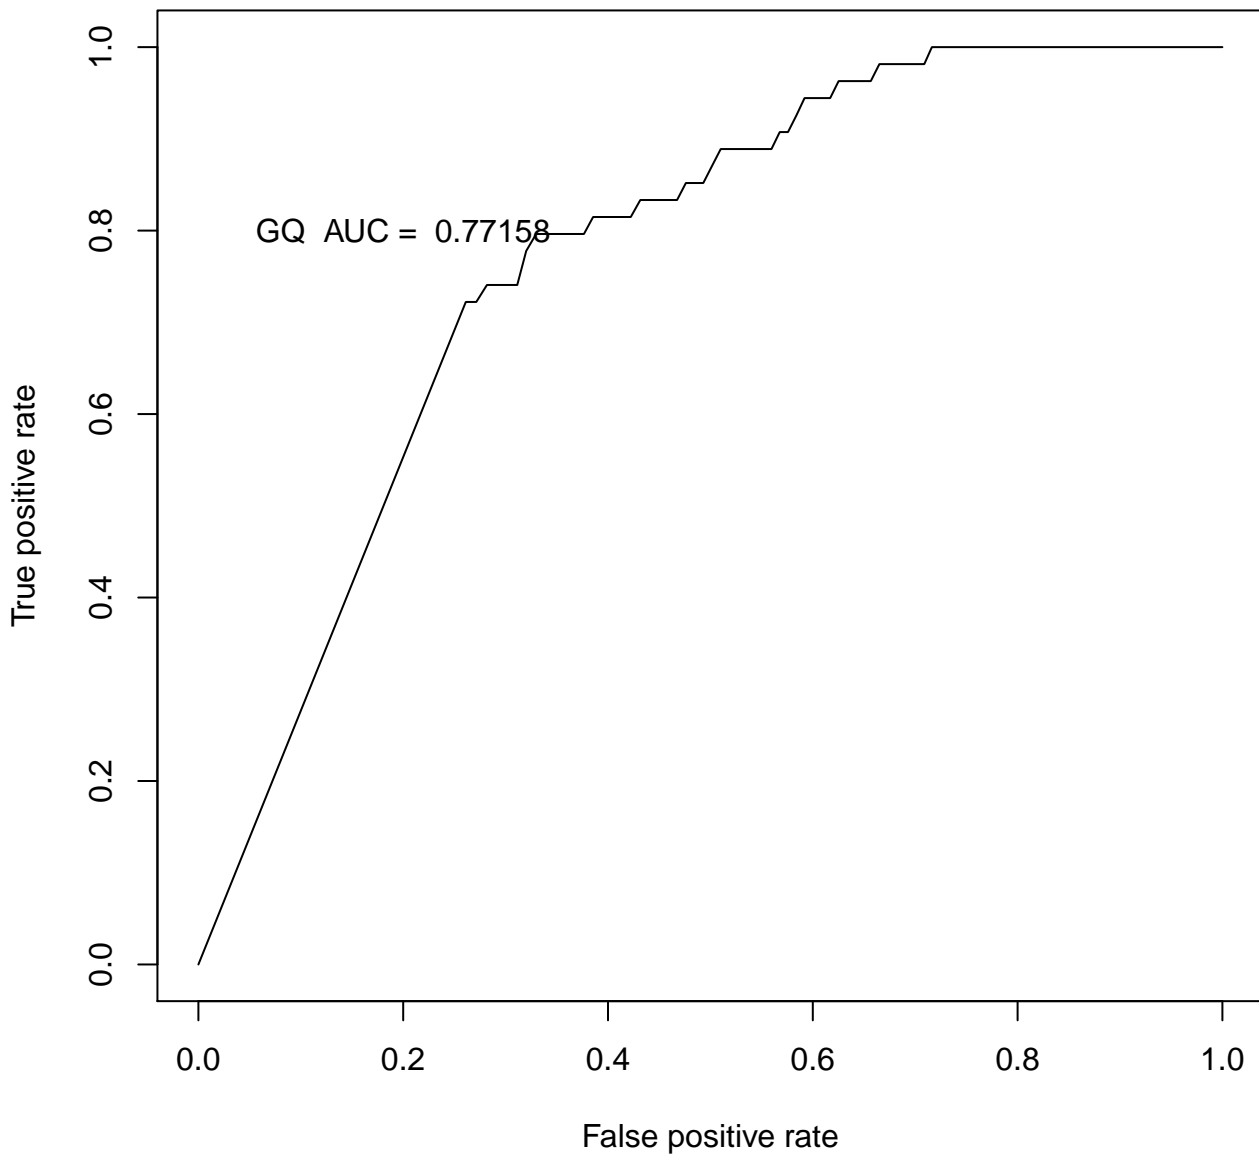

# ROC-plot pp.nsnp.homo ADT

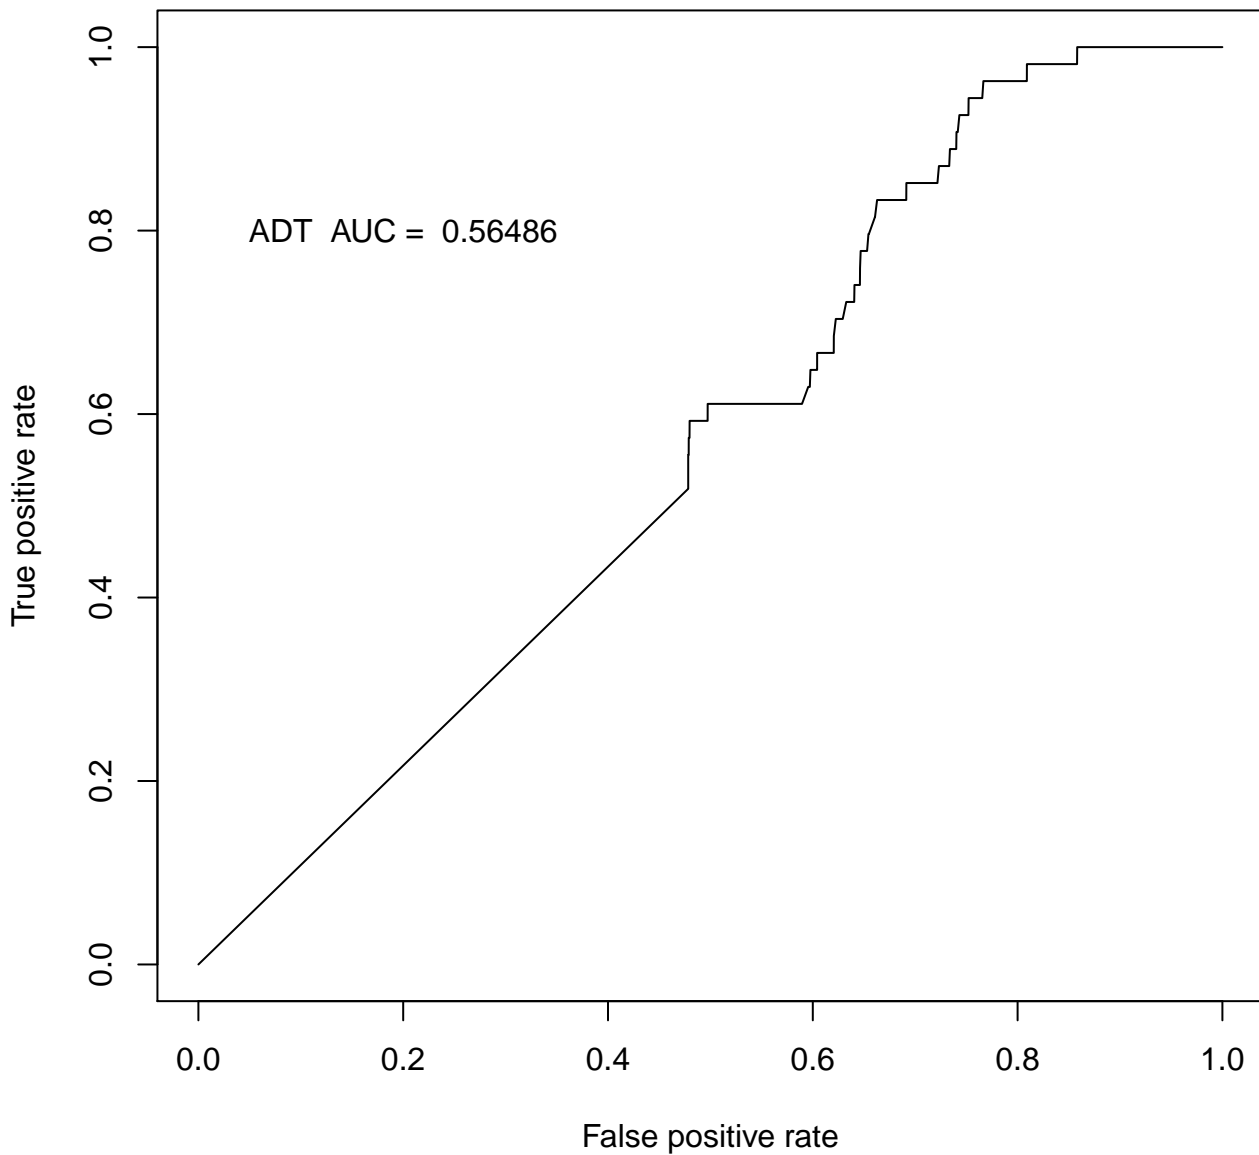

# ROC-plot pp.nsnp.homo ADTL

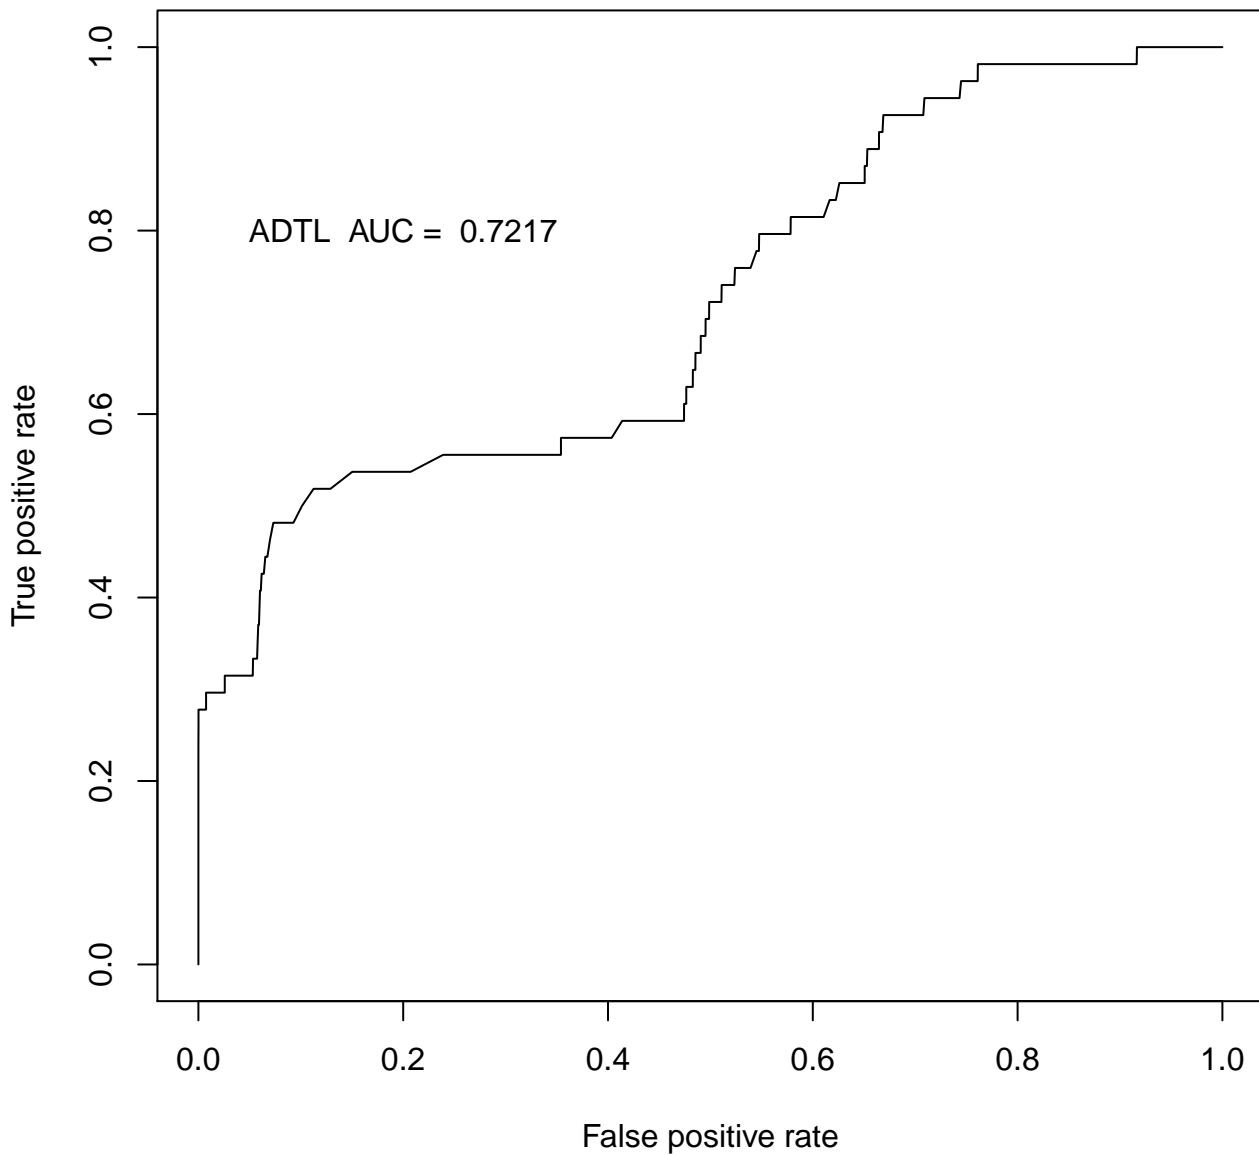

# ROC-plot pp.nsnp.homo FS

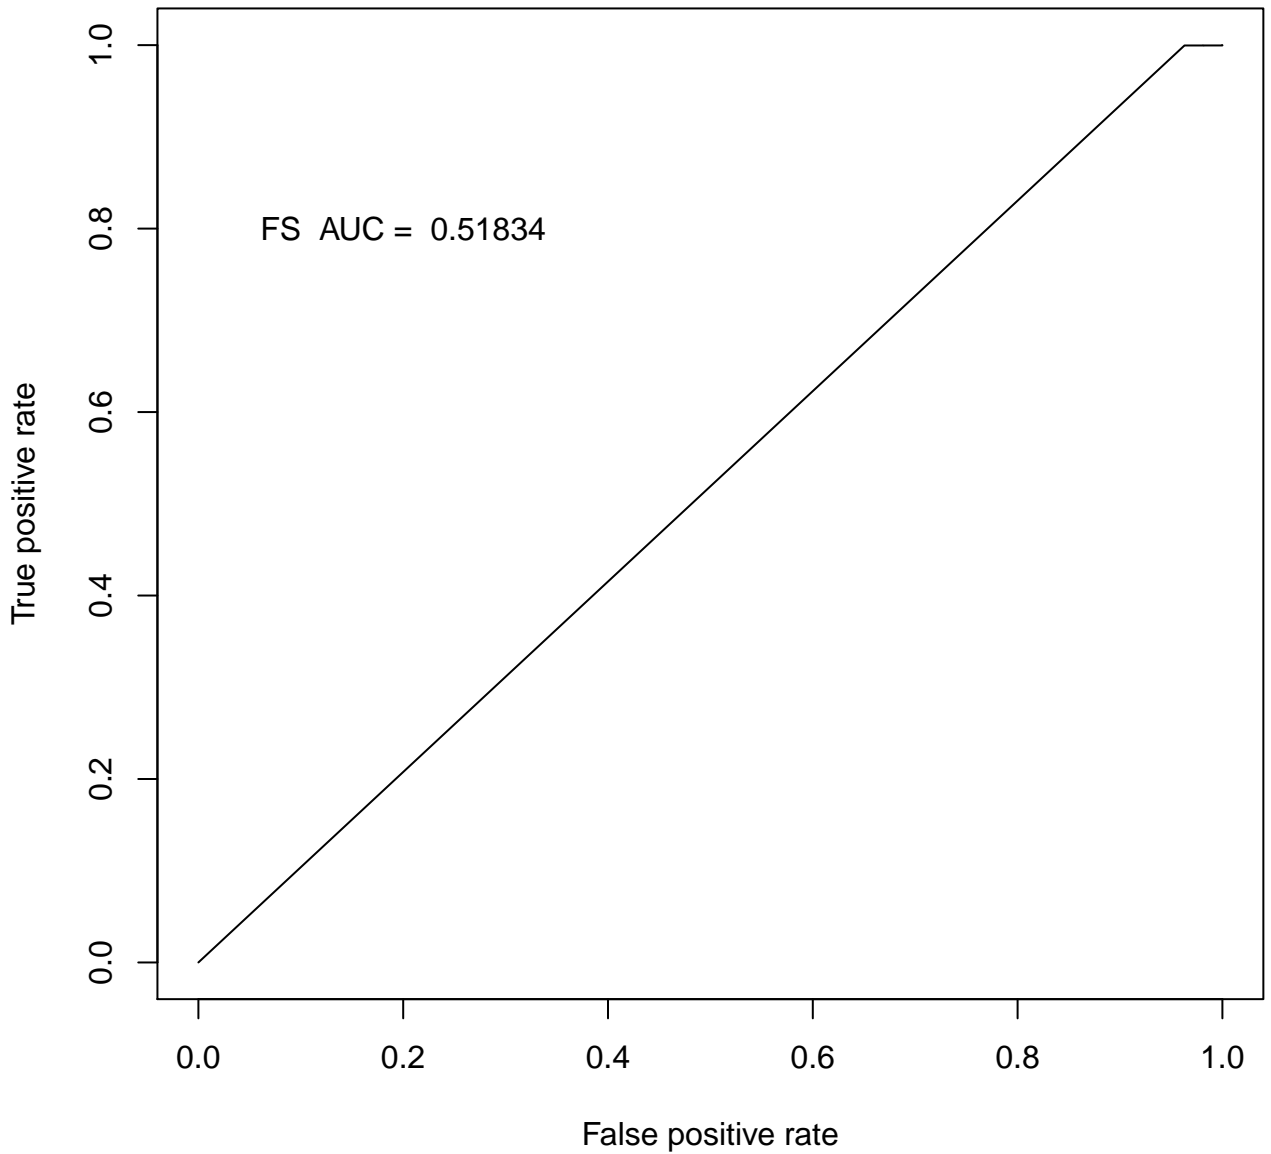

# ROC-plot pp.snp.hete BaseQRankSum

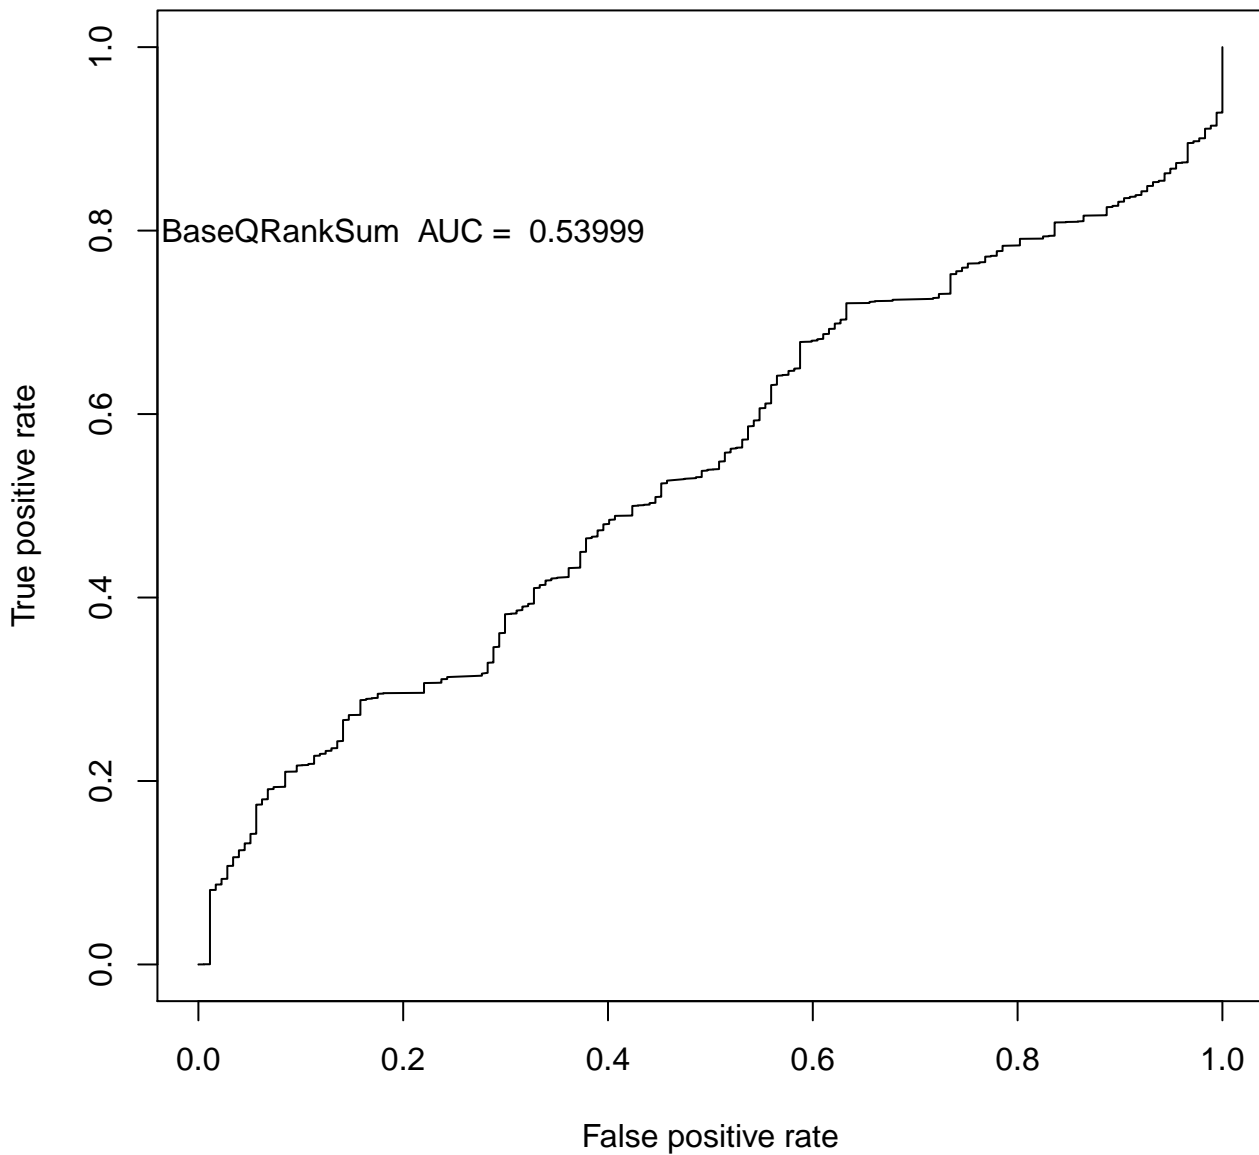

# ROC-plot pp.snp.hete ClippingRankSum

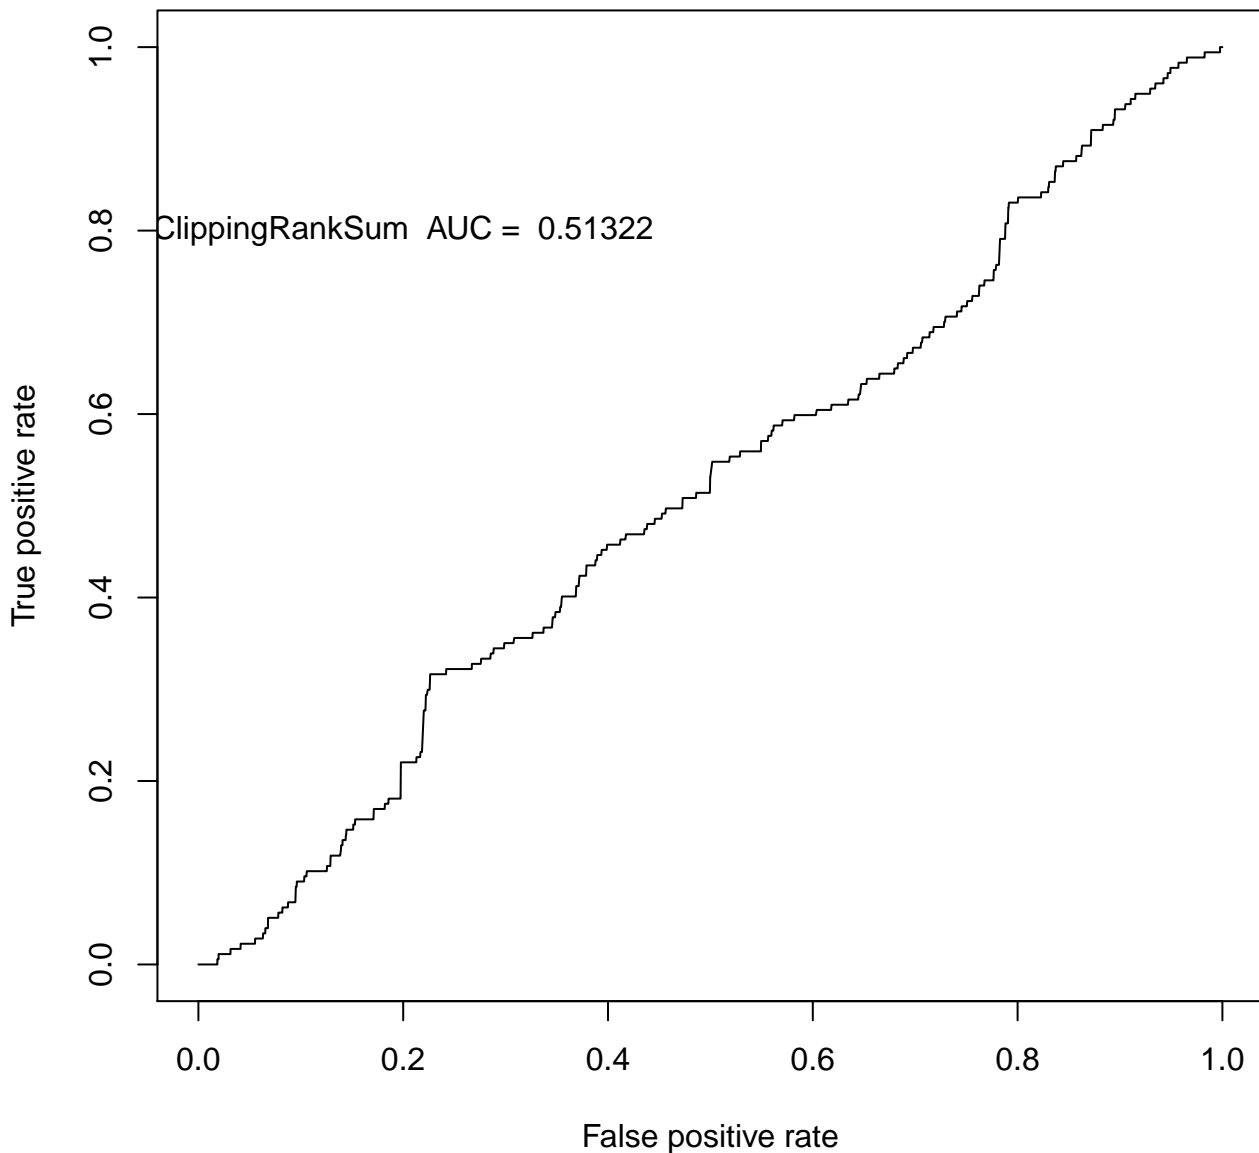

# ROC-plot pp.snp.hete DP

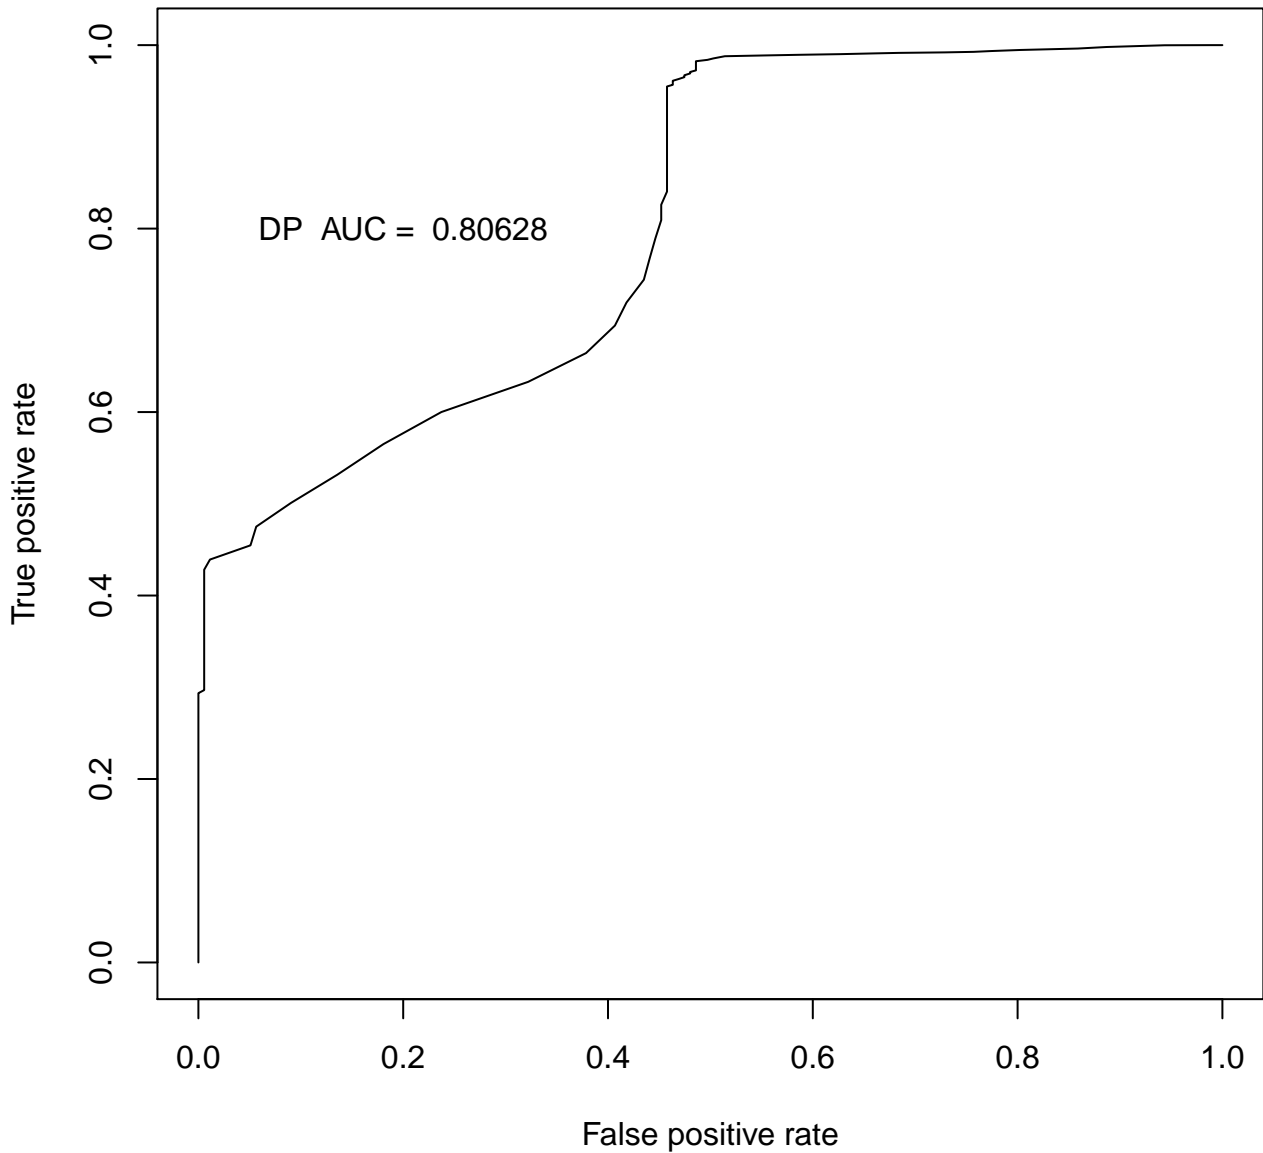

# ROC-plot pp.snp.hete MQ

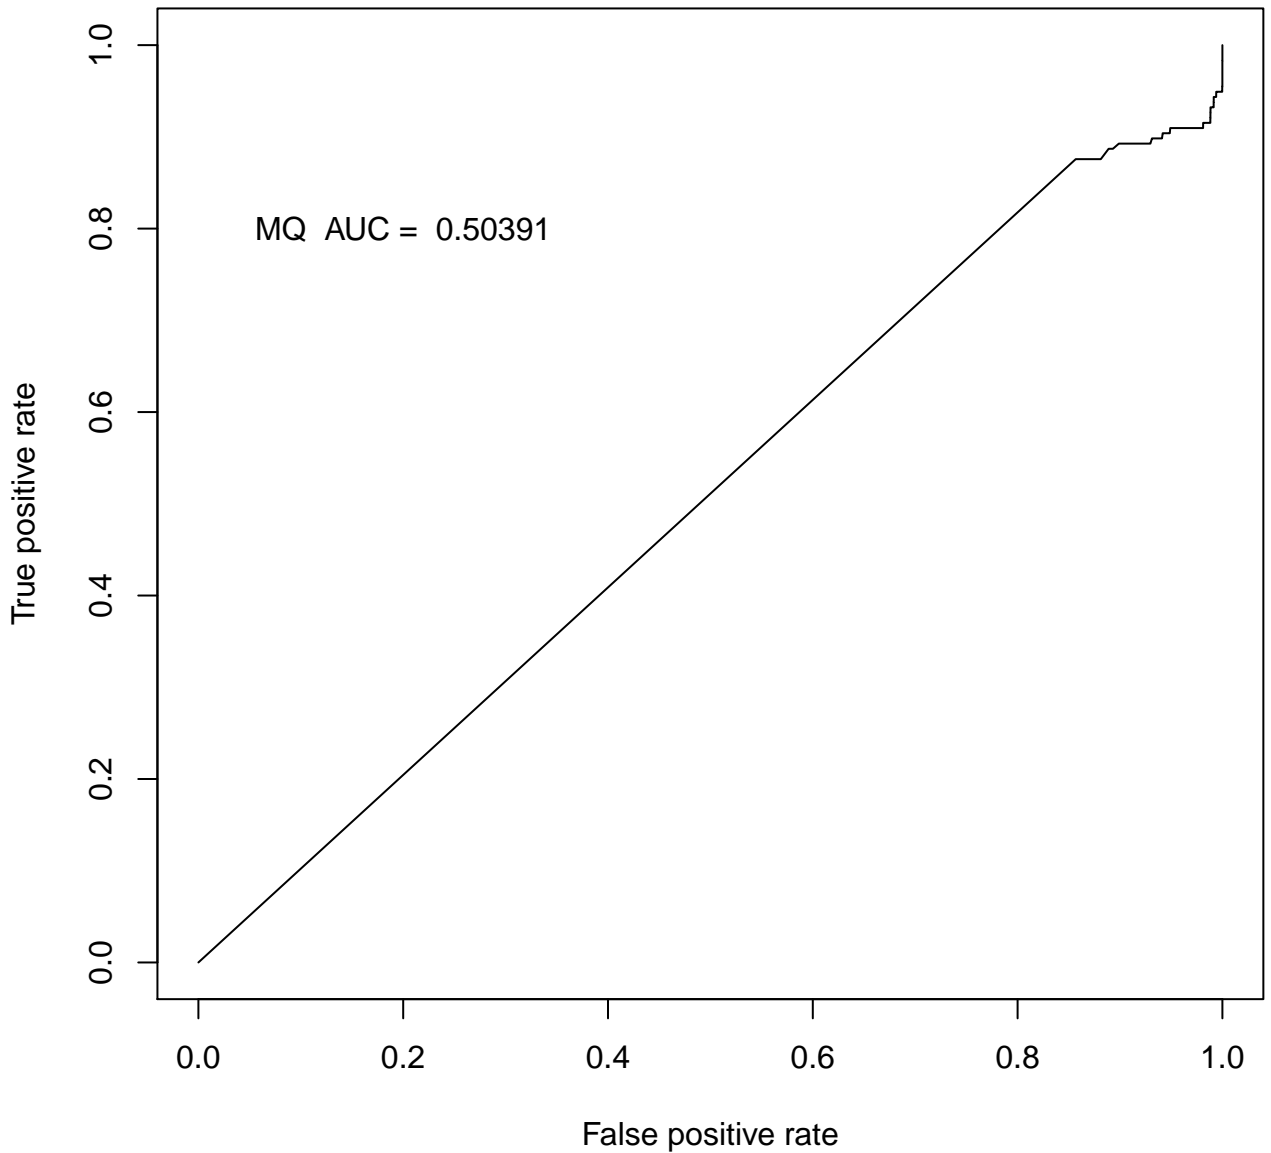



# ROC-plot pp.snp.hete MQRankSum

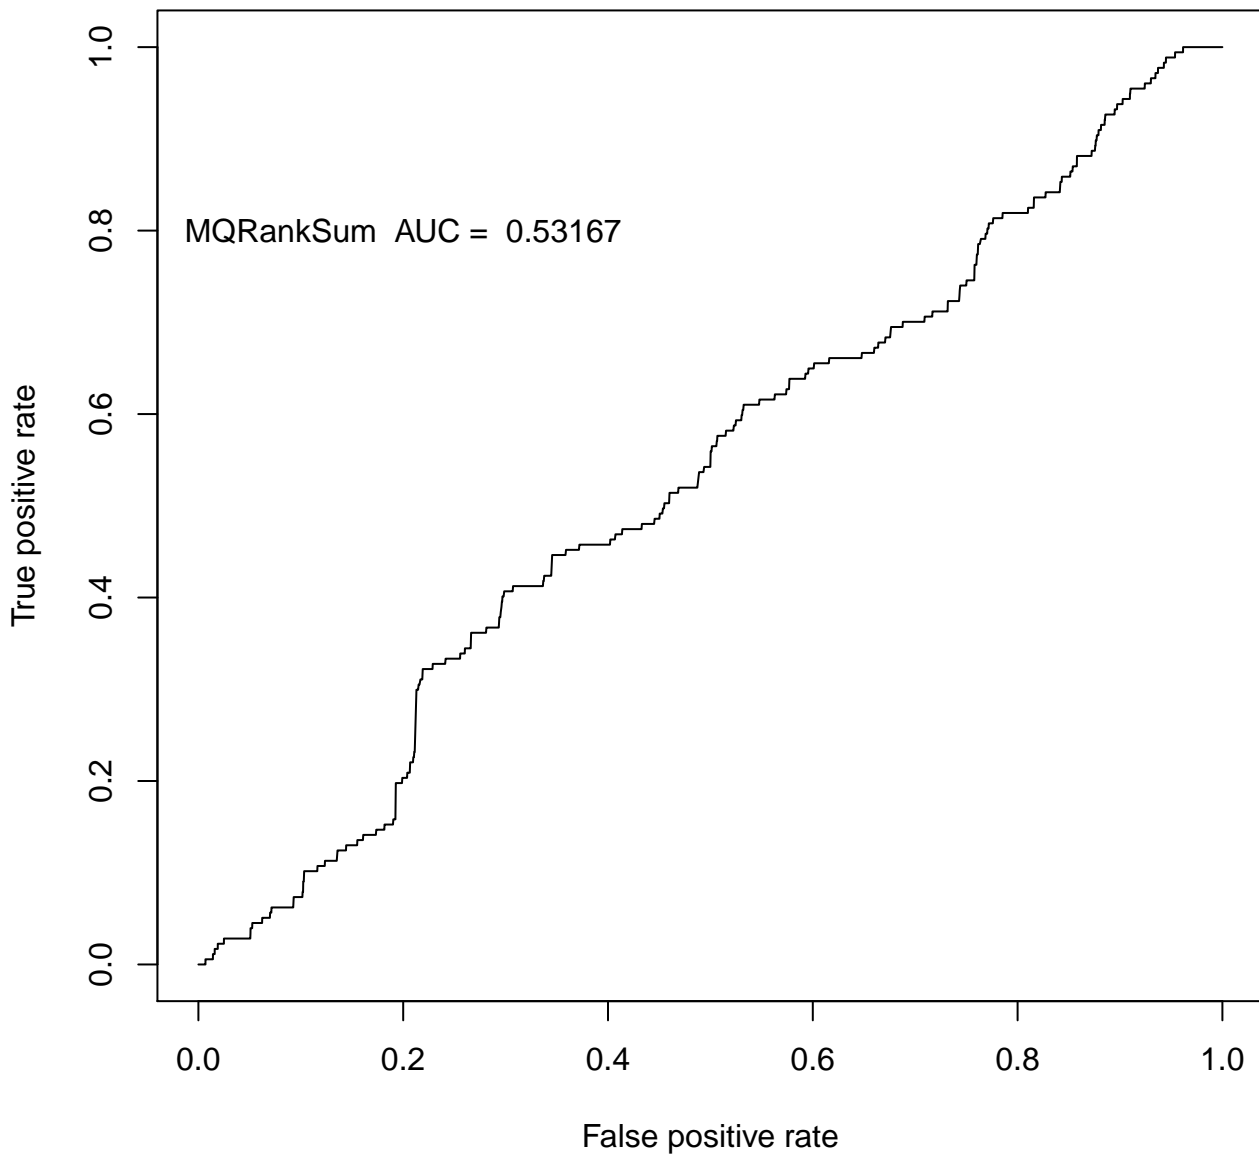

# ROC-plot pp.snp.hete ReadPosRankSum

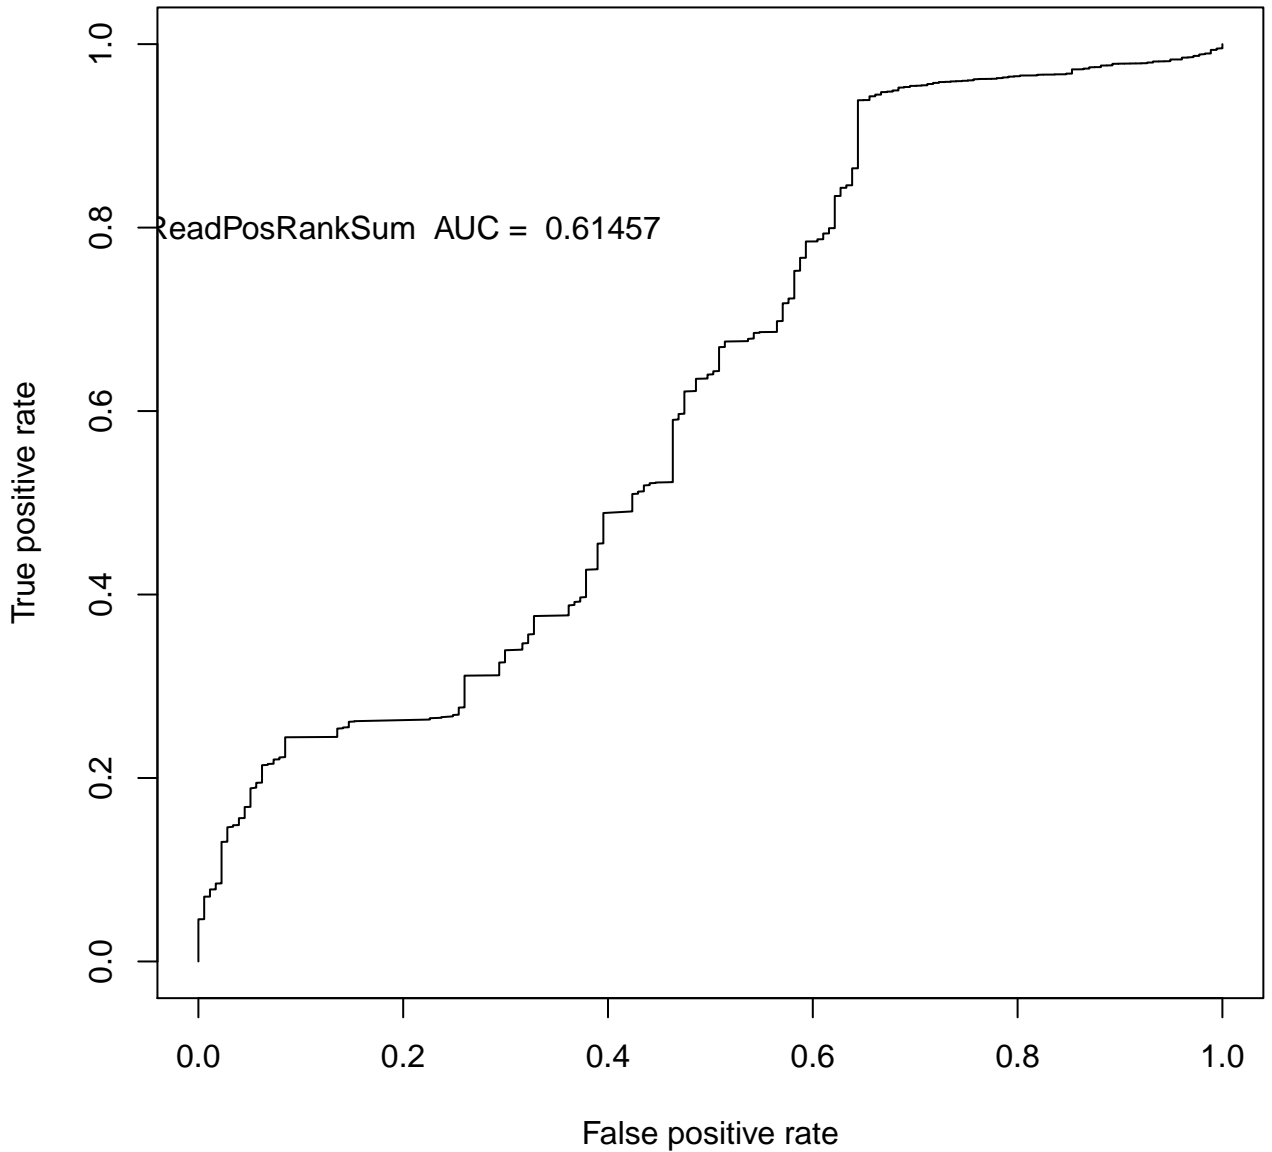

# ROC-plot pp.snp.hete GQ

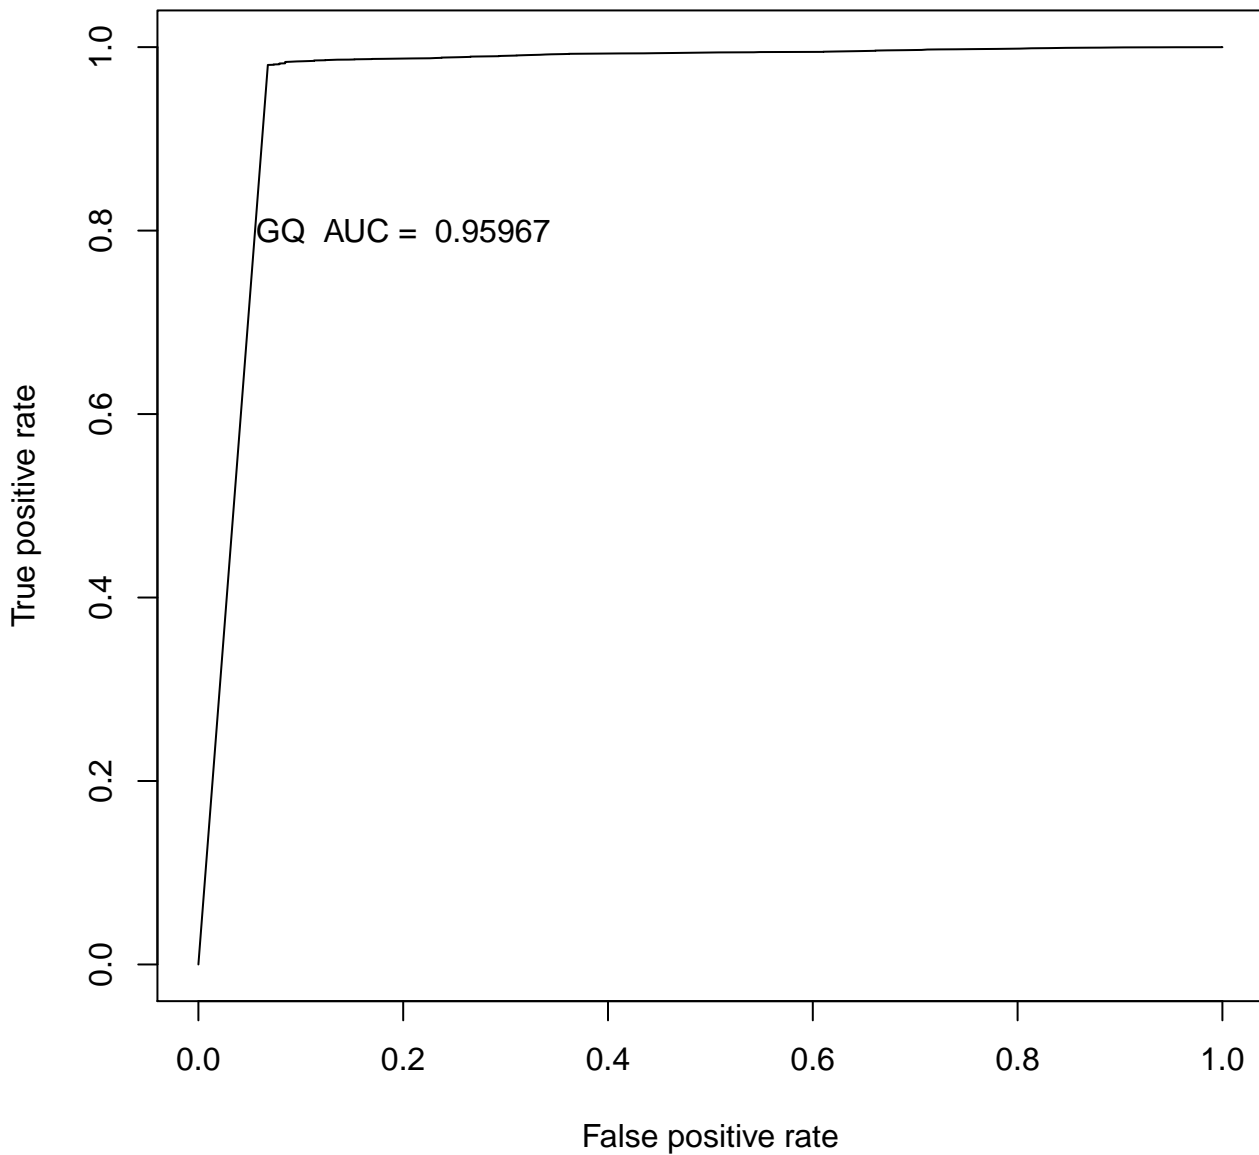

# ROC-plot pp.snp.hete ADT

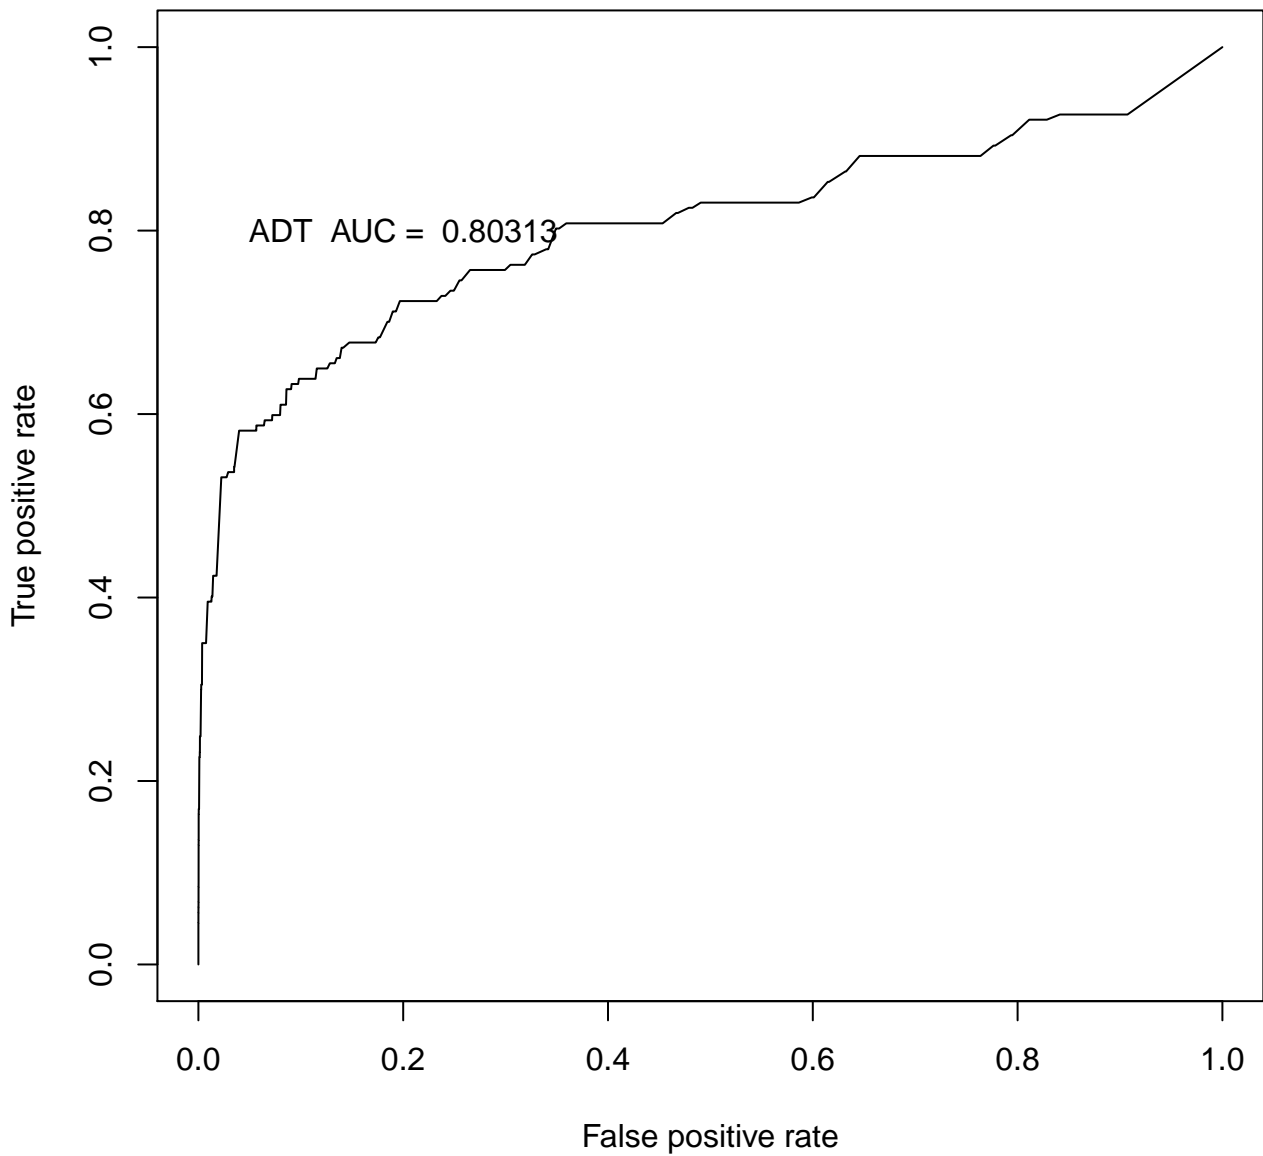

# ROC-plot pp.snp.hete ADTL

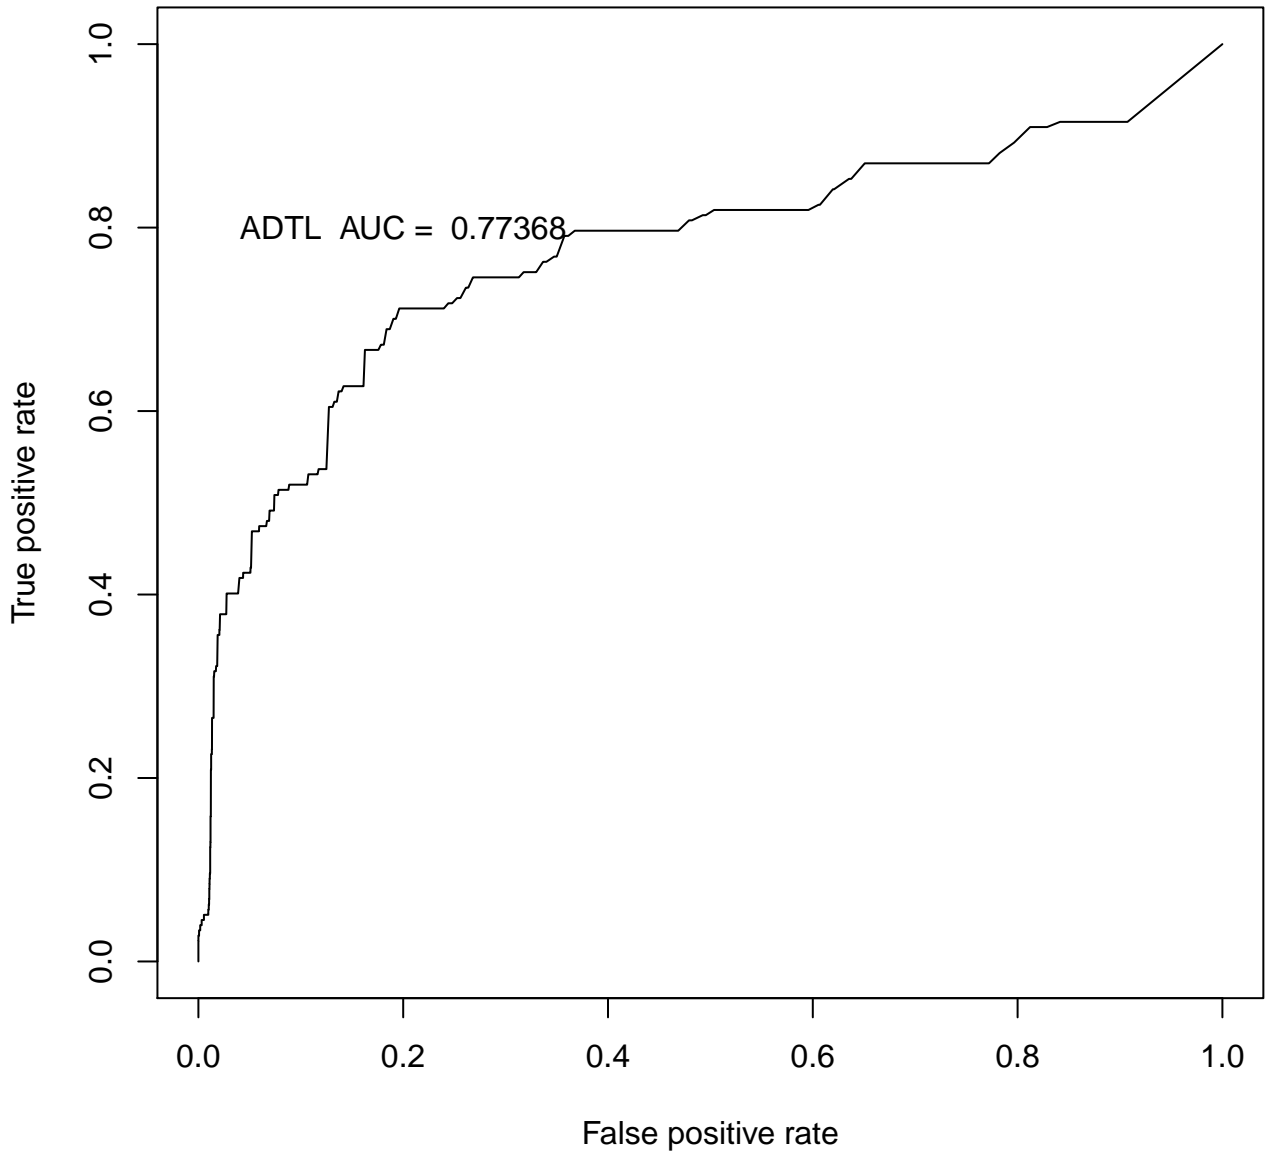

# ROC-plot pp.snp.hete FS

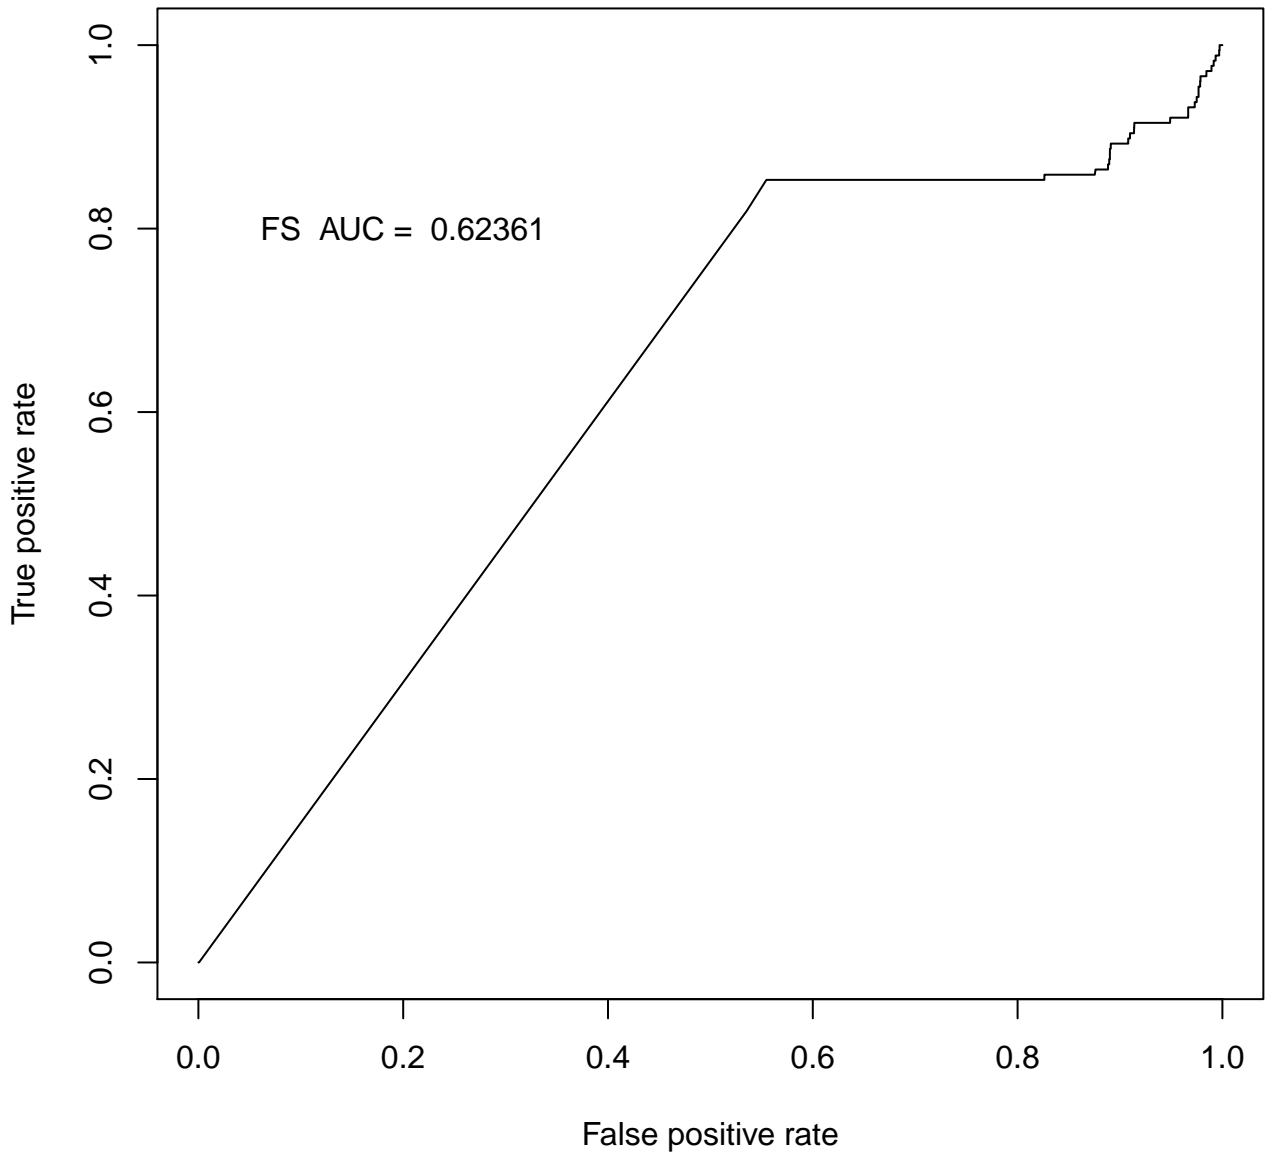

# ROC-plot pp.snp.homo BaseQRankSum

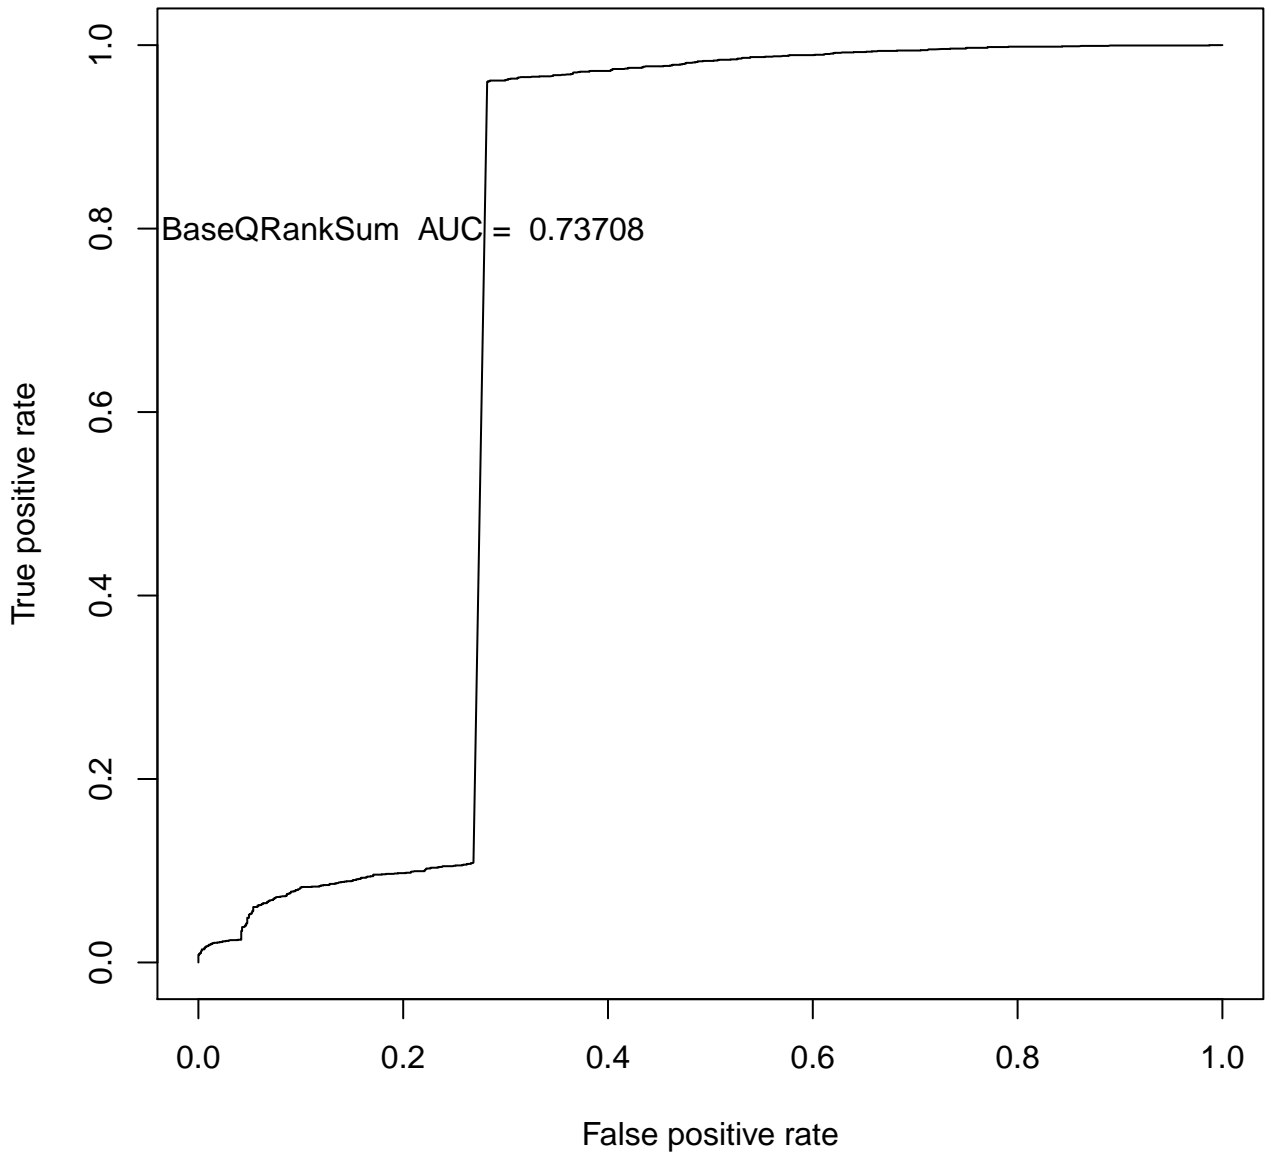

# ROC-plot pp.snp.homo ClippingRankSum

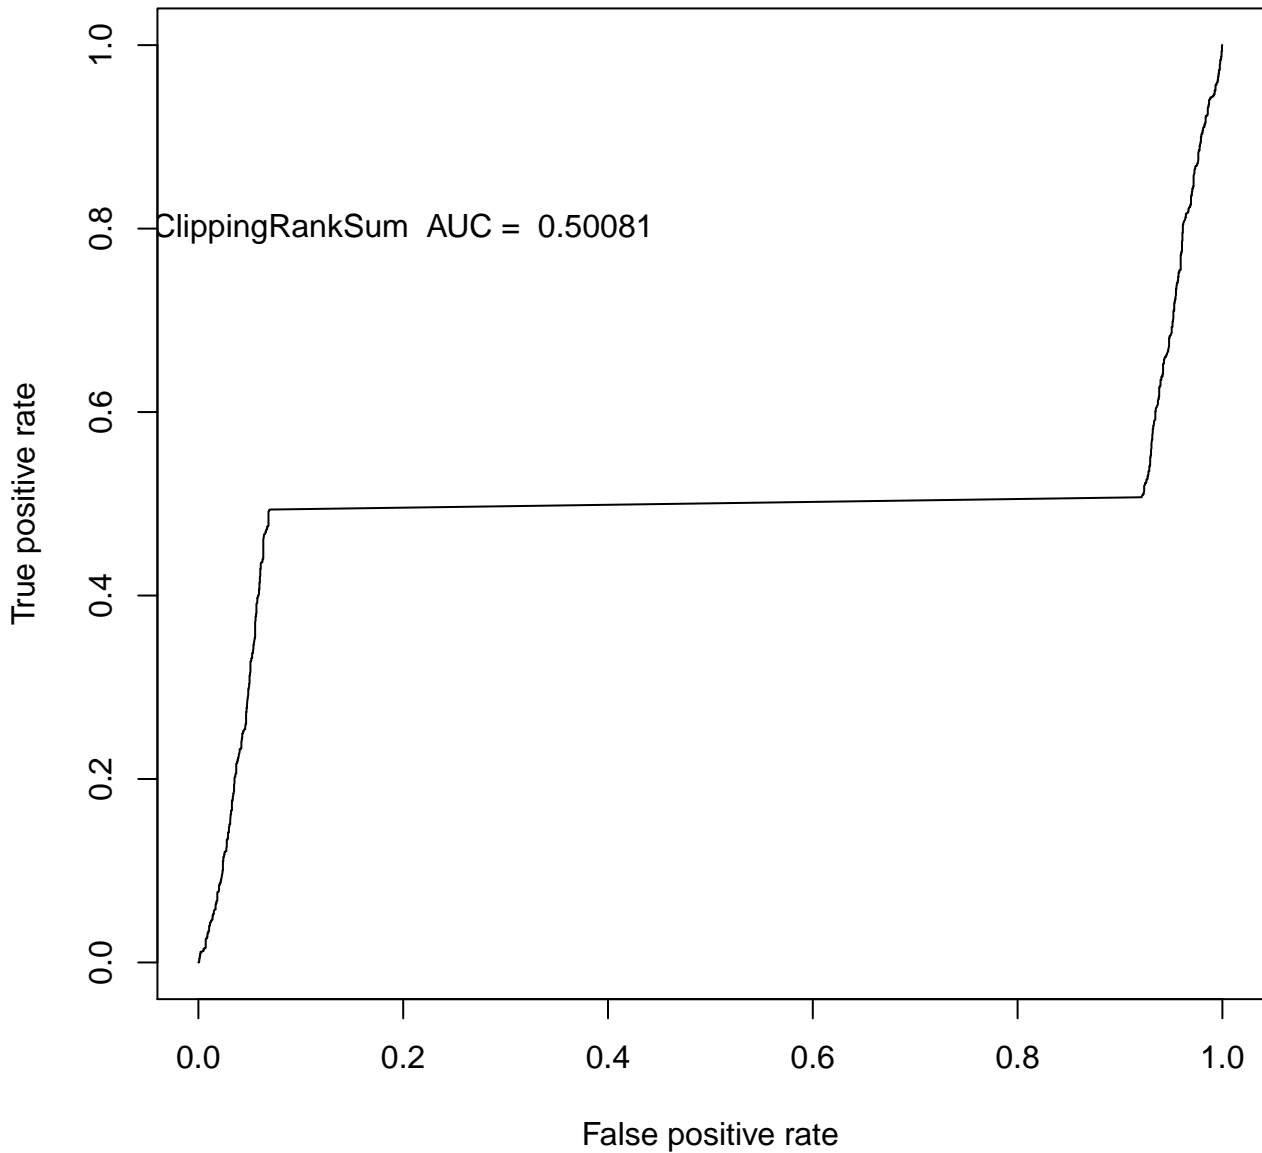



# ROC-plot pp.snp.homo DP

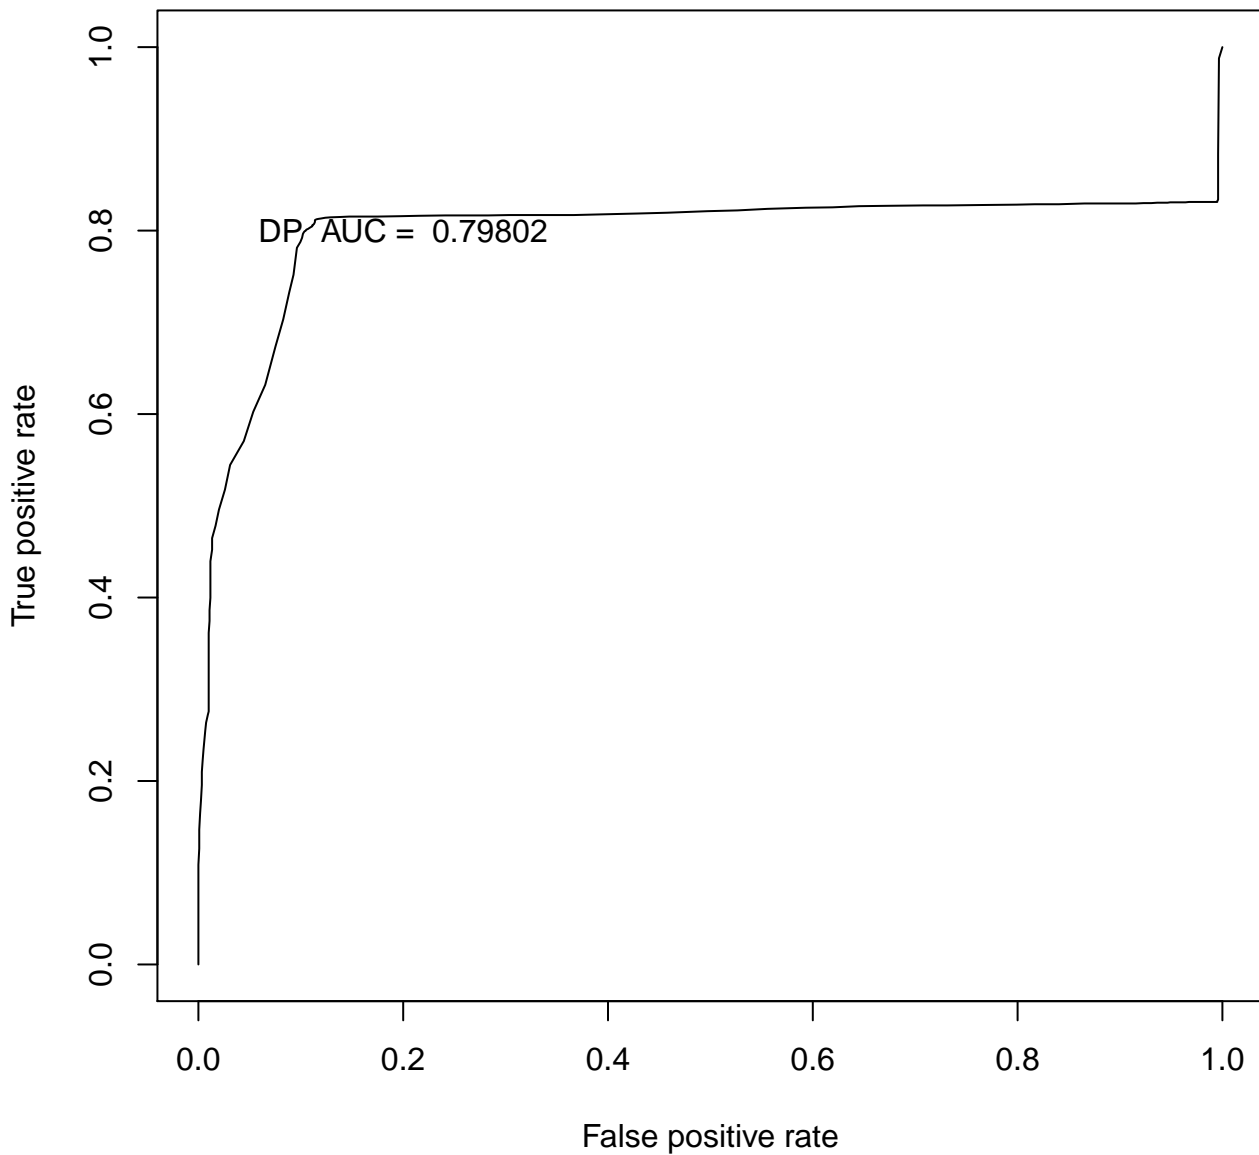

# ROC-plot pp.snp.homo MQ

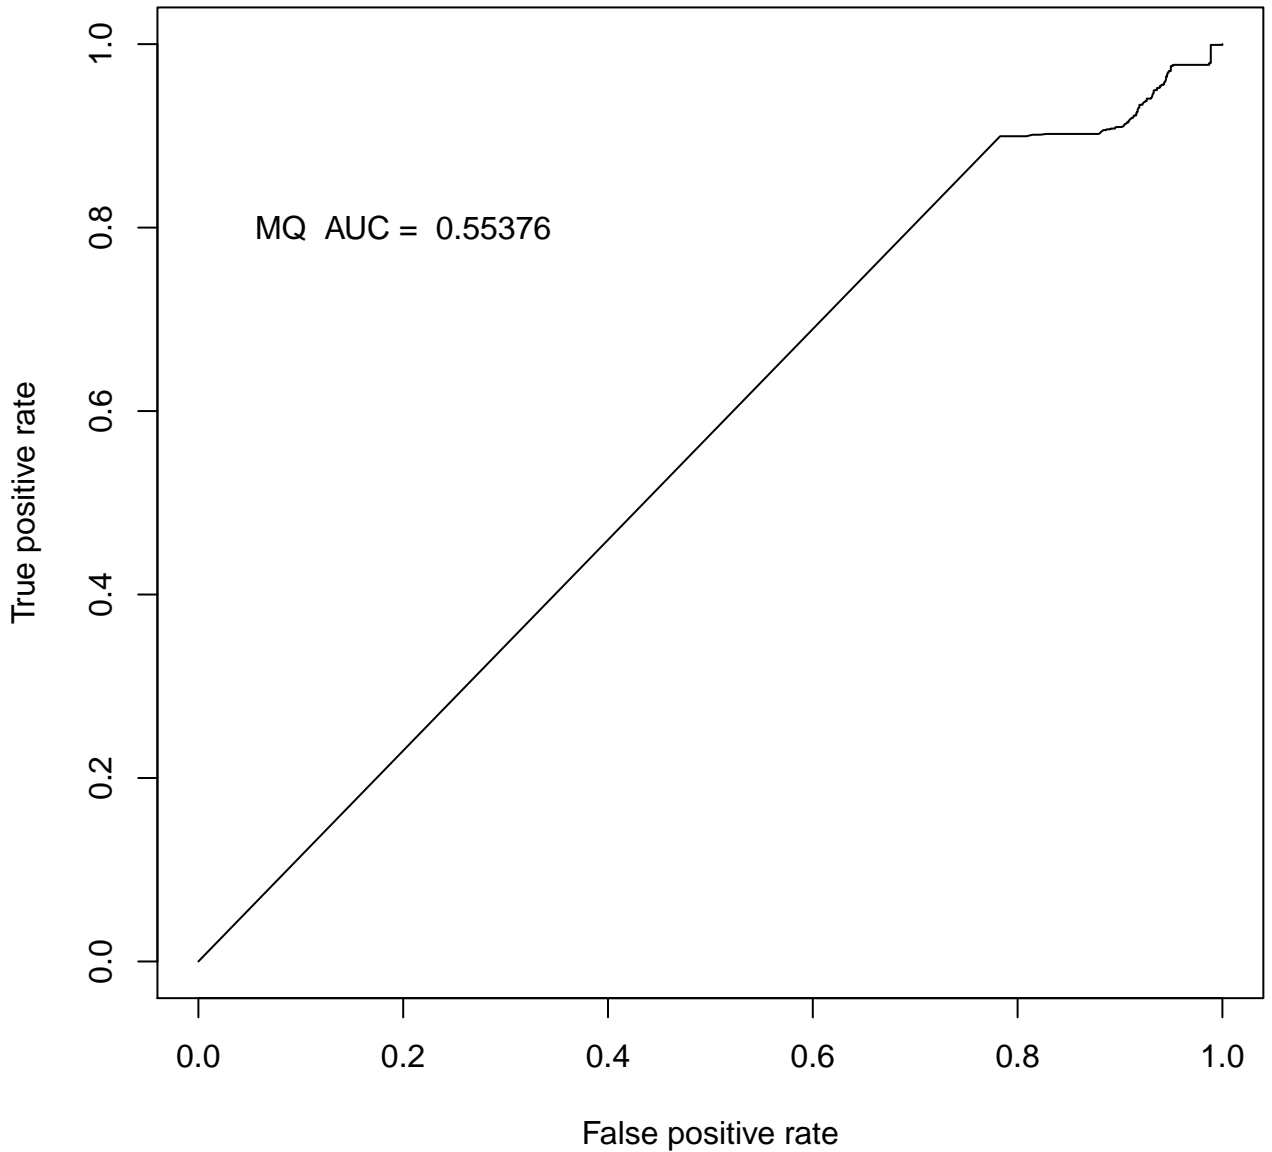

# ROC-plot pp.snp.homo MQRankSum

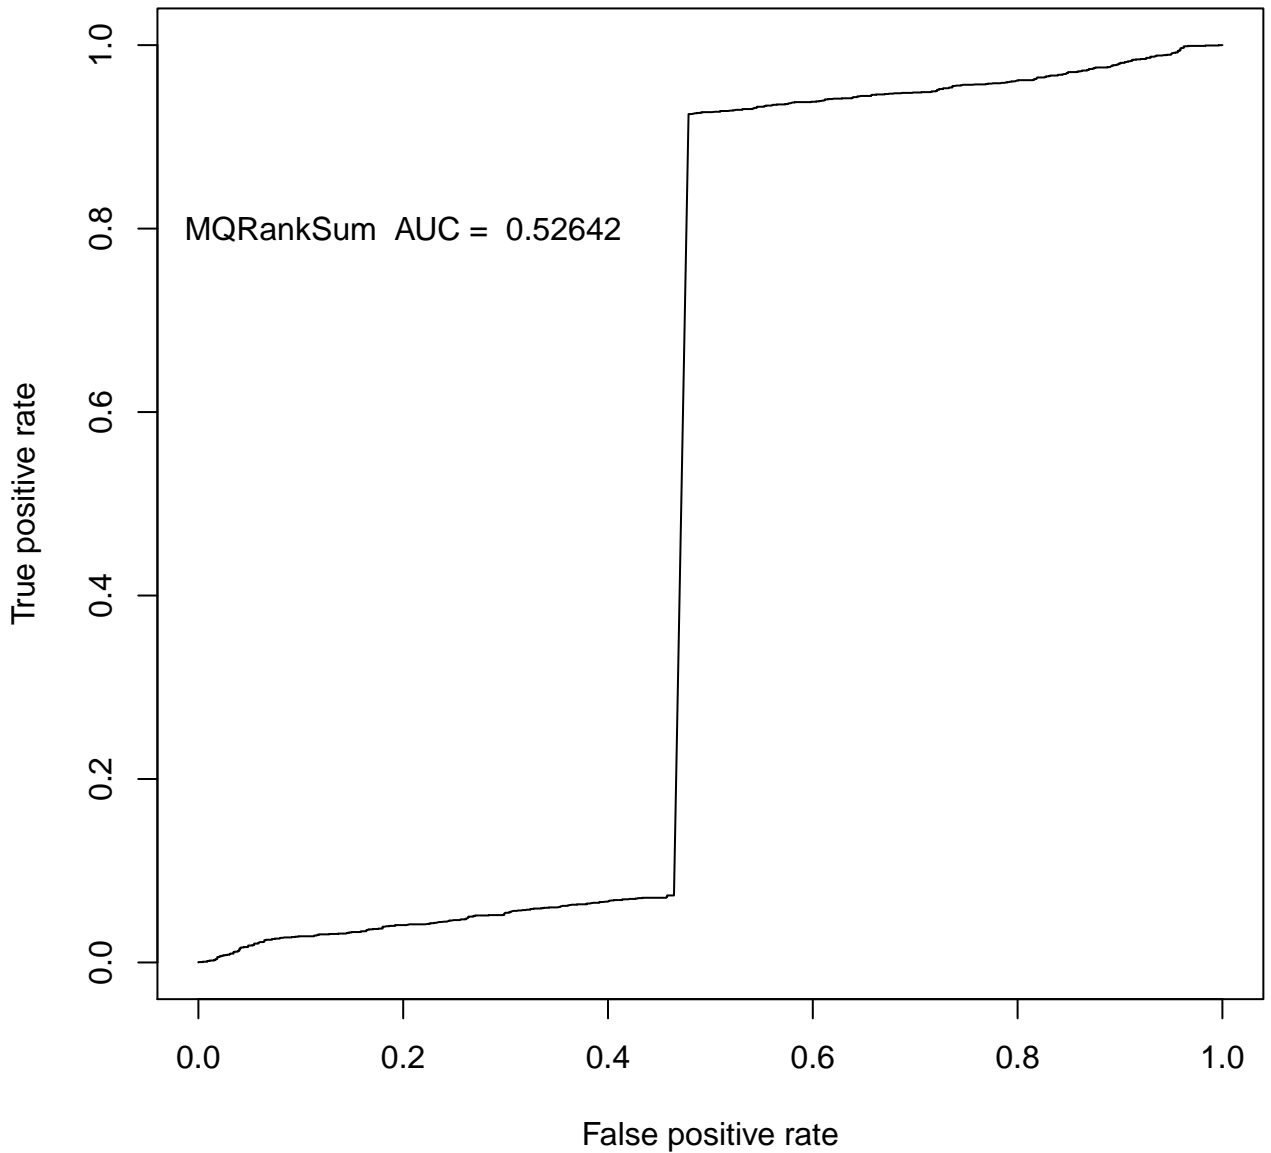

# ROC-plot pp.snp.homo ReadPosRankSum

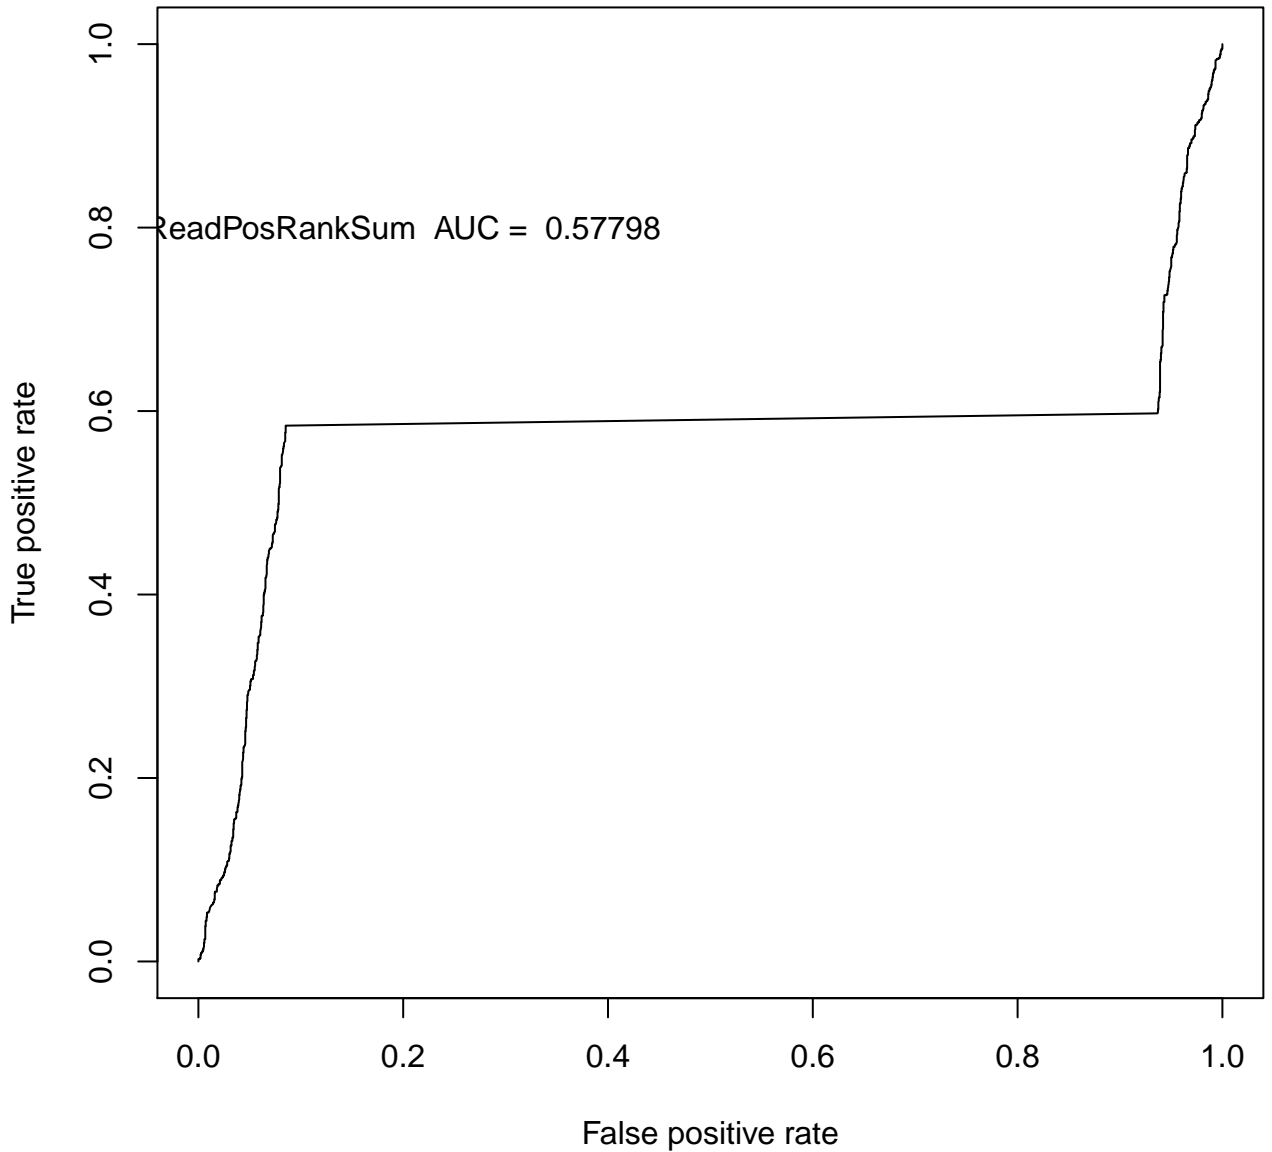

# ROC-plot pp.snp.homo GQ

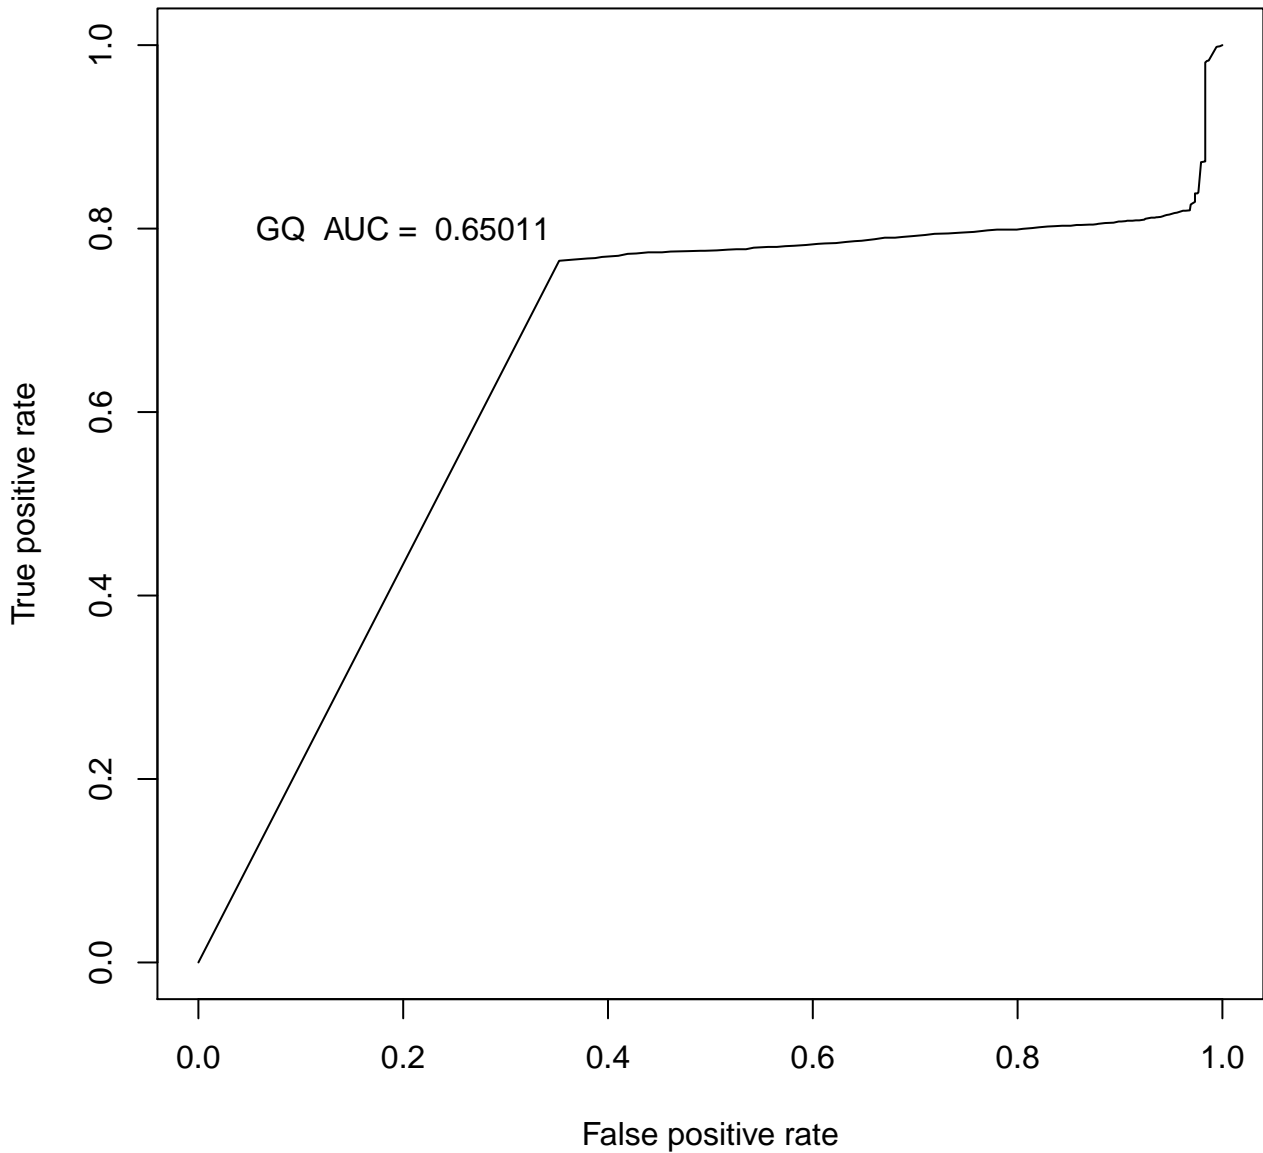

# ROC-plot pp.snp.homo ADT

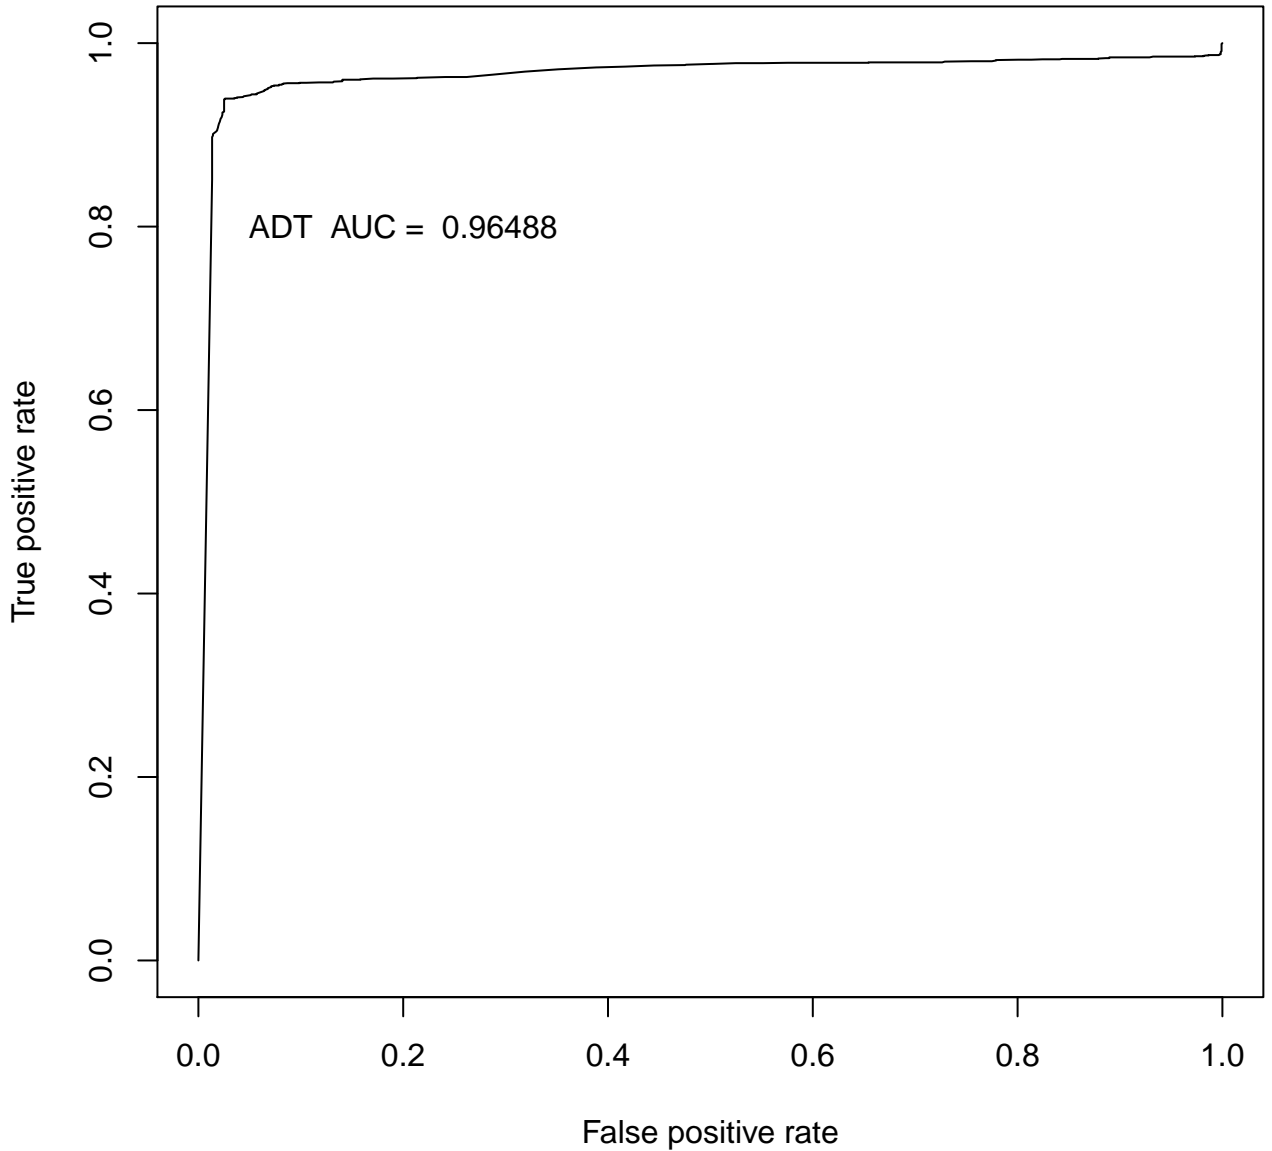

# ROC-plot pp.snp.homo ADTL

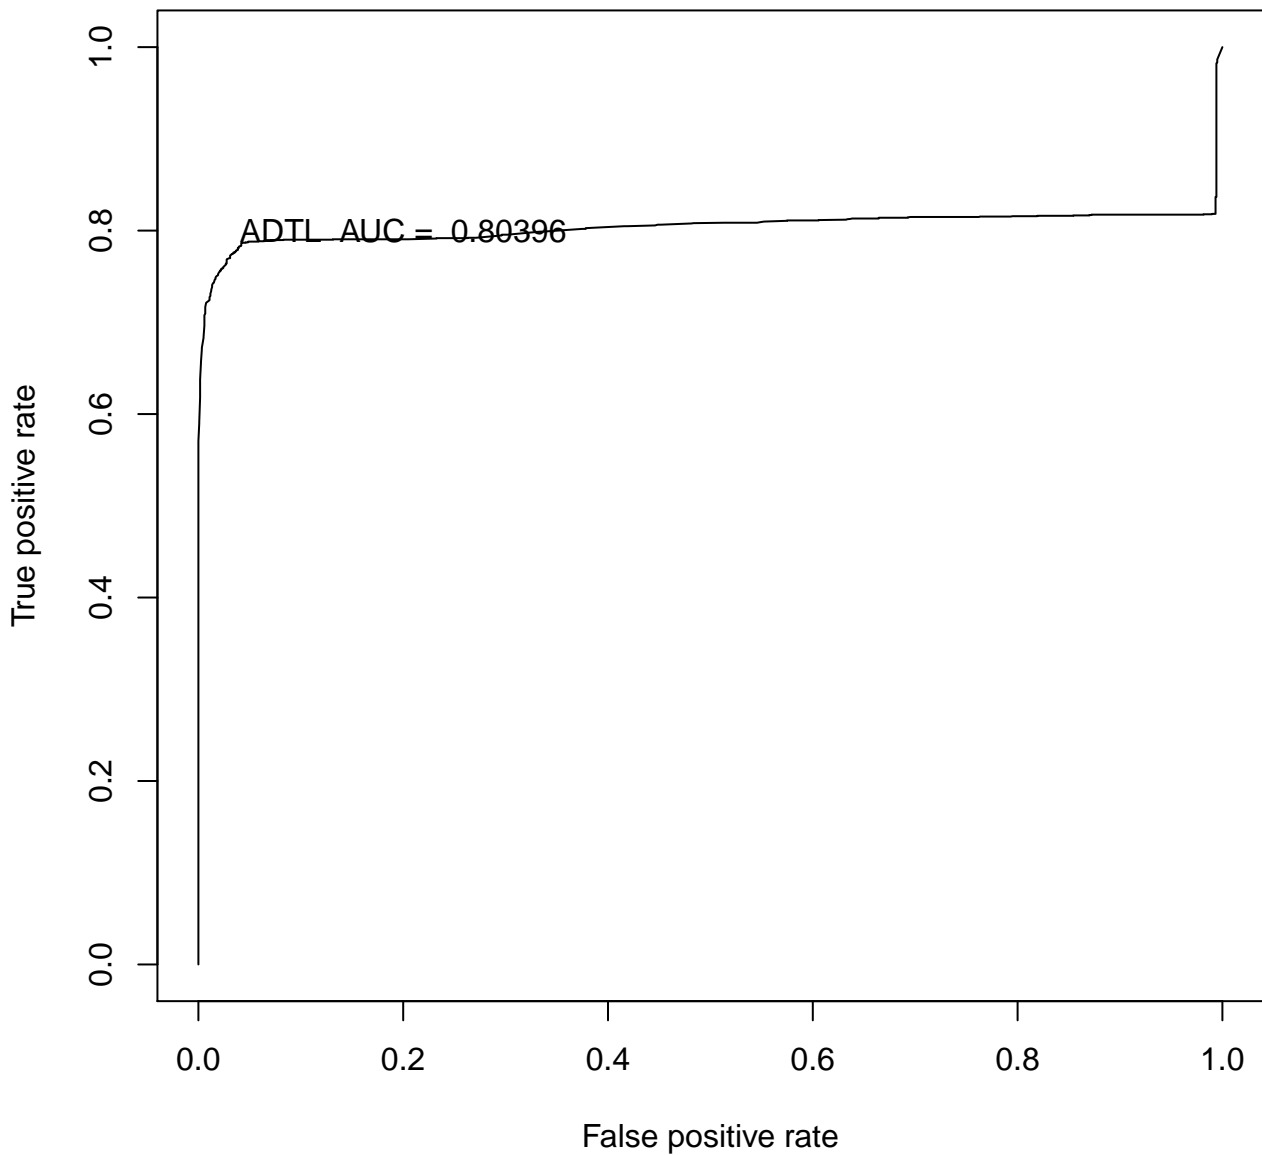

# ROC-plot pp.snp.homo FS

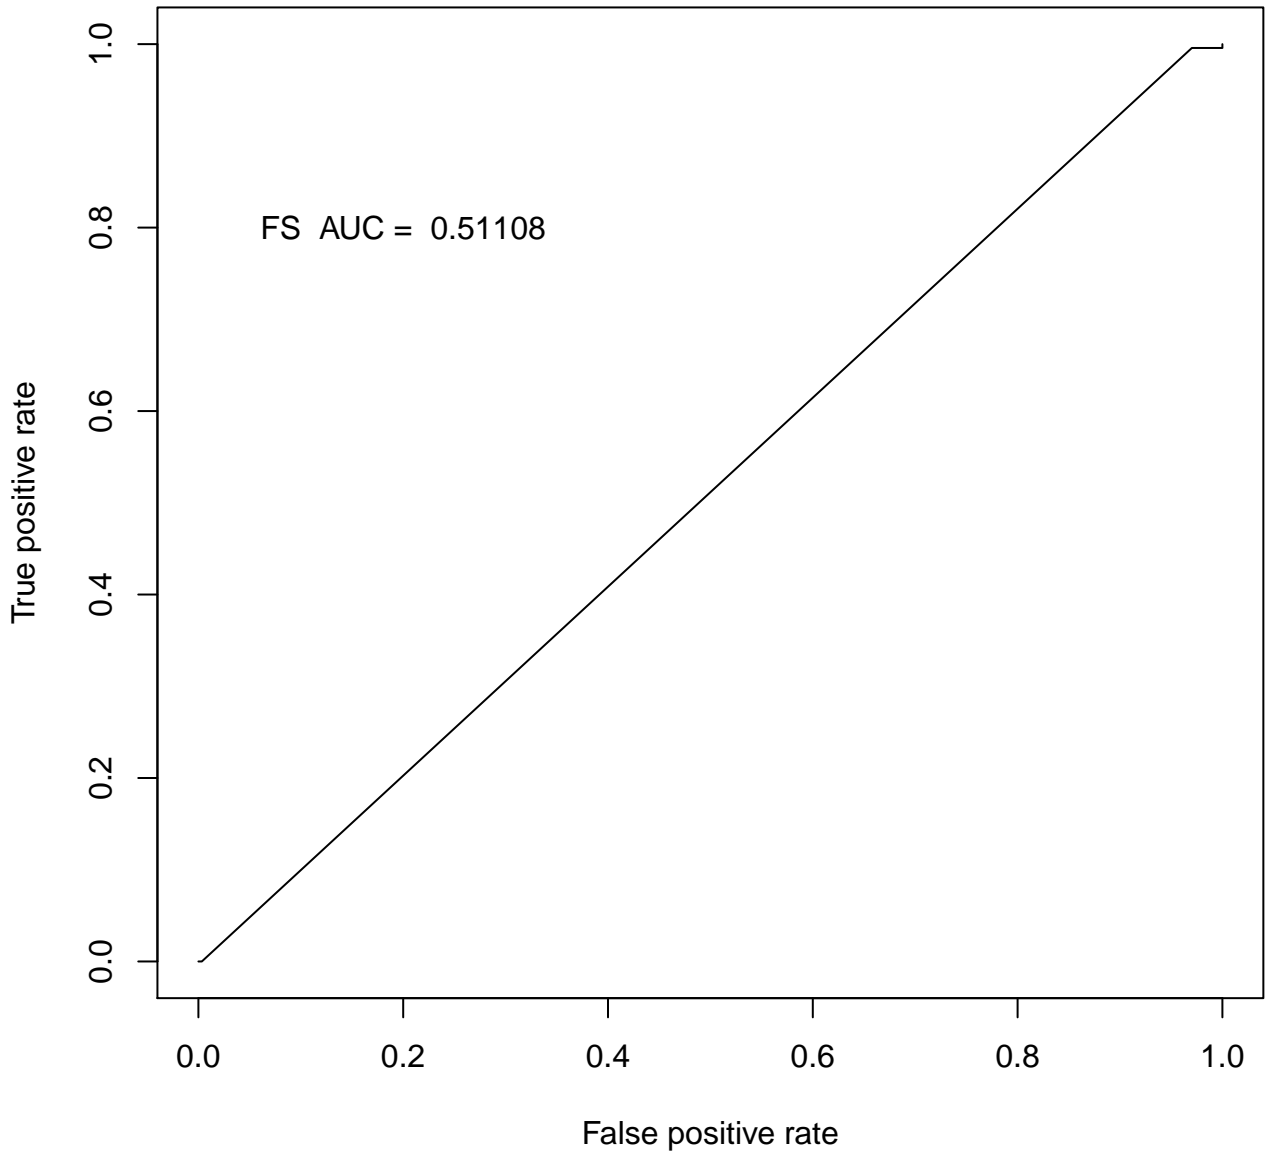

Supplement: 12859_2017_1537_MOESM2_ESM.pdf [file 12859_2017_1537_MOESM2_ESM.pdf]
