# Supplementary material for: GATK hard filtering: tunable parameters to improve variant calling for next generation sequencing targeted gene panel data
Source: PubMed Central journal article supplement (PMC5374681; doi:10.1186/s12859-017-1537-8), 2017-03-23

# HC SNV Heterozygous

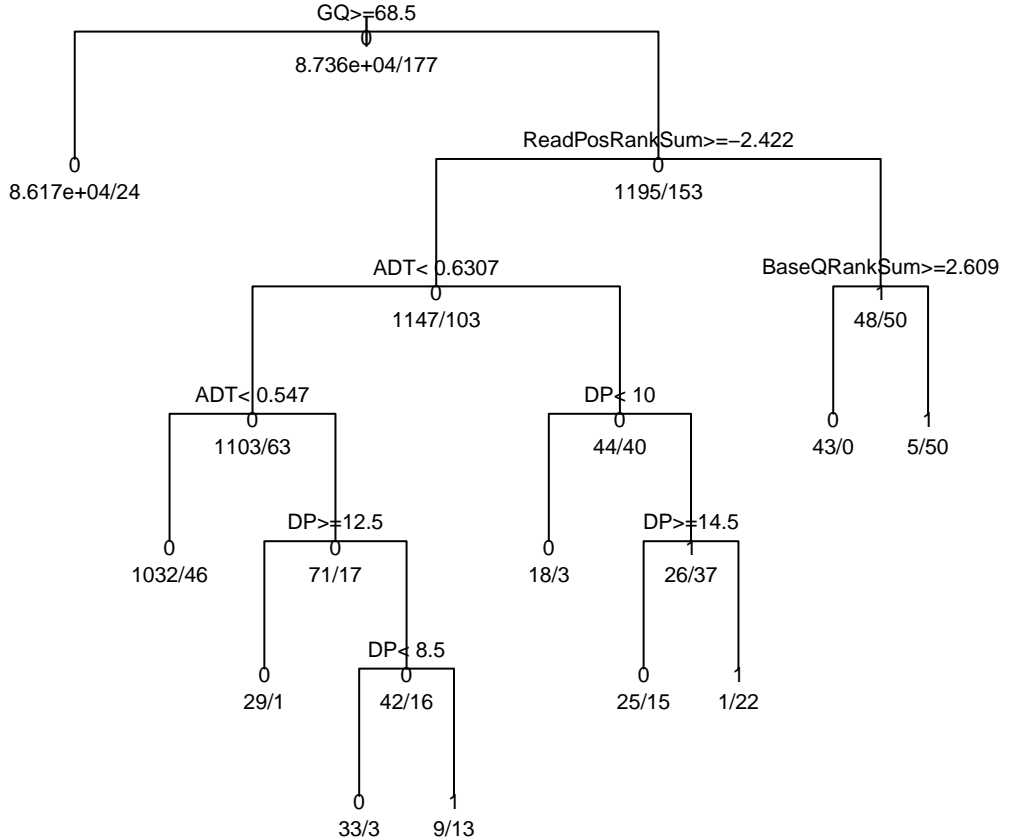

# HC SNV Homozygous

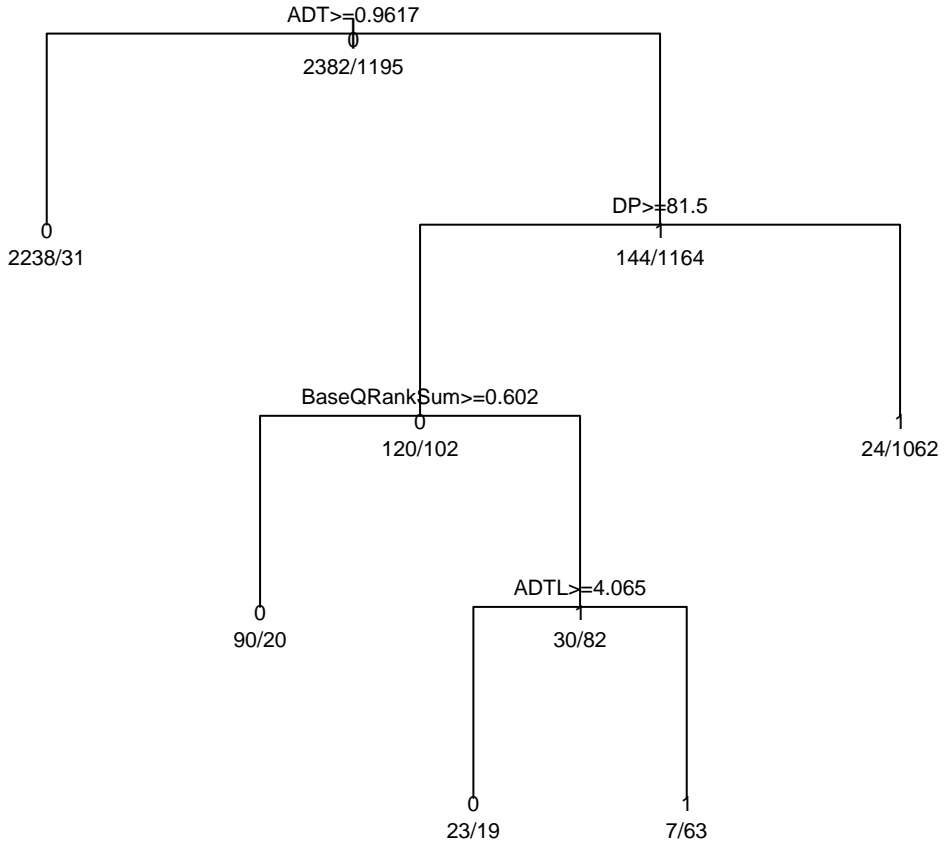

# HC Indel Heterozygous

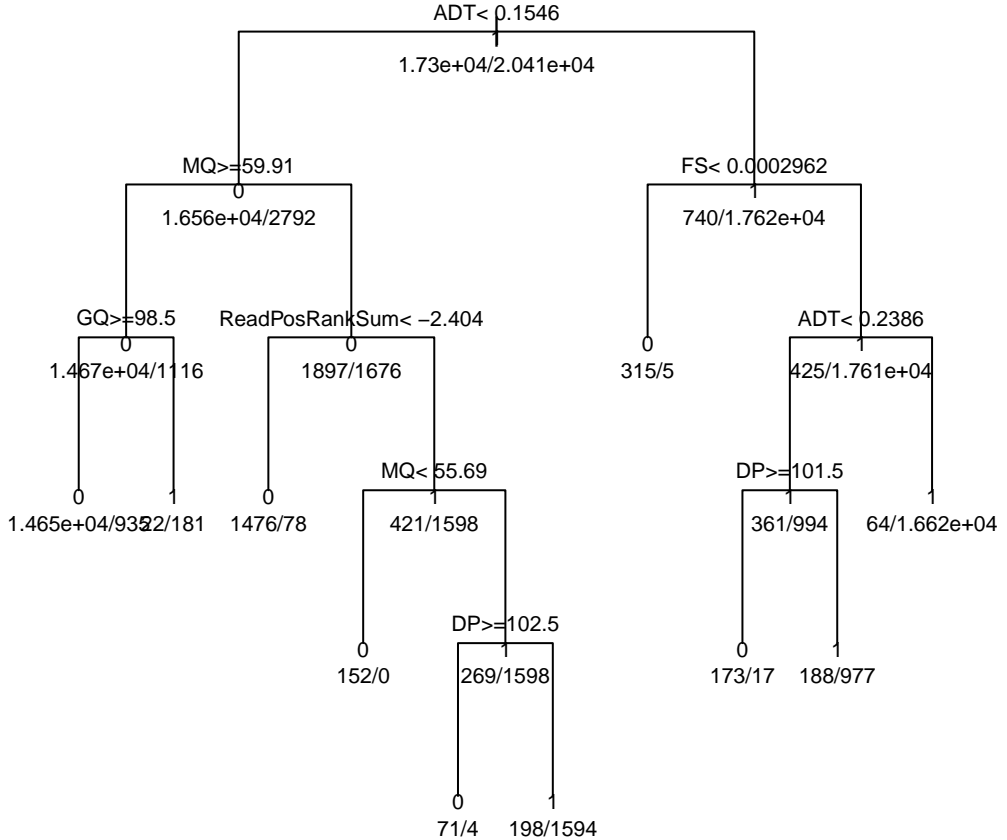

# HC Indel Homozygous

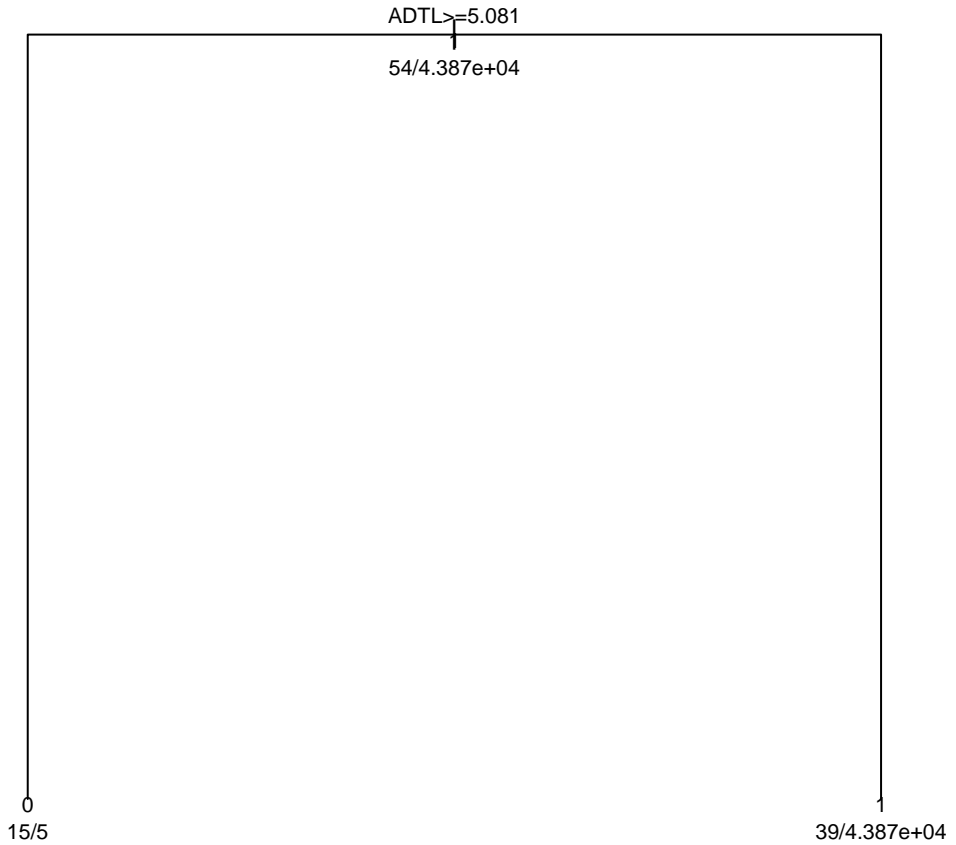

# LC SNV Heterozygous

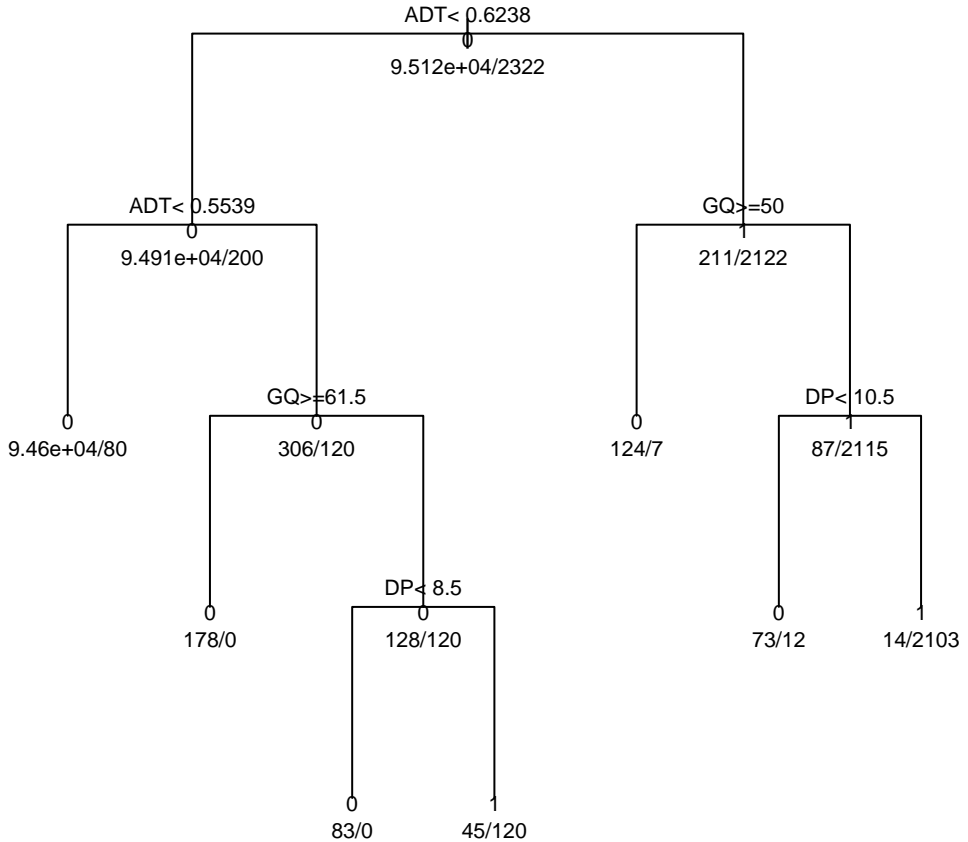

# LC SNV Homozygous

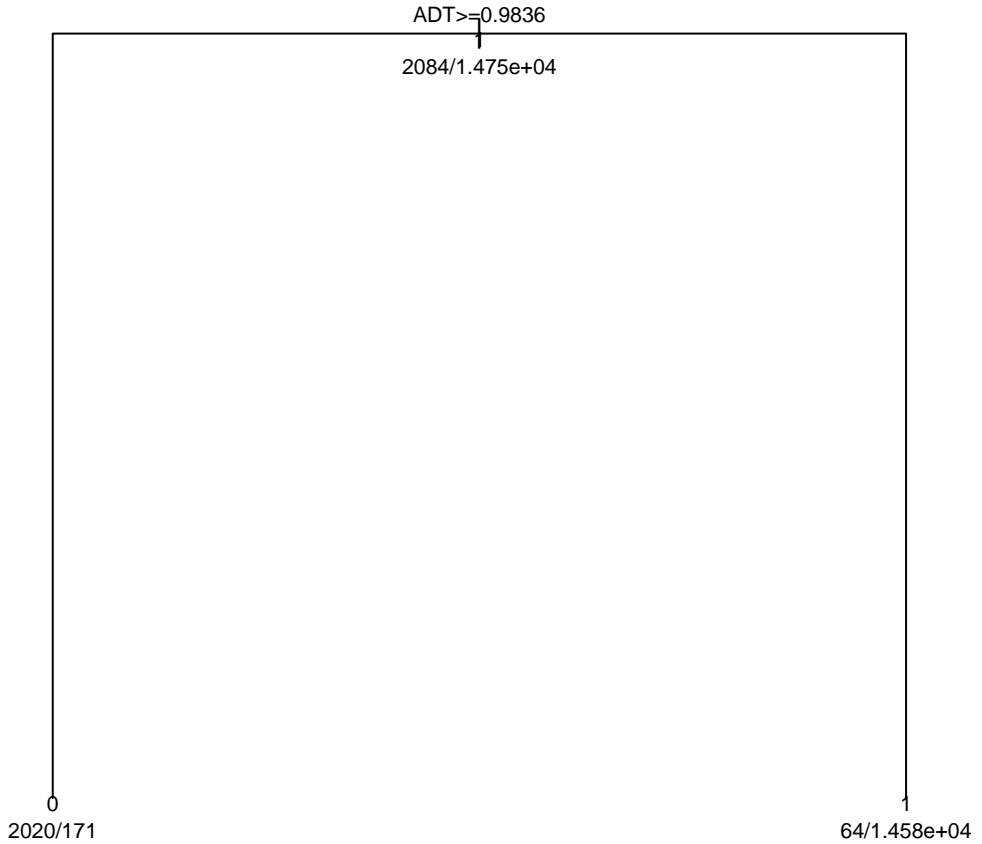

# LC Indel Heterozygous

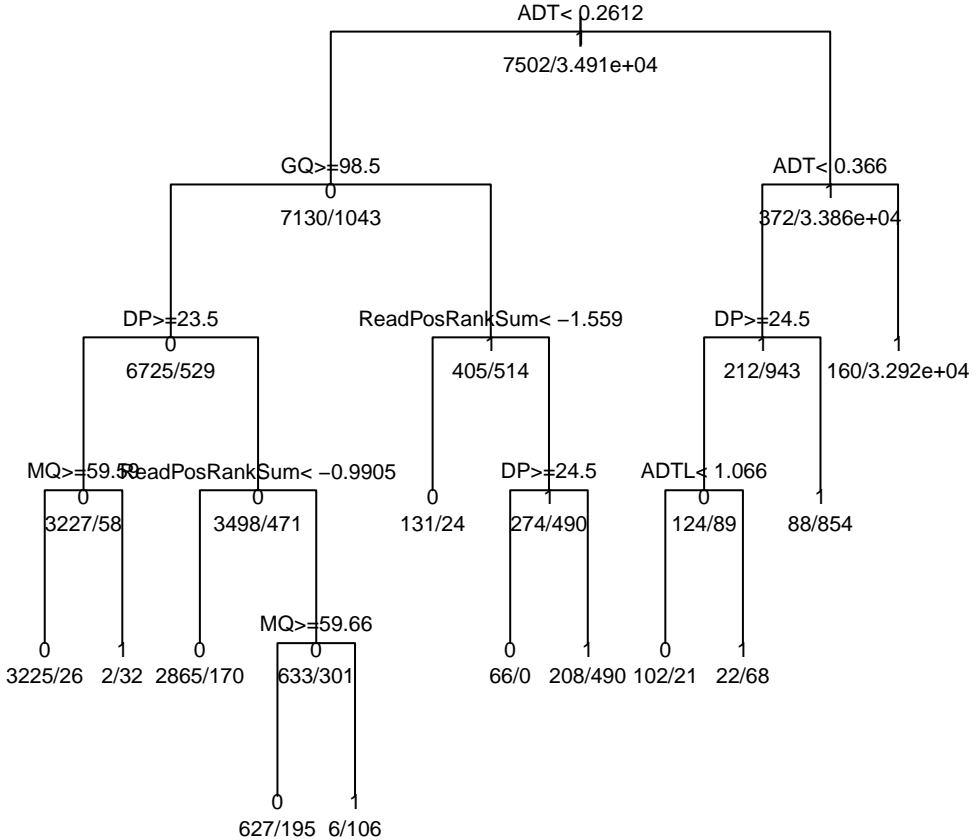

Supplement: 12859_2017_1537_MOESM3_ESM.pdf [file 12859_2017_1537_MOESM3_ESM.pdf]
